# Supplementary material for: Revealing misassembled segments in the bovine reference genome by high resolution linkage disequilibrium scan
Source: PubMed Central journal article supplement (PMC5011828; doi:10.1186/s12864-016-3049-8), 2016-09-05

**Figure S5 Misassembled Segment (MisSeg).** Left and right columns represent misplacements (red dots) found in Holstein and Nellore, respectively.

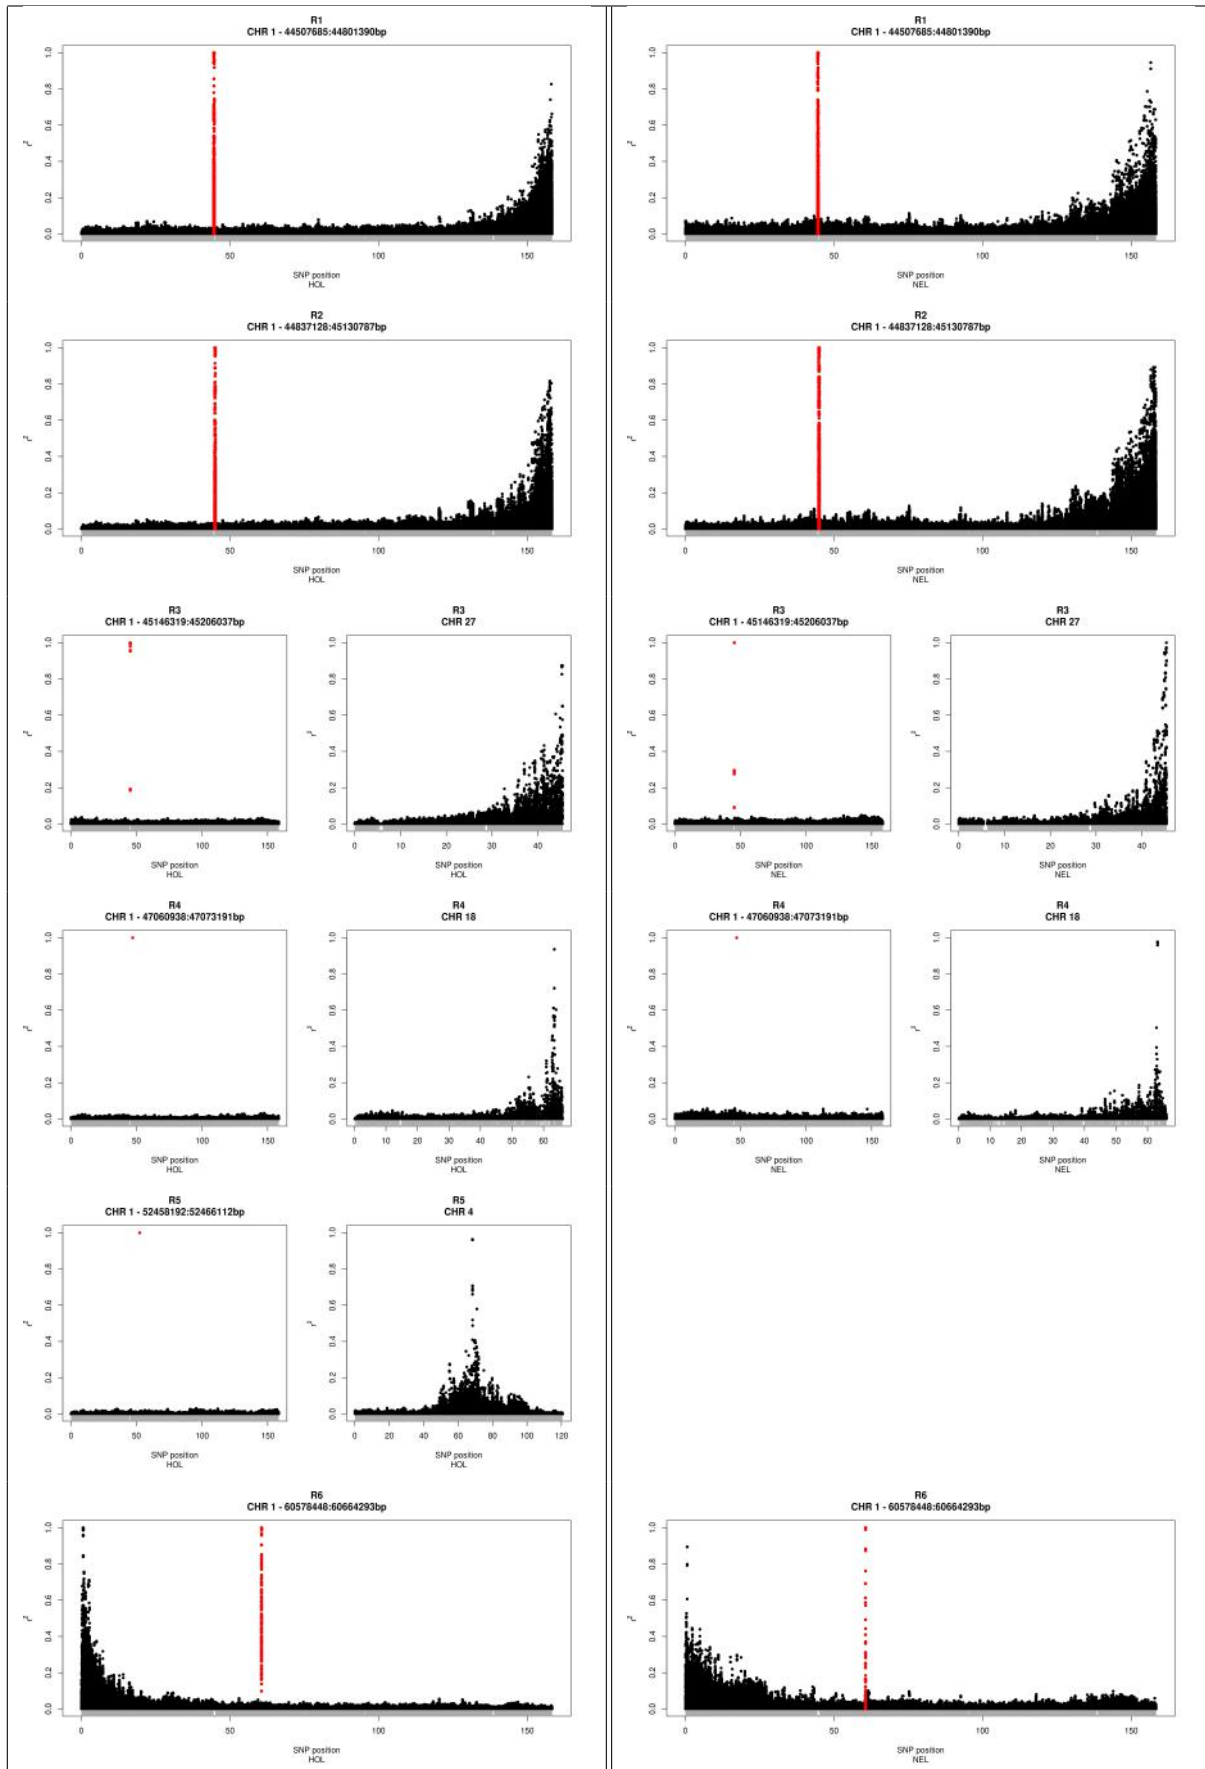

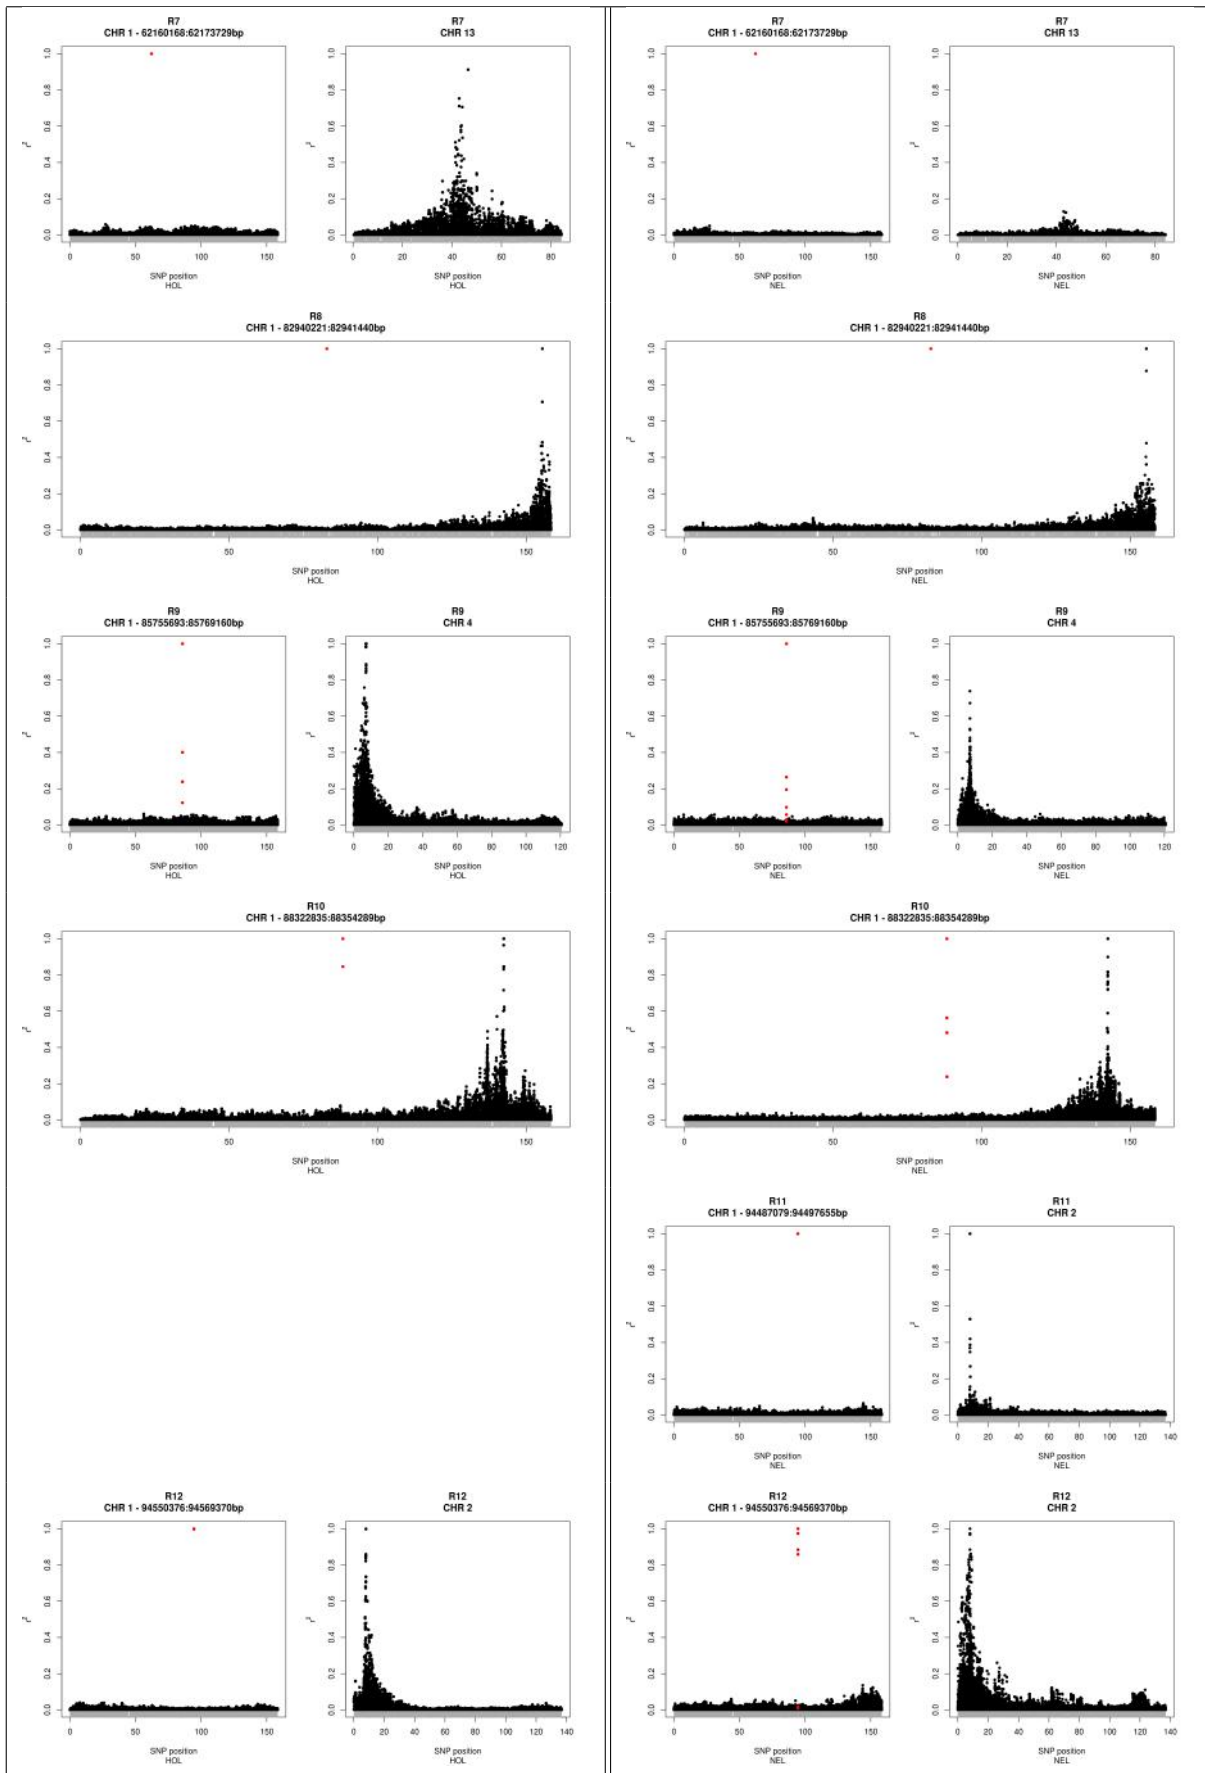

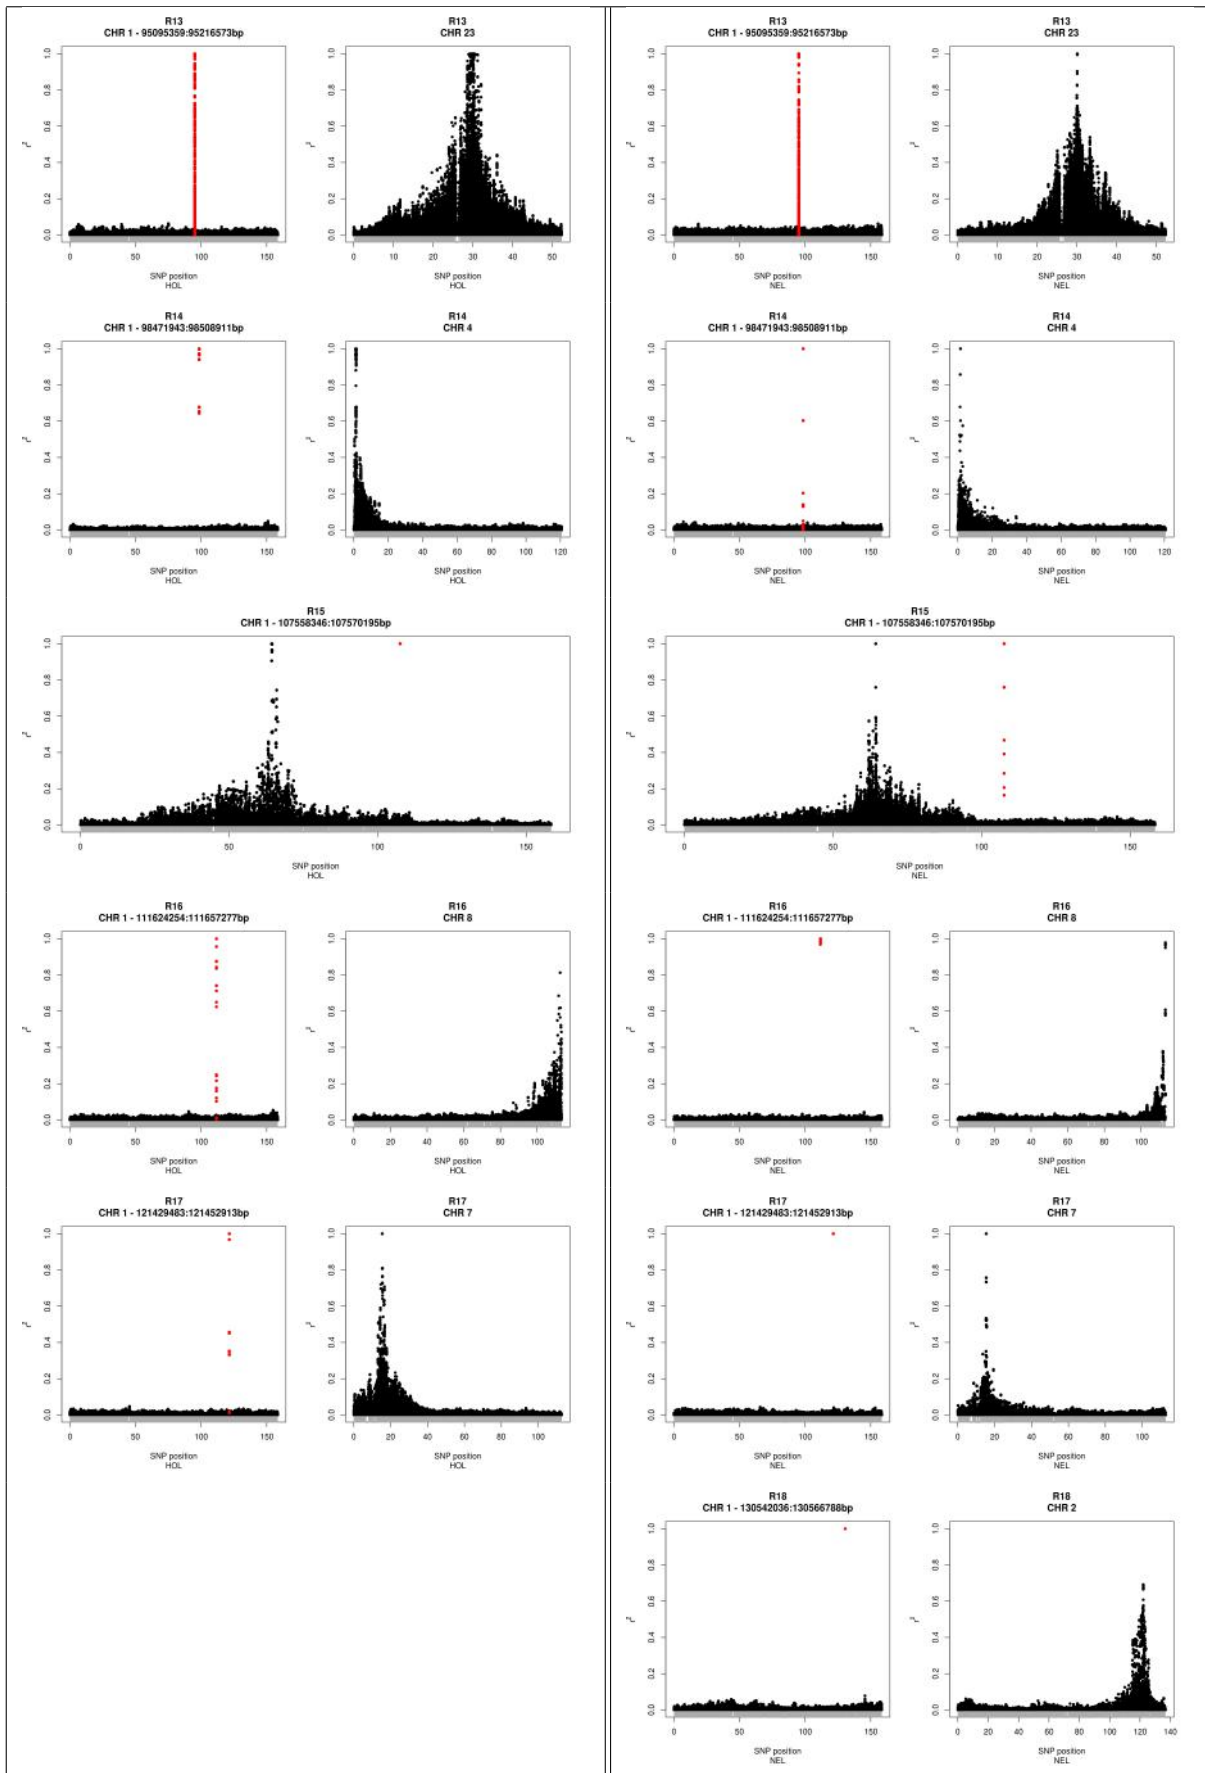

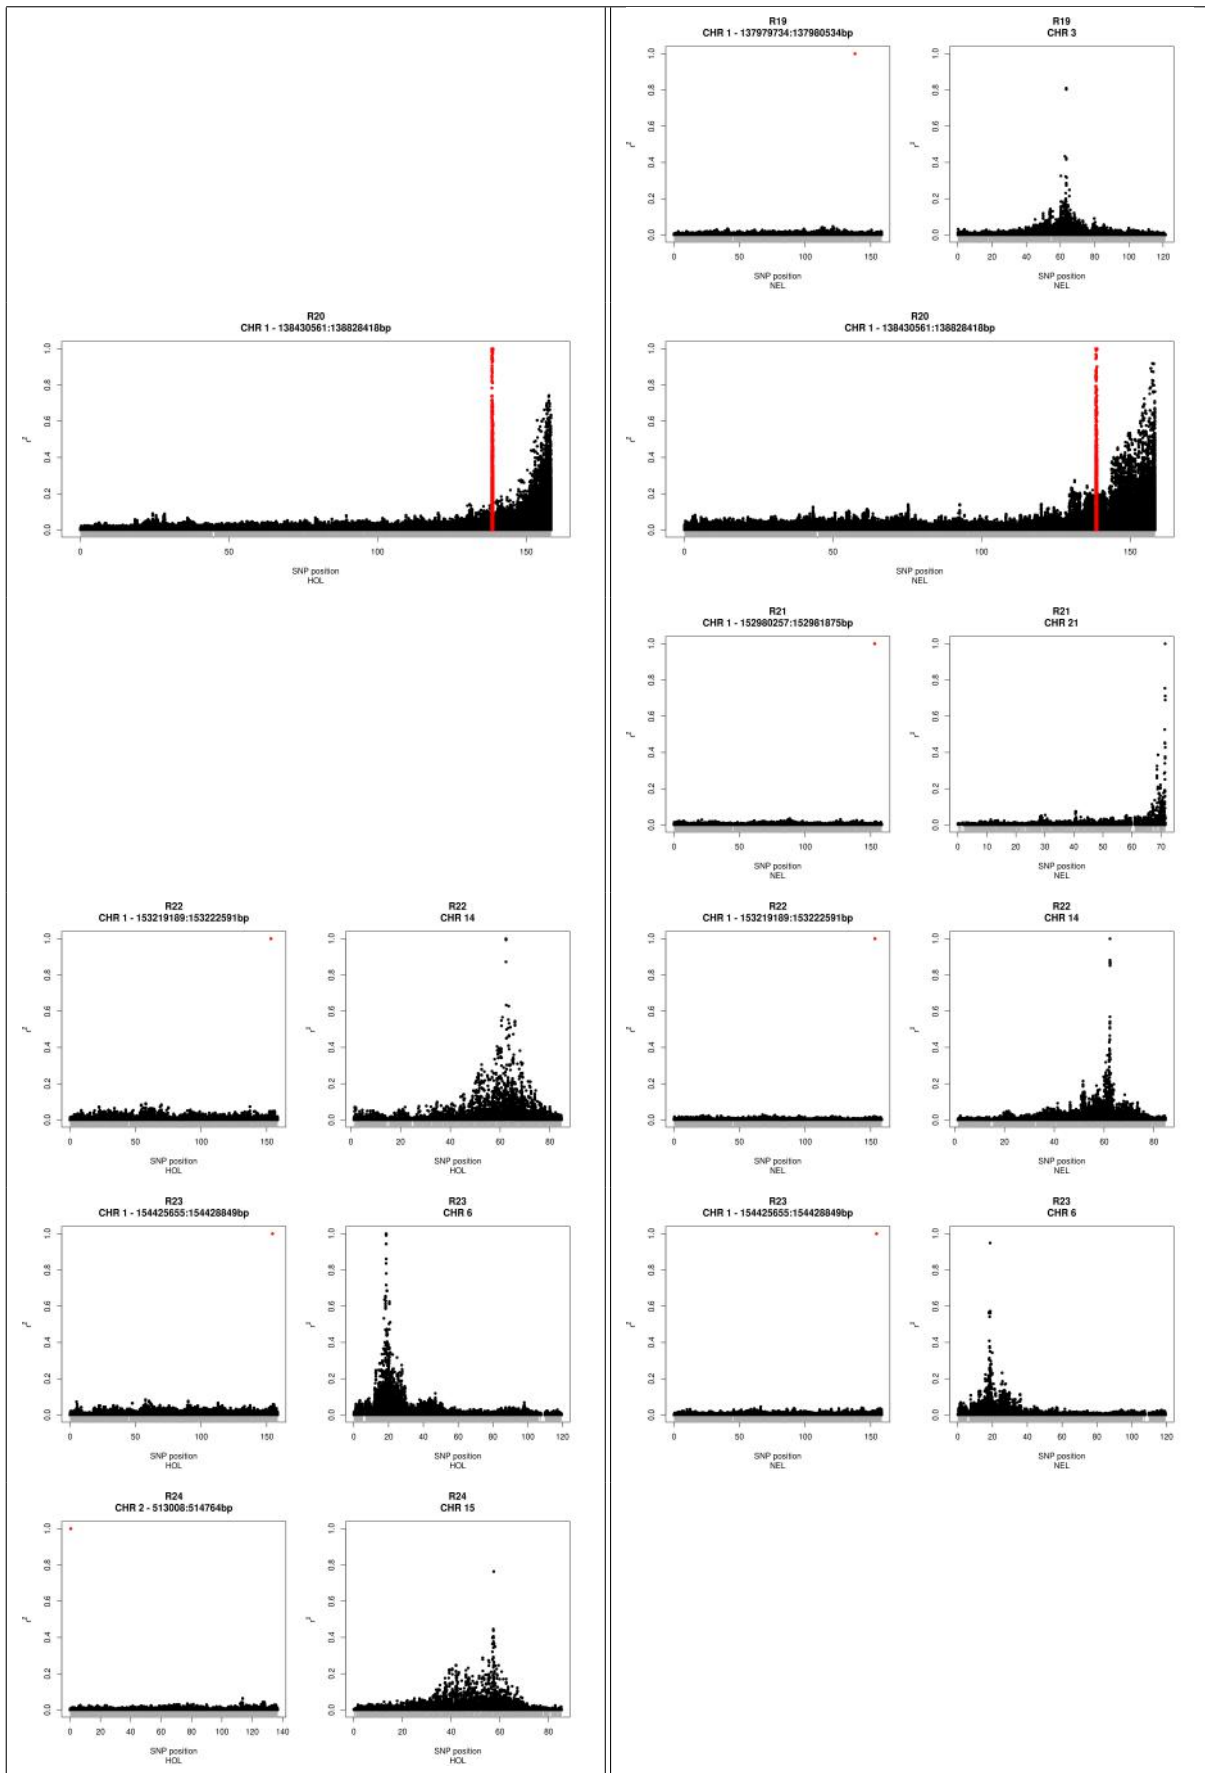

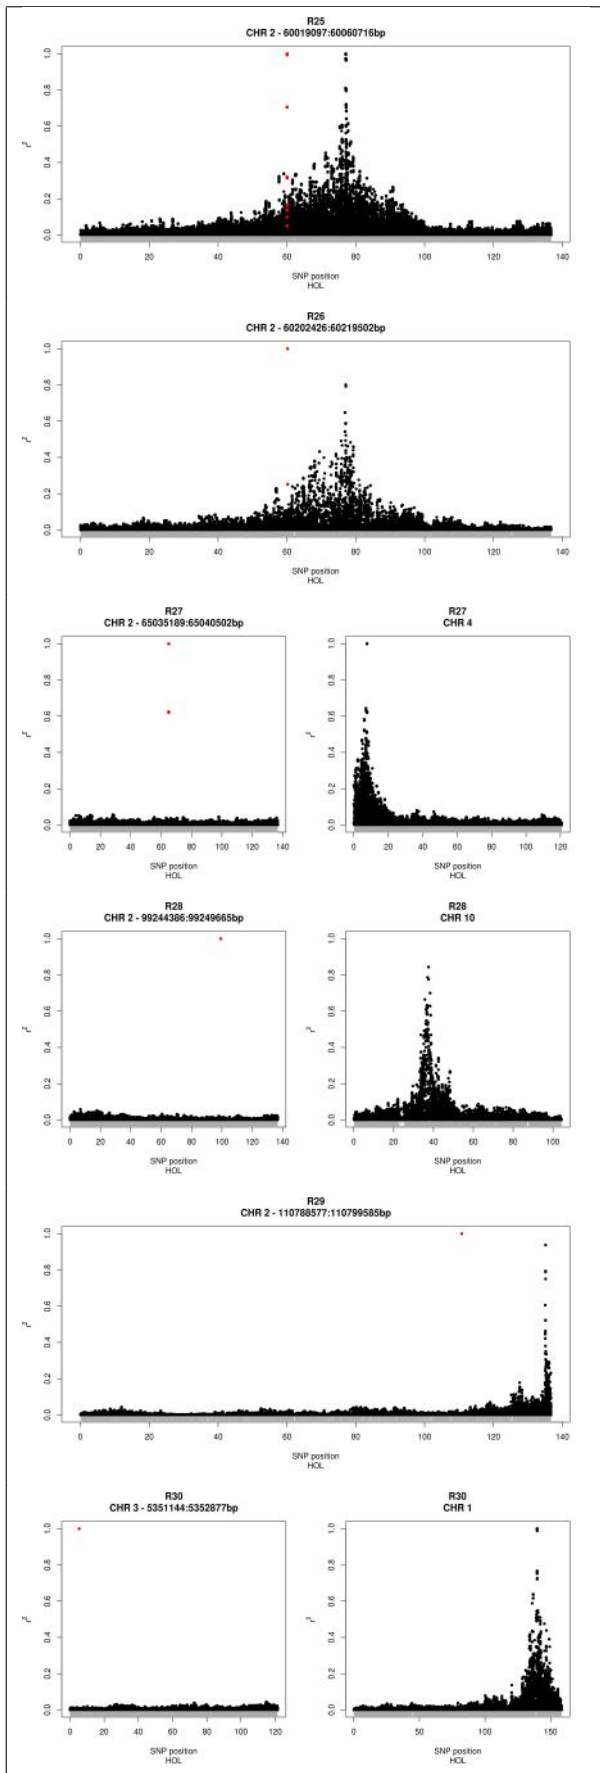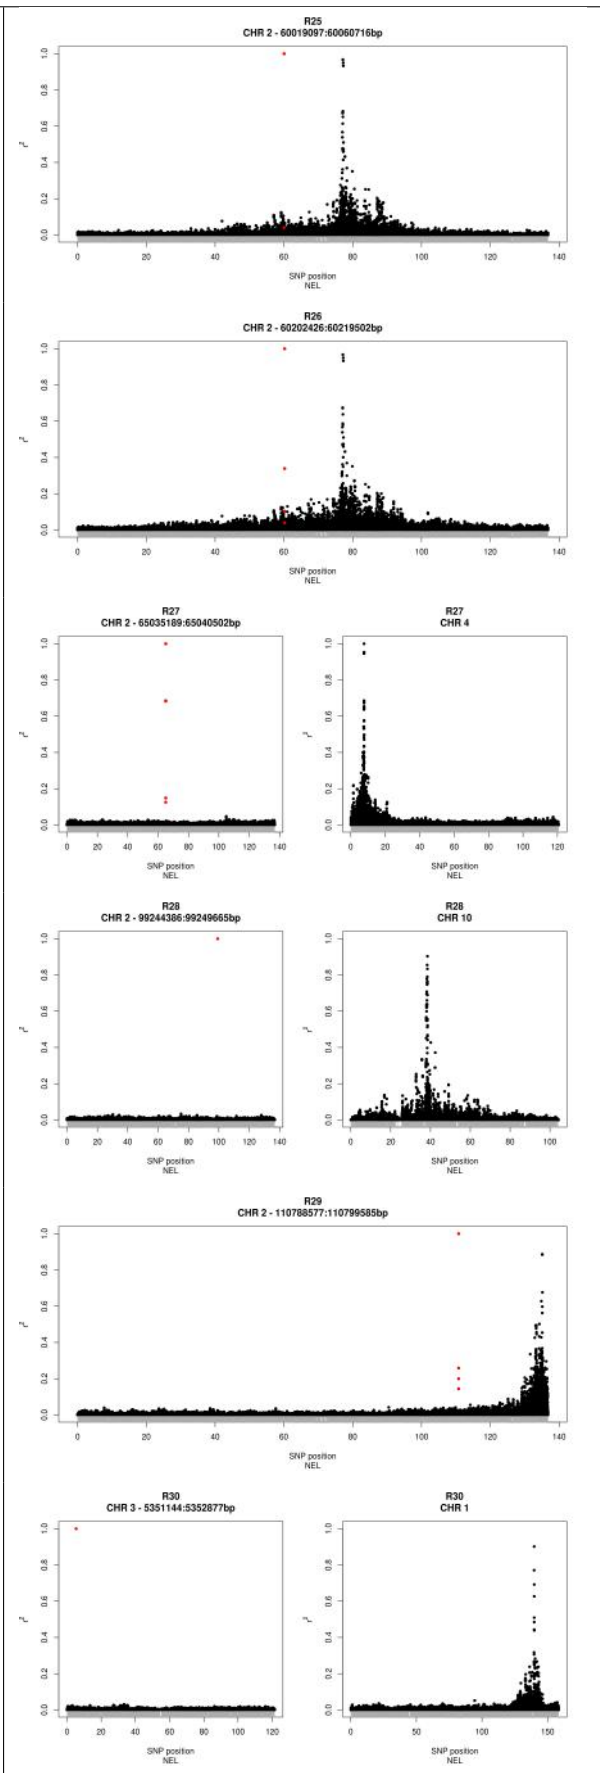

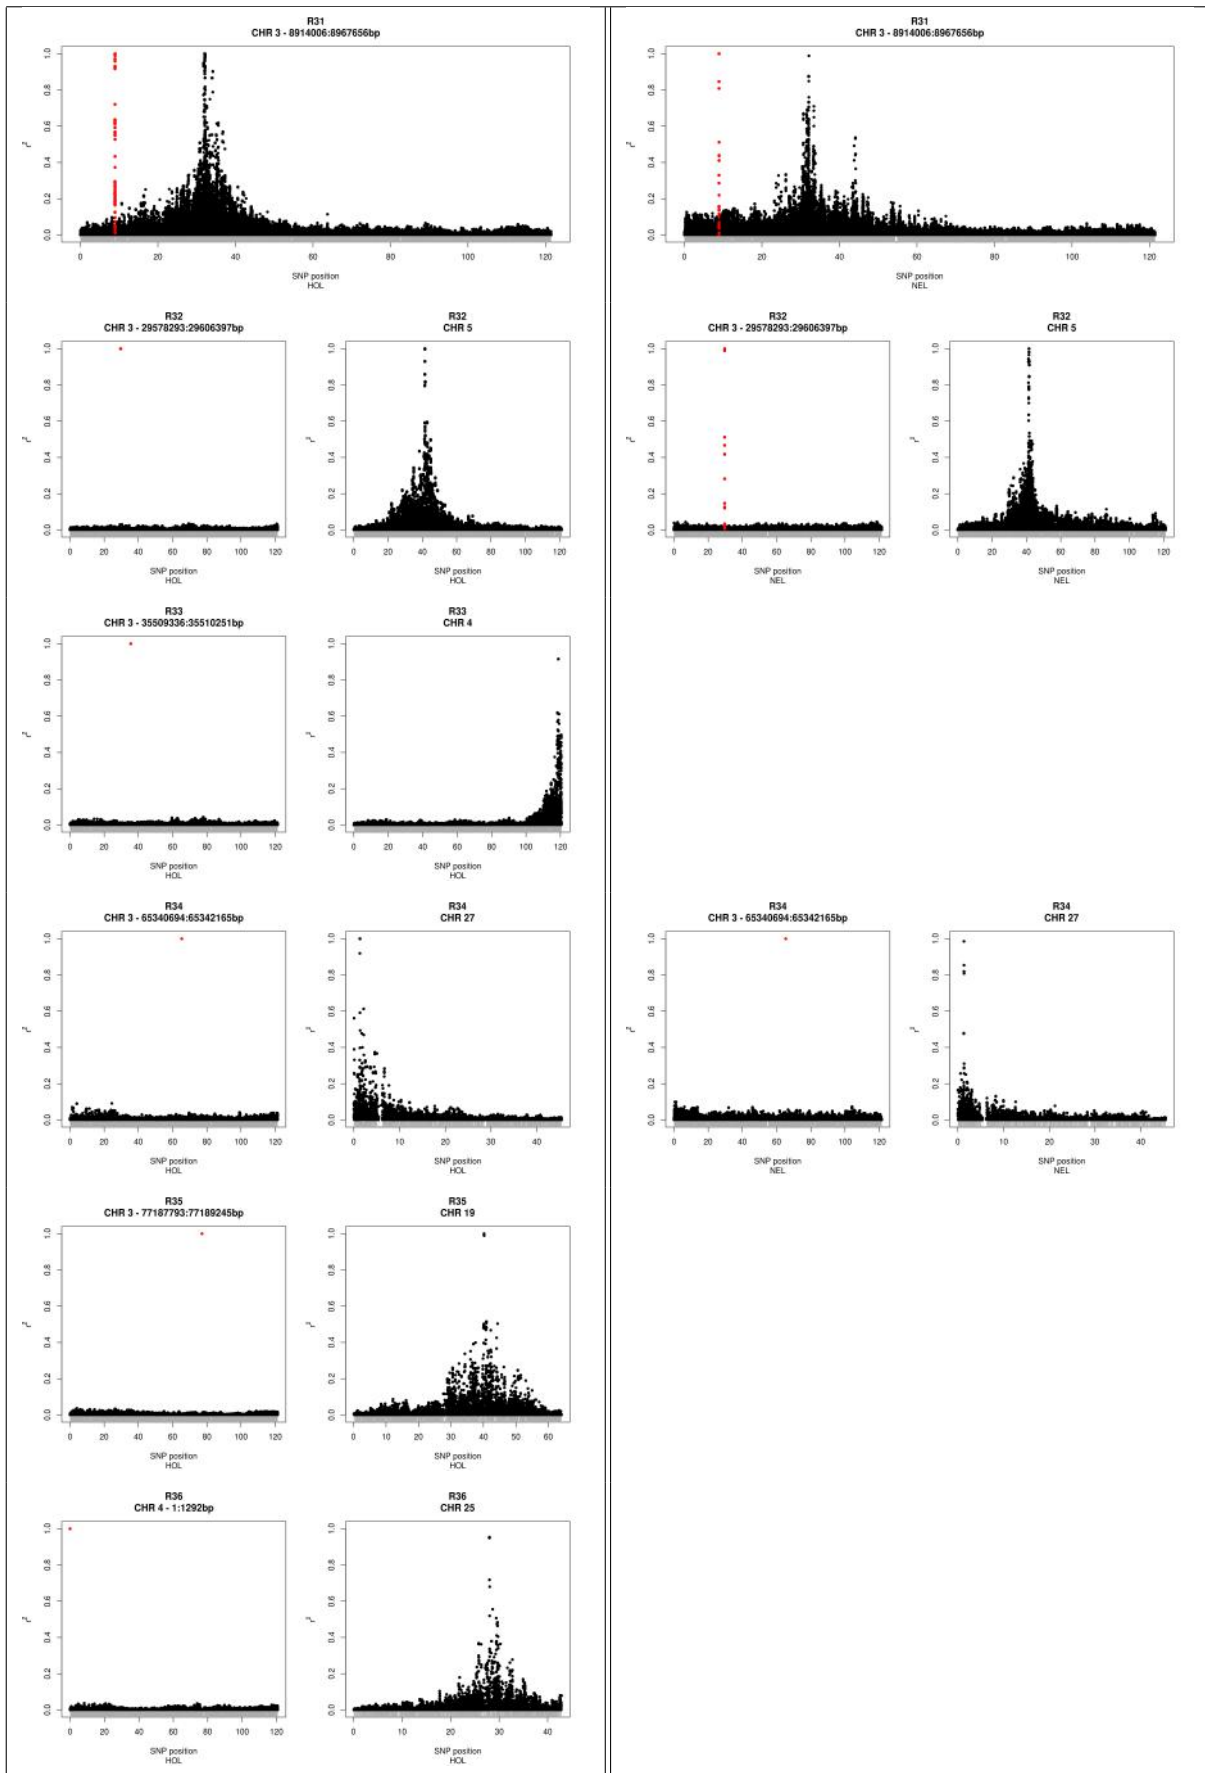

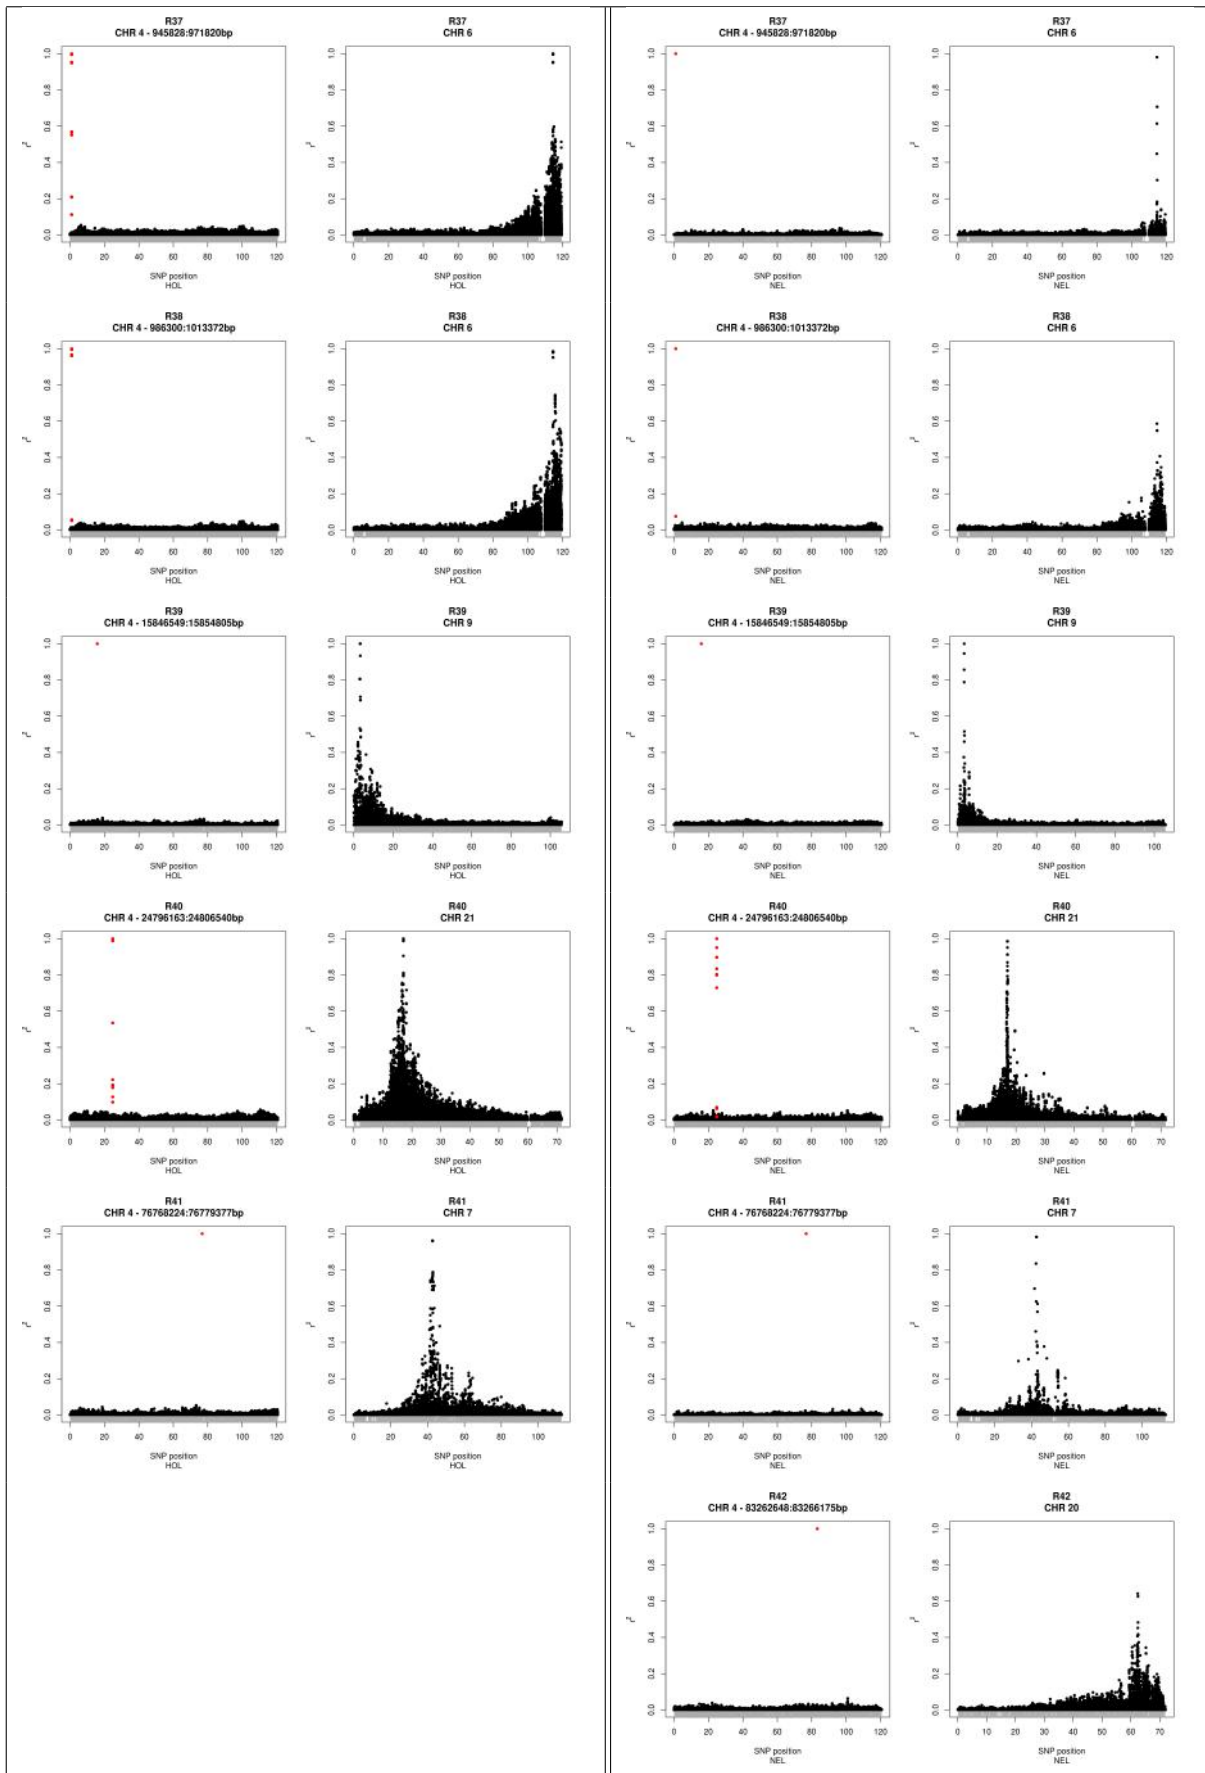

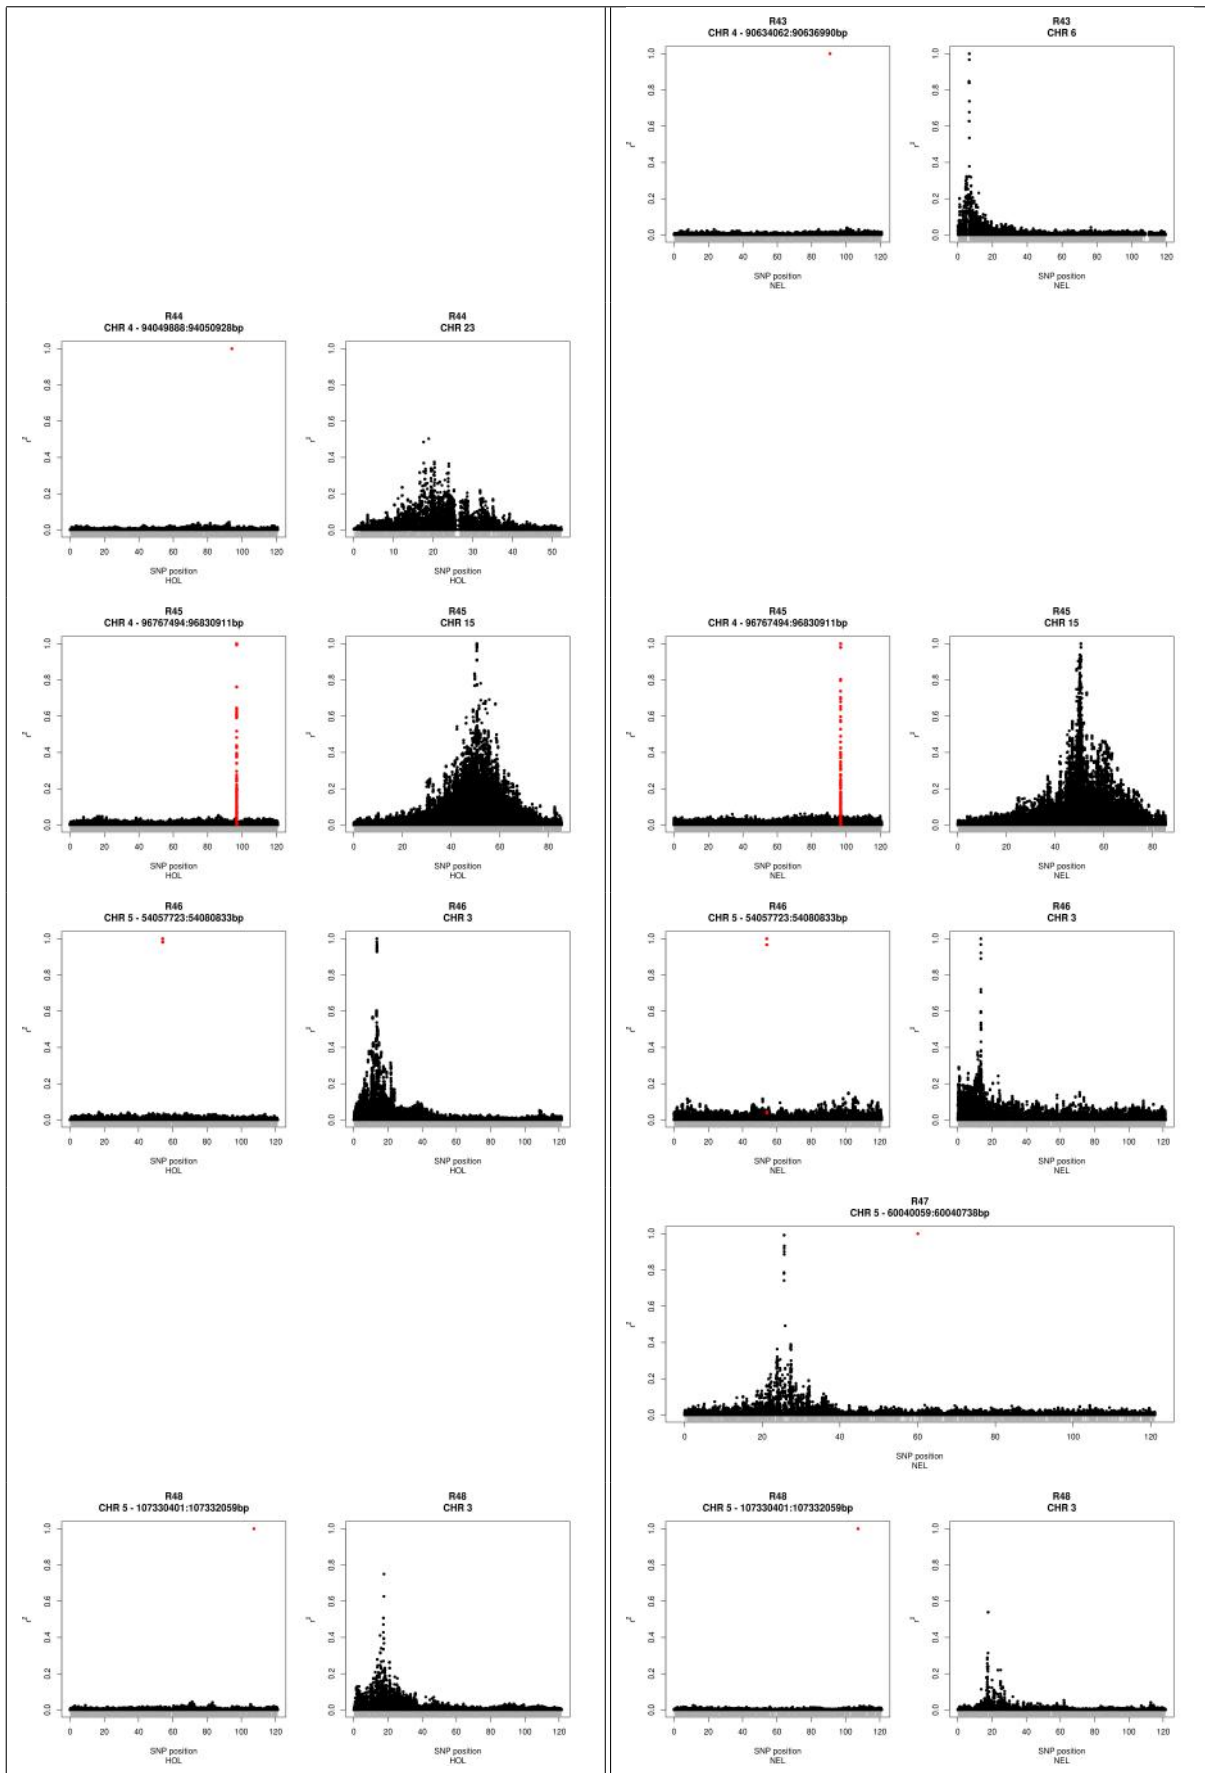



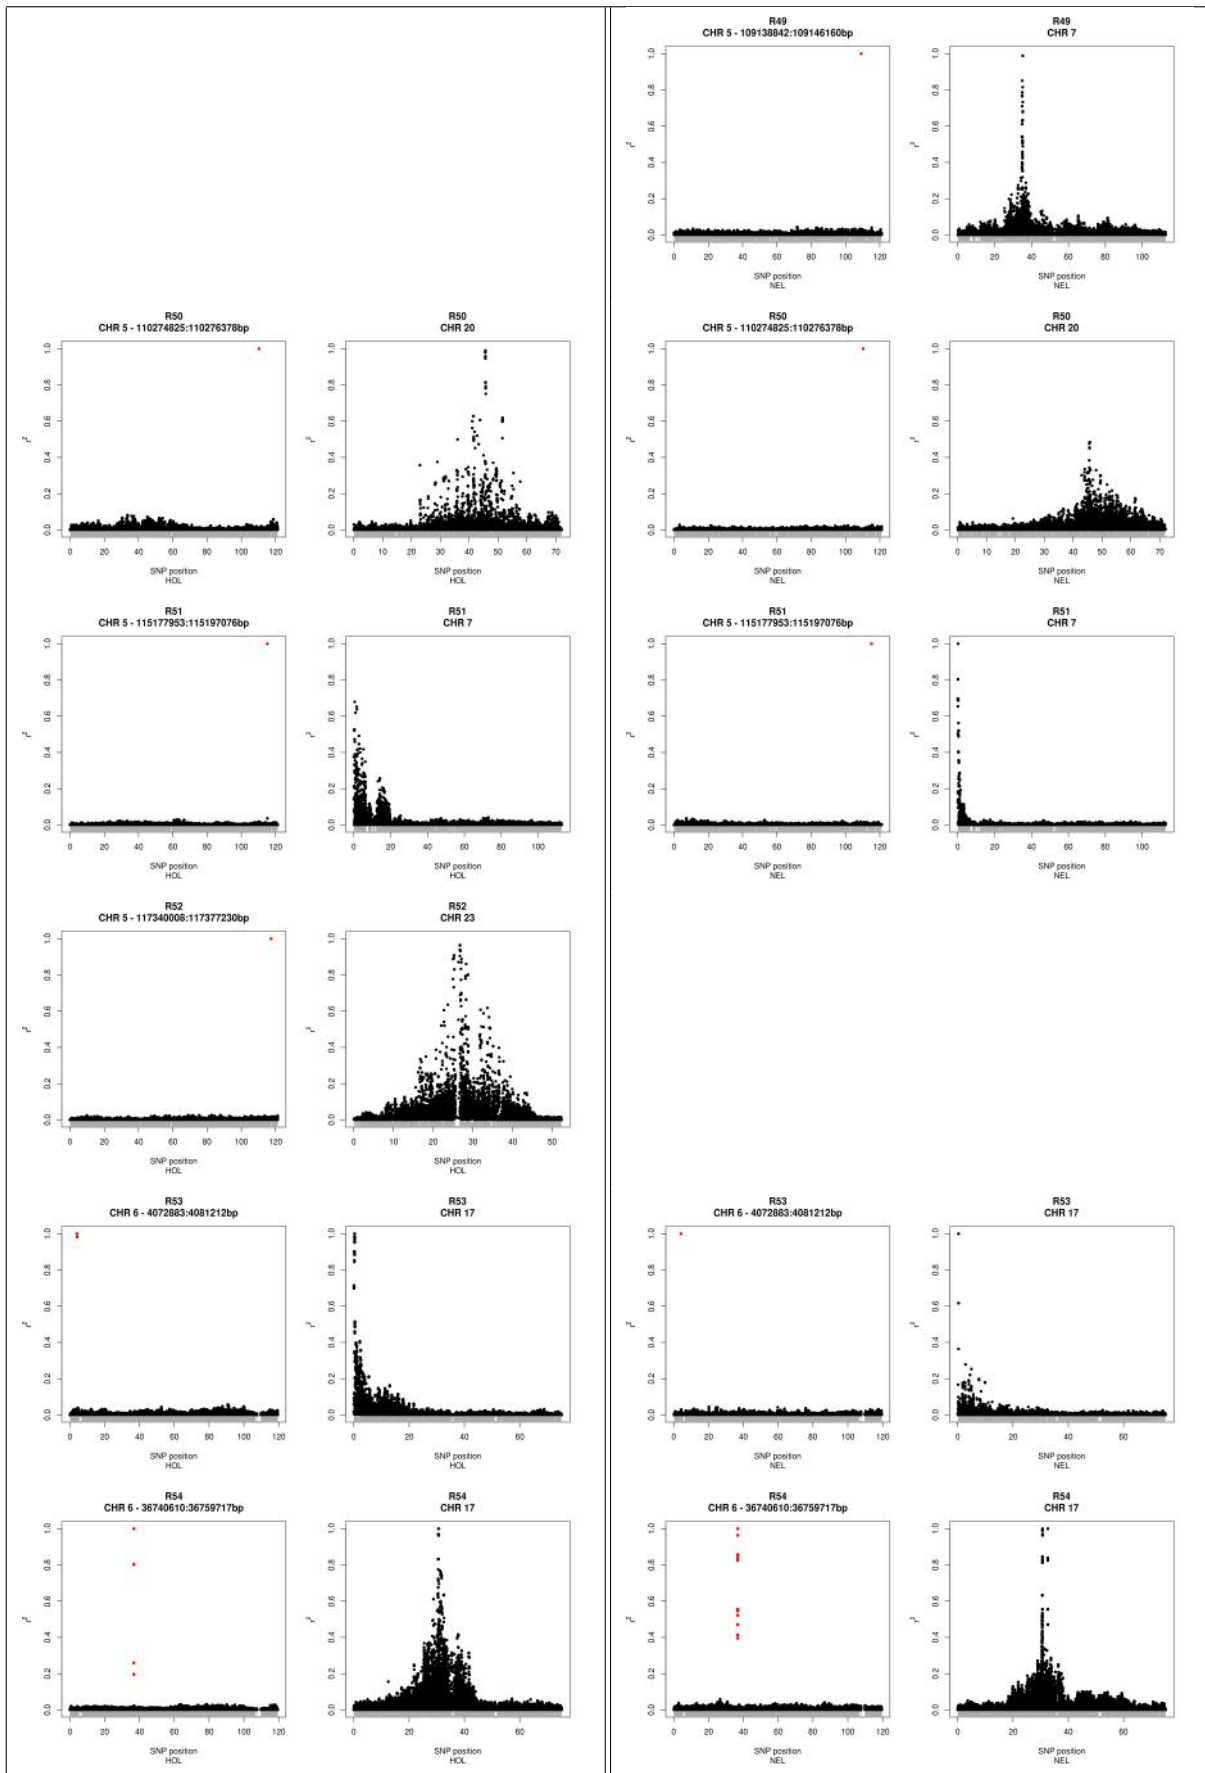

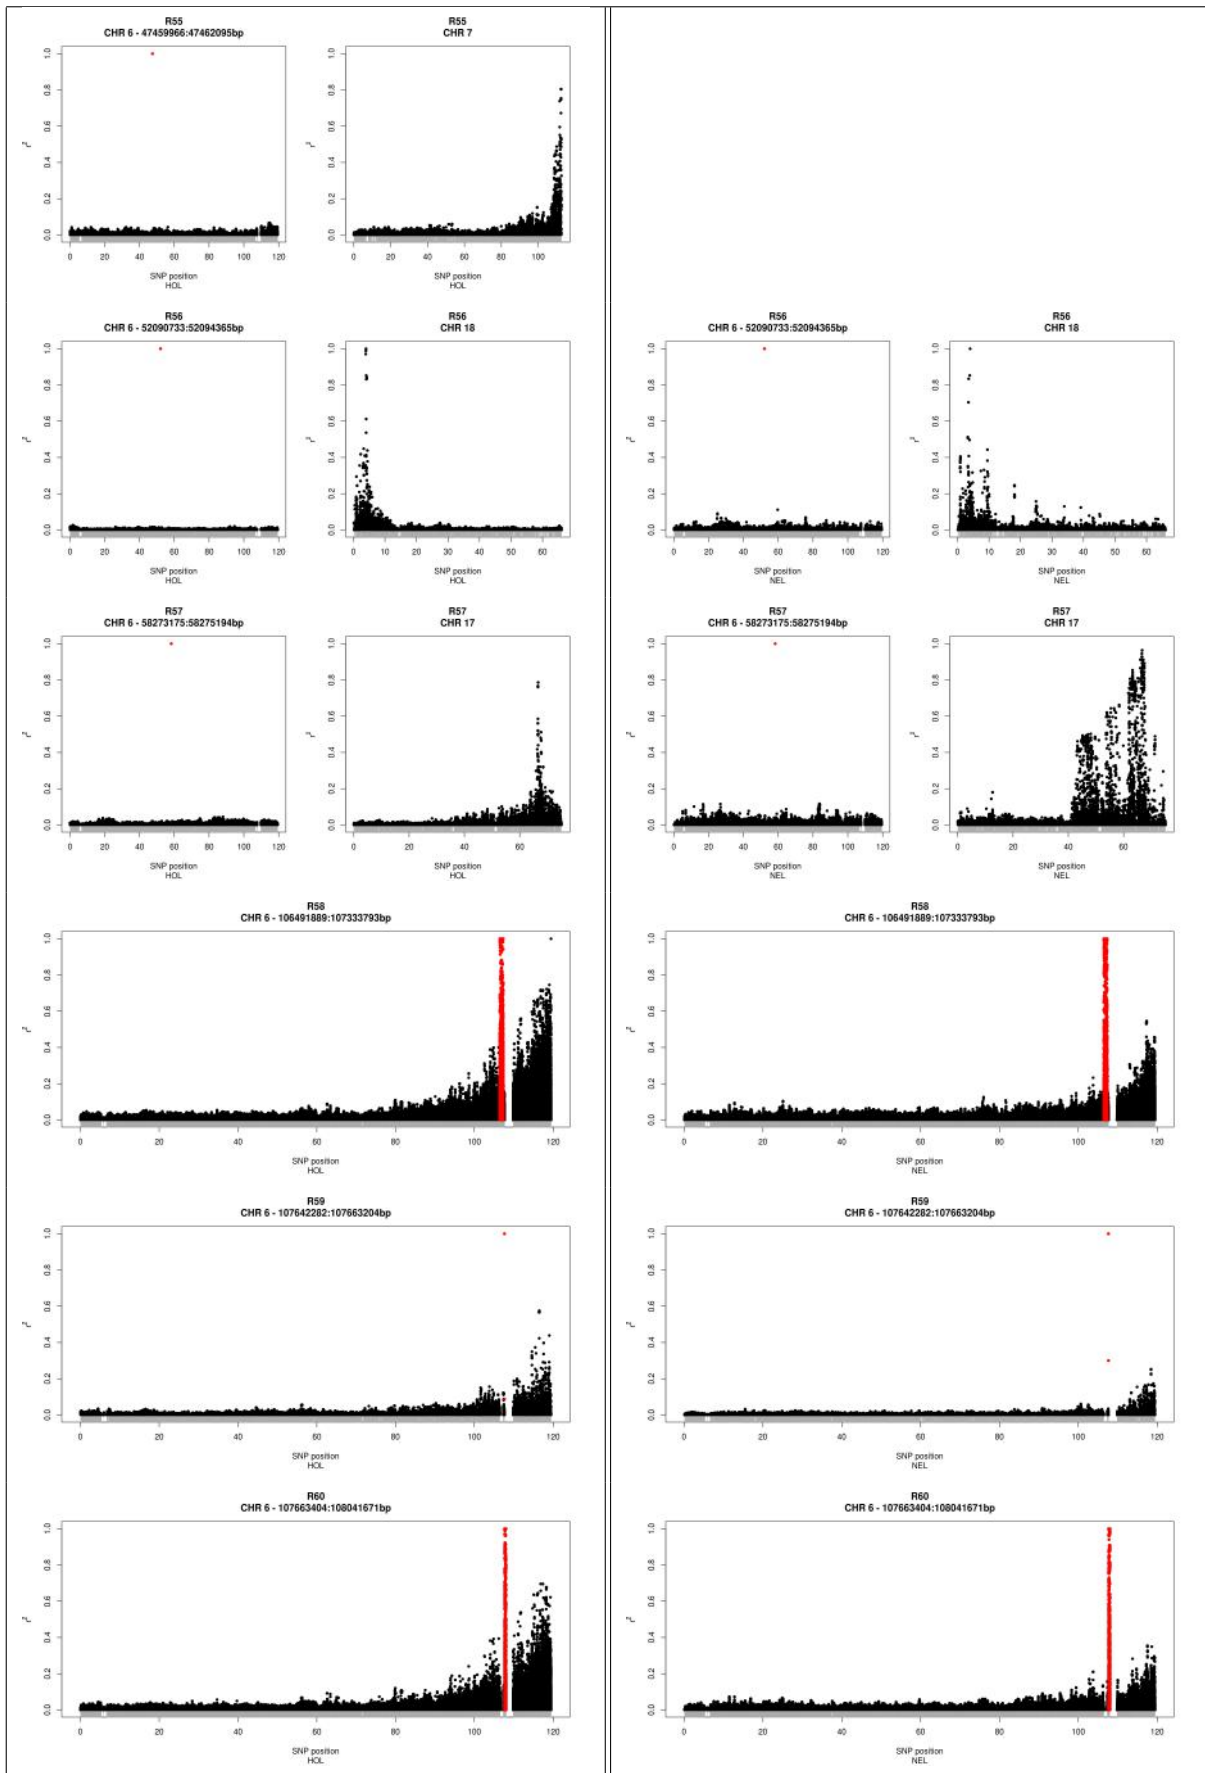

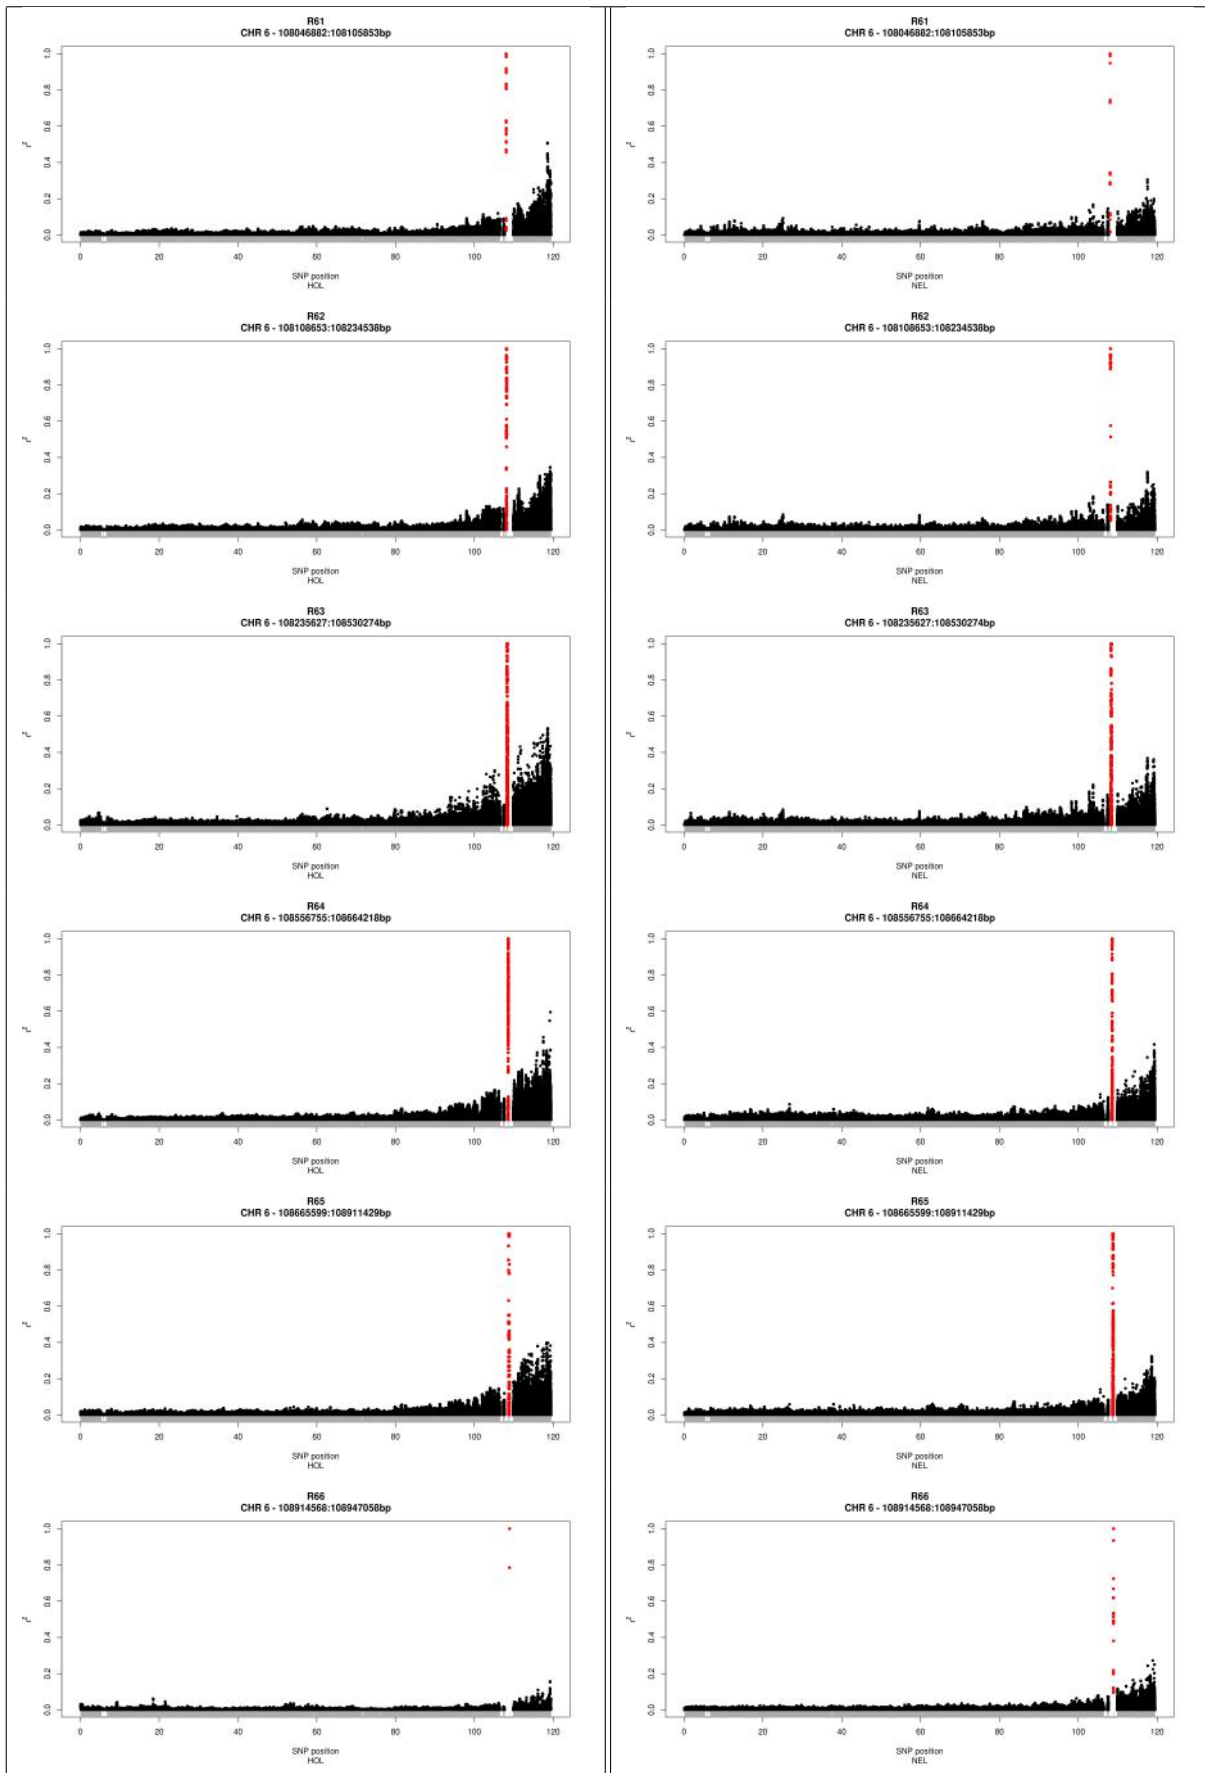

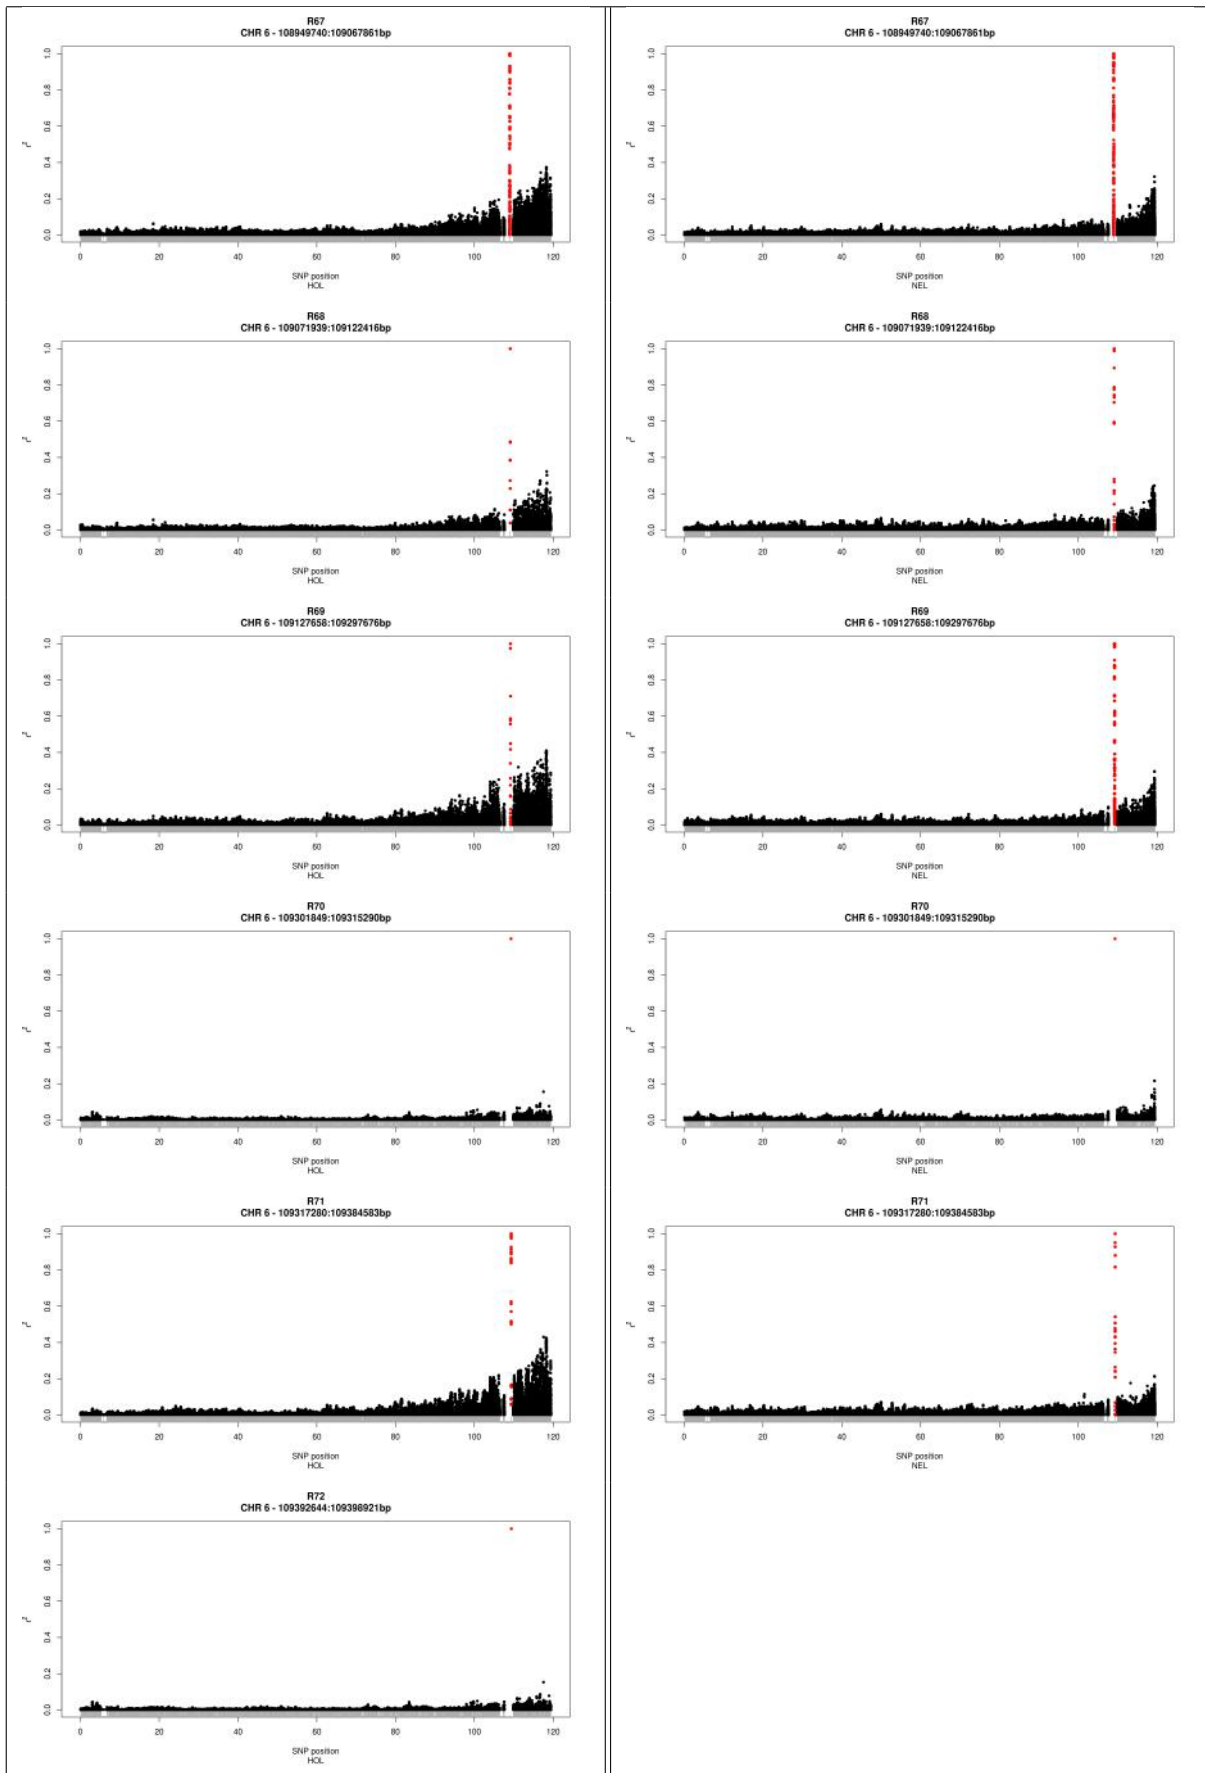

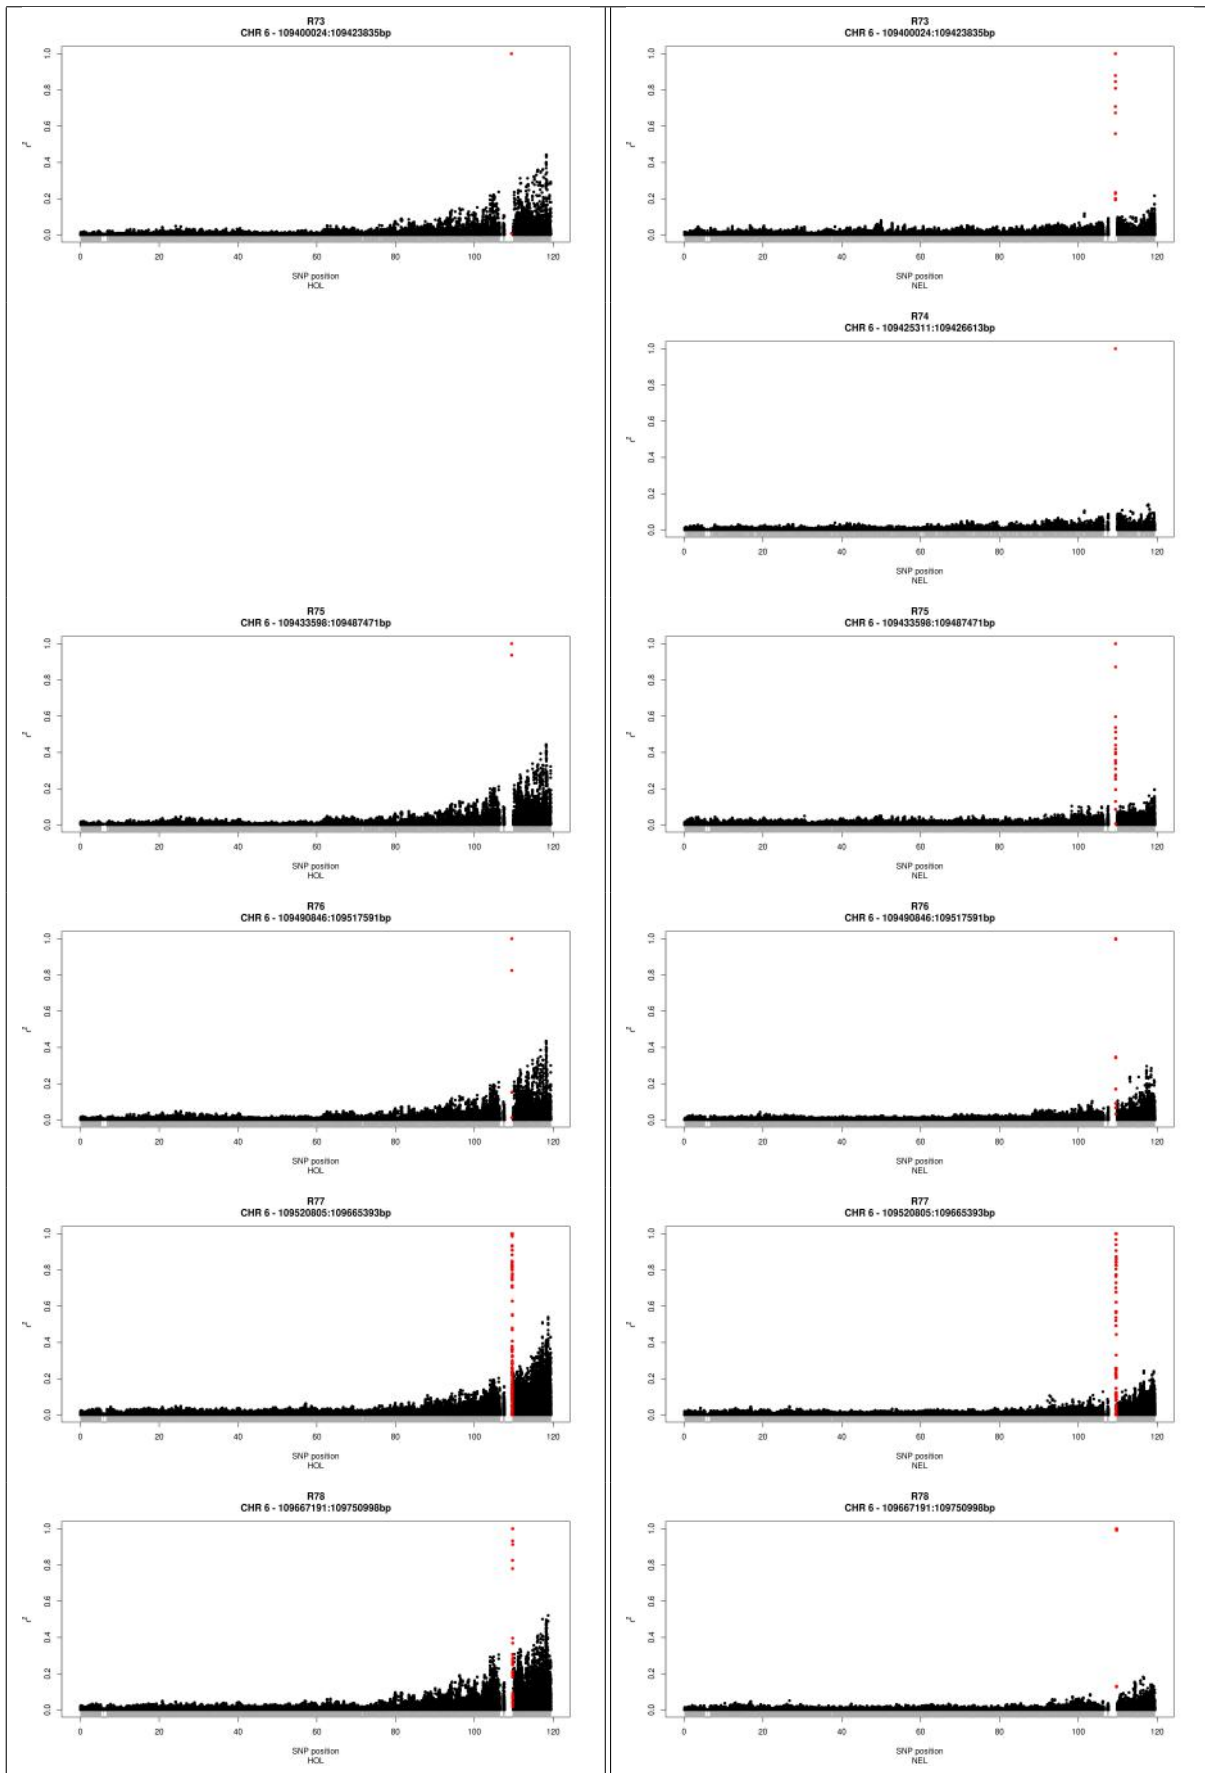

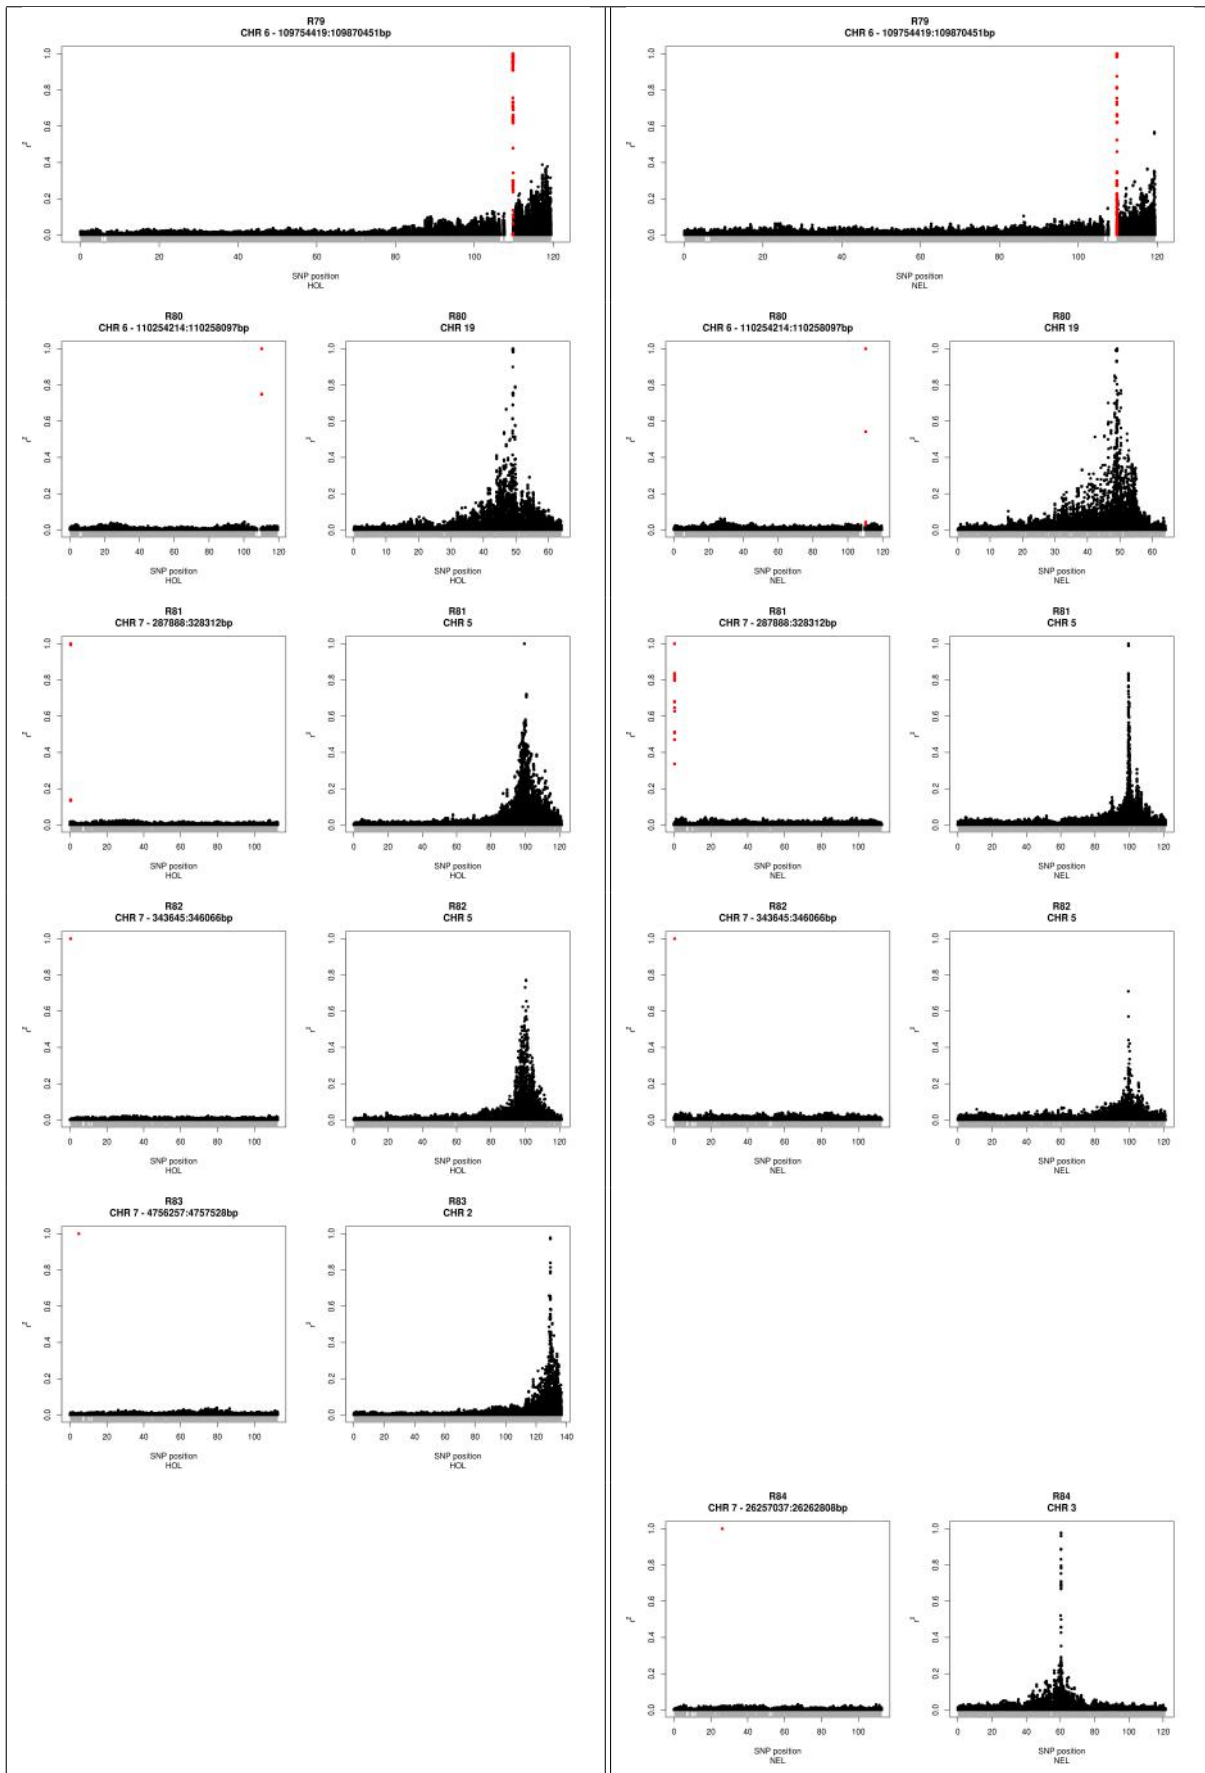

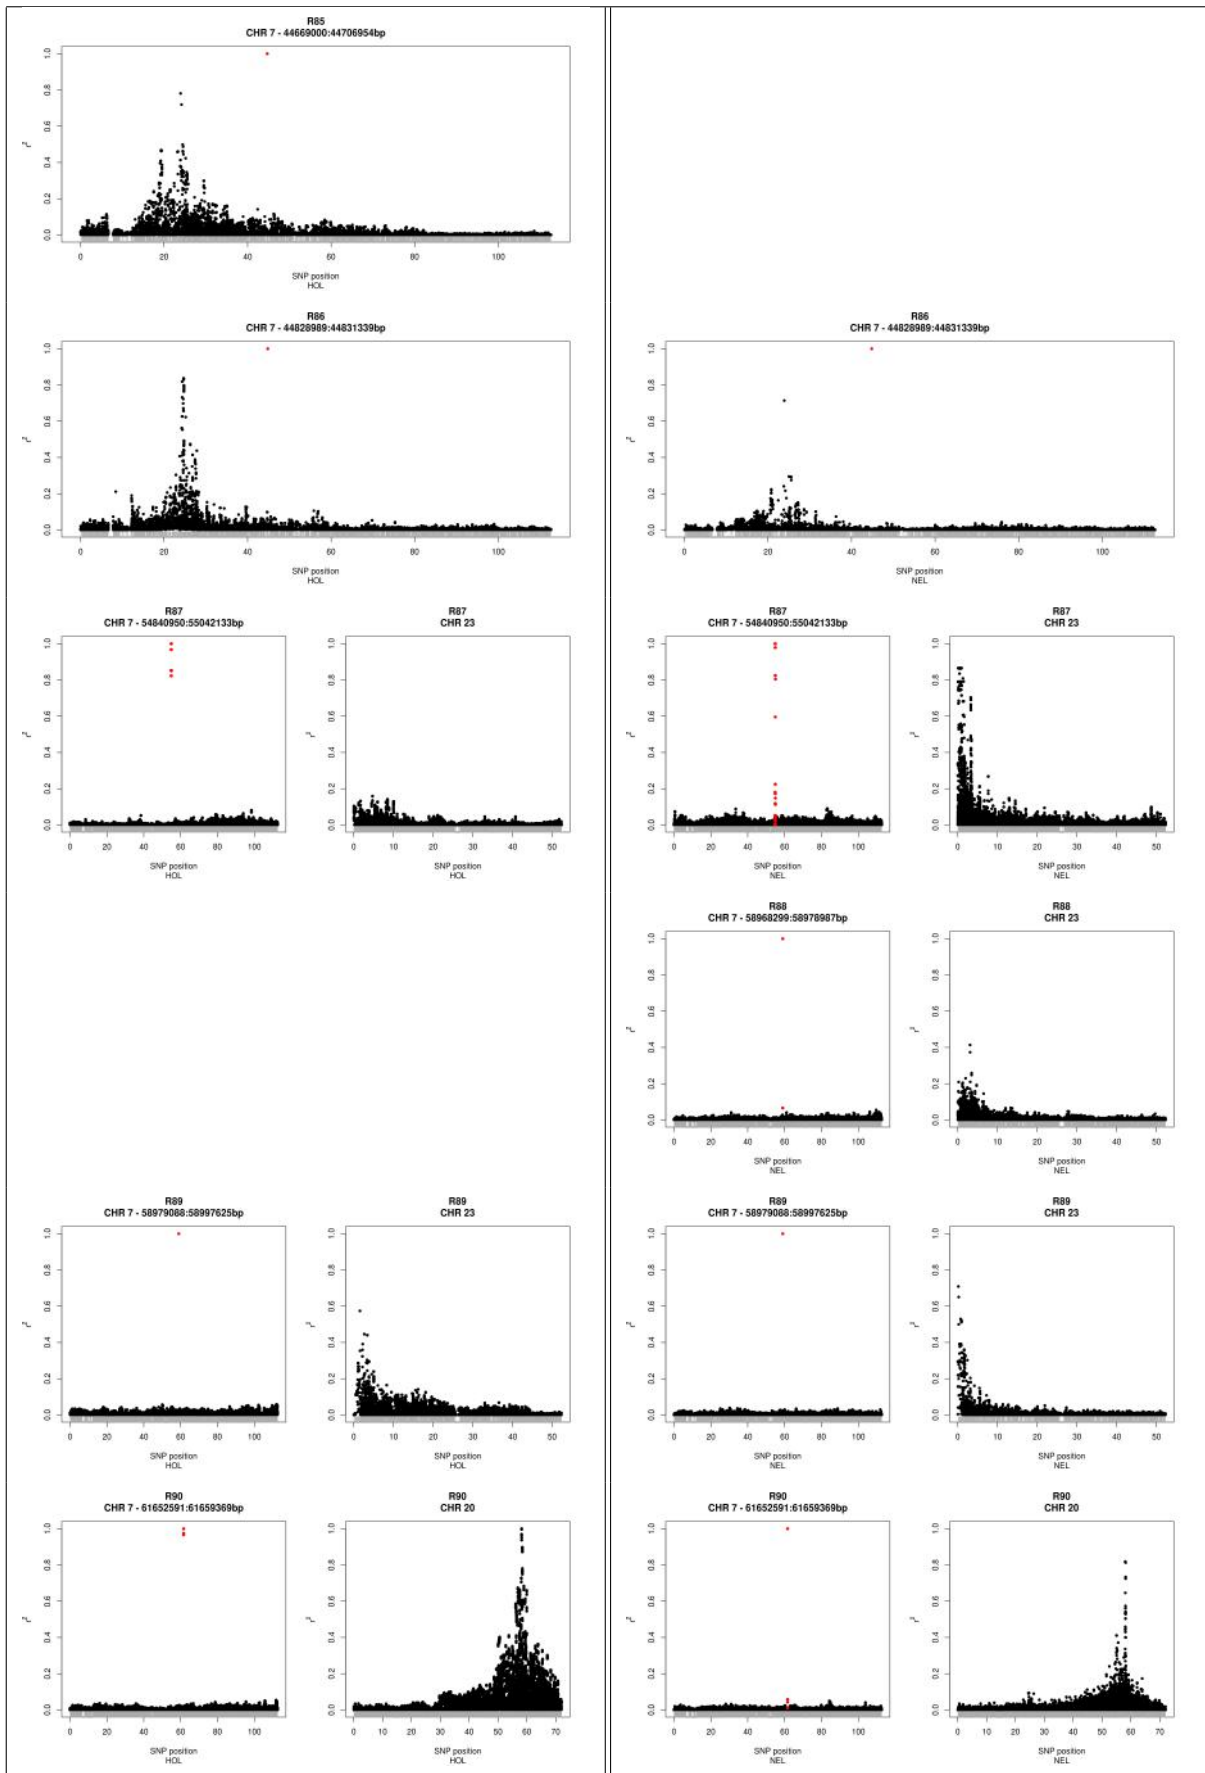

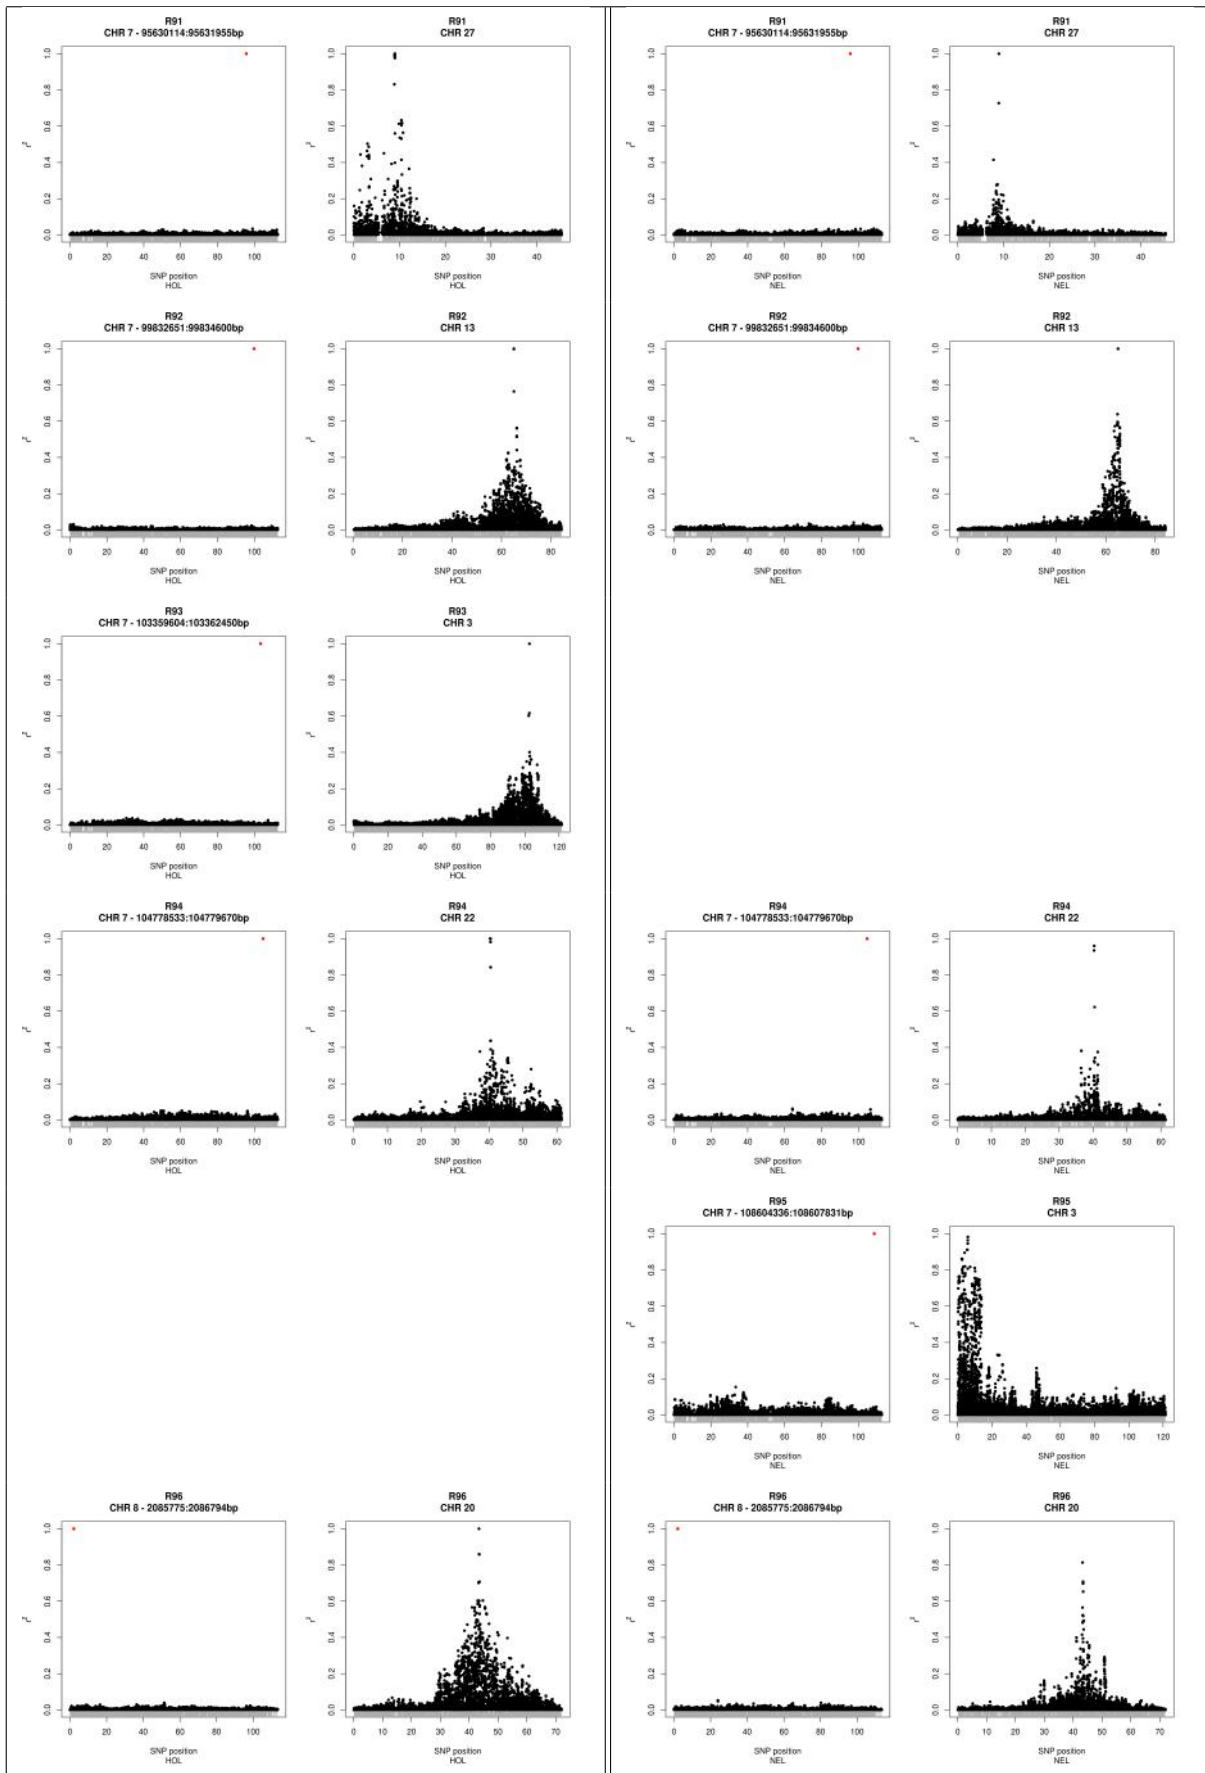



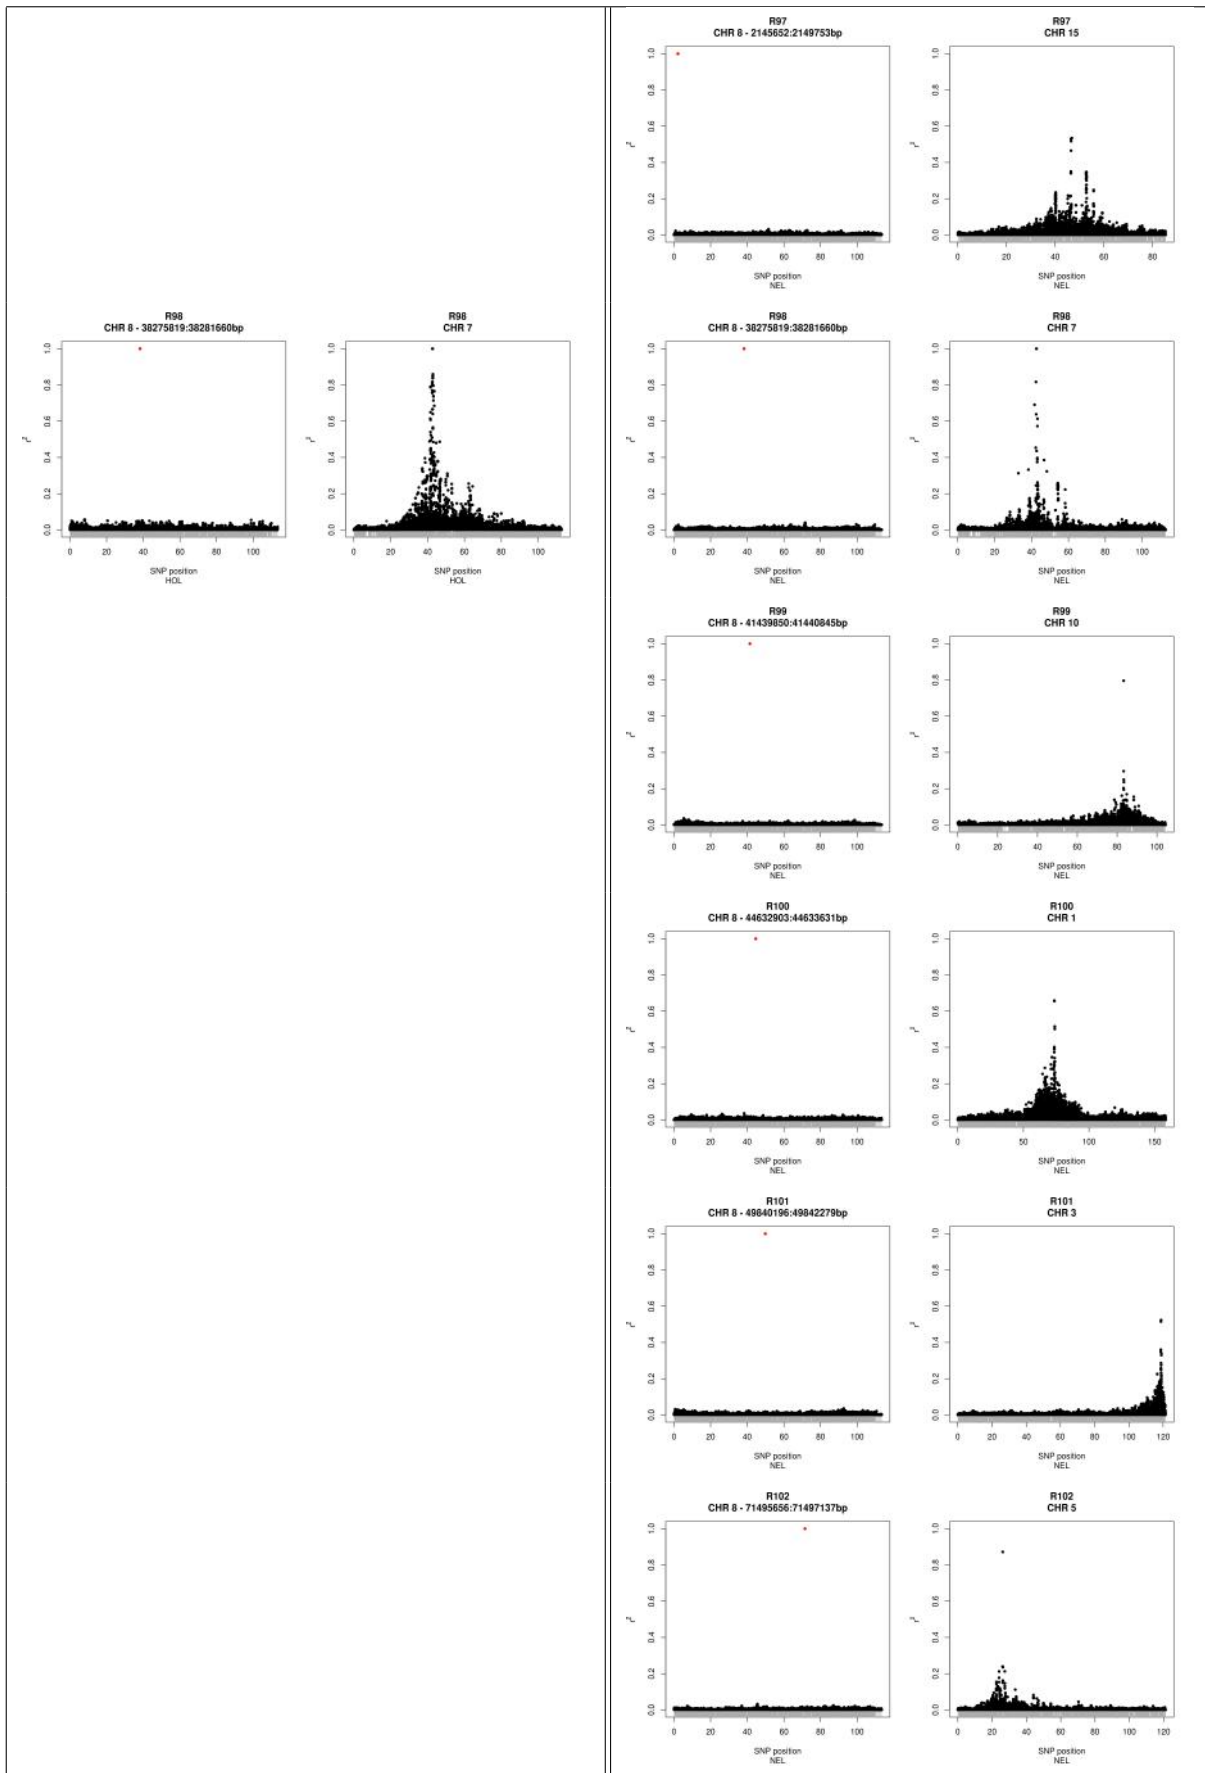

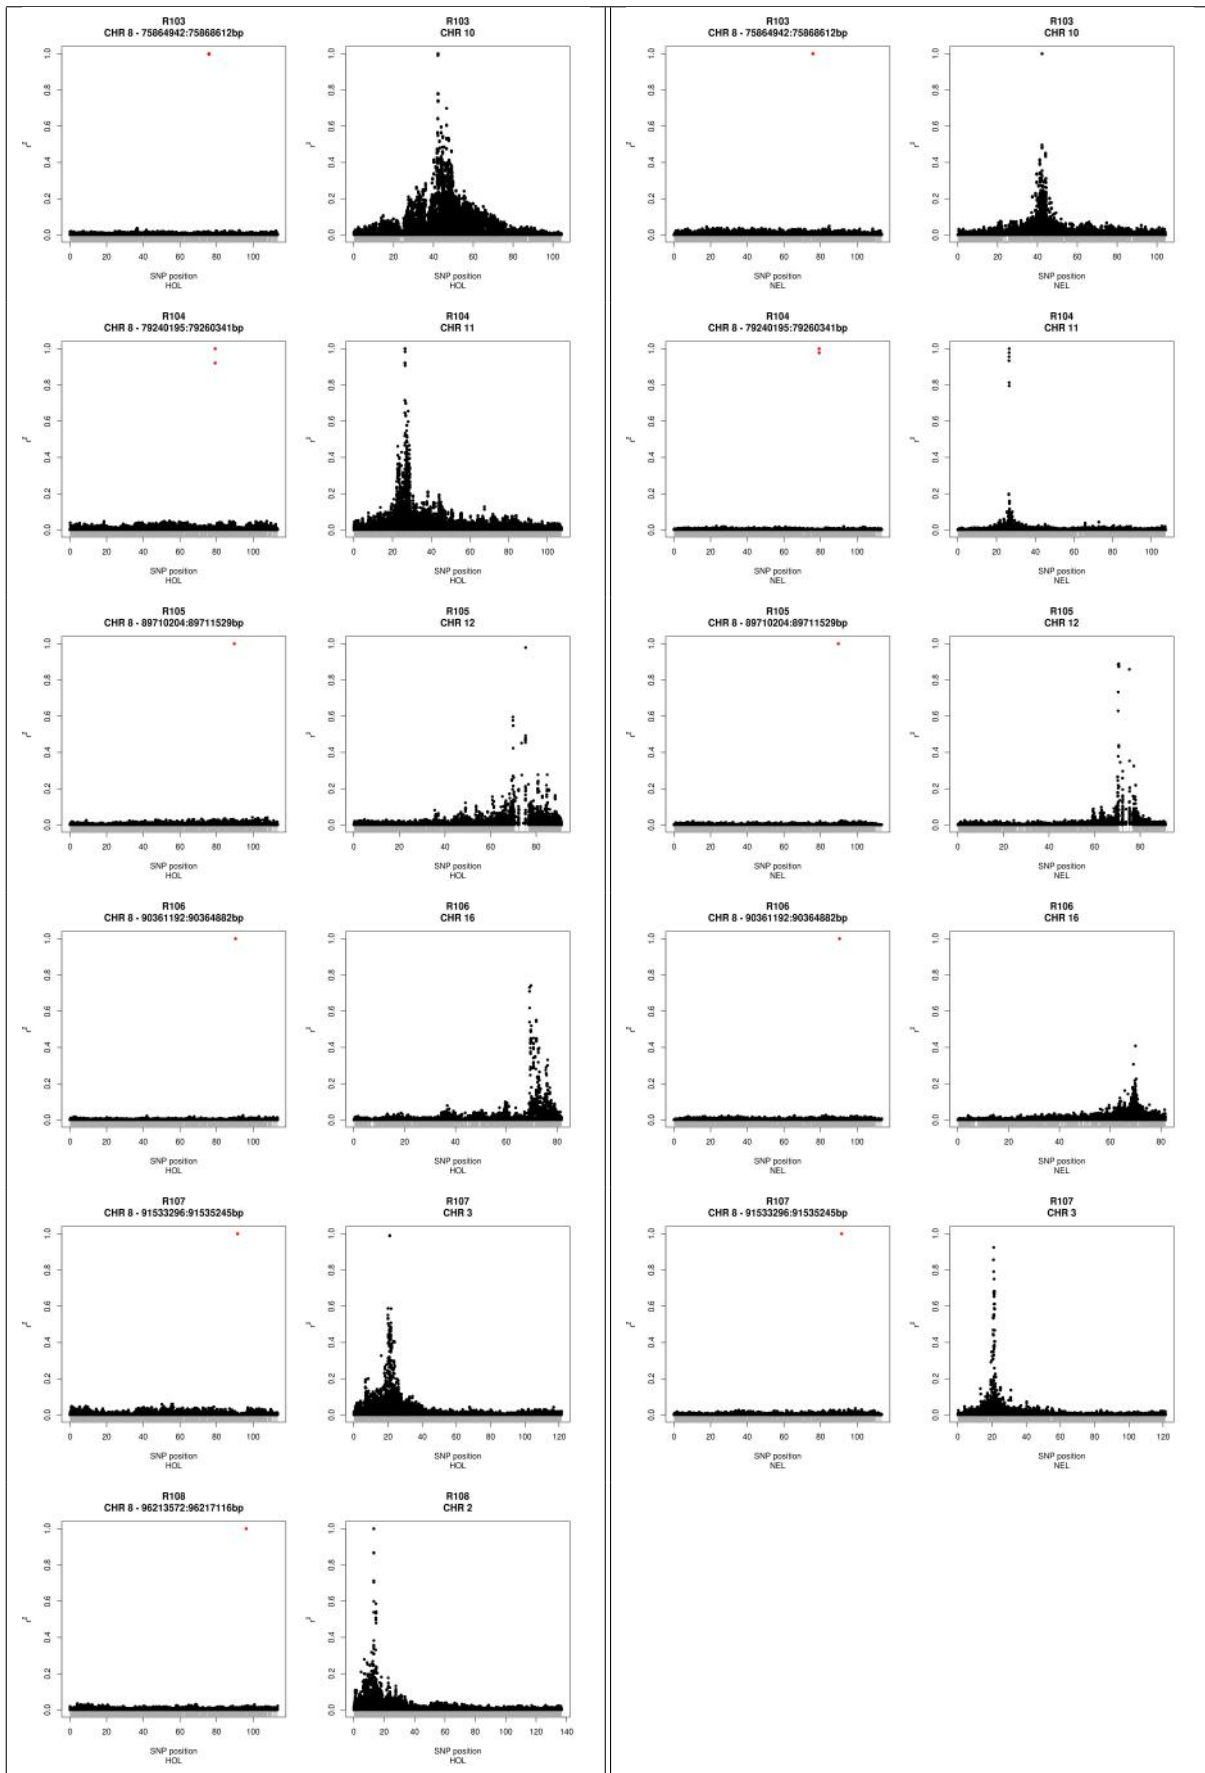

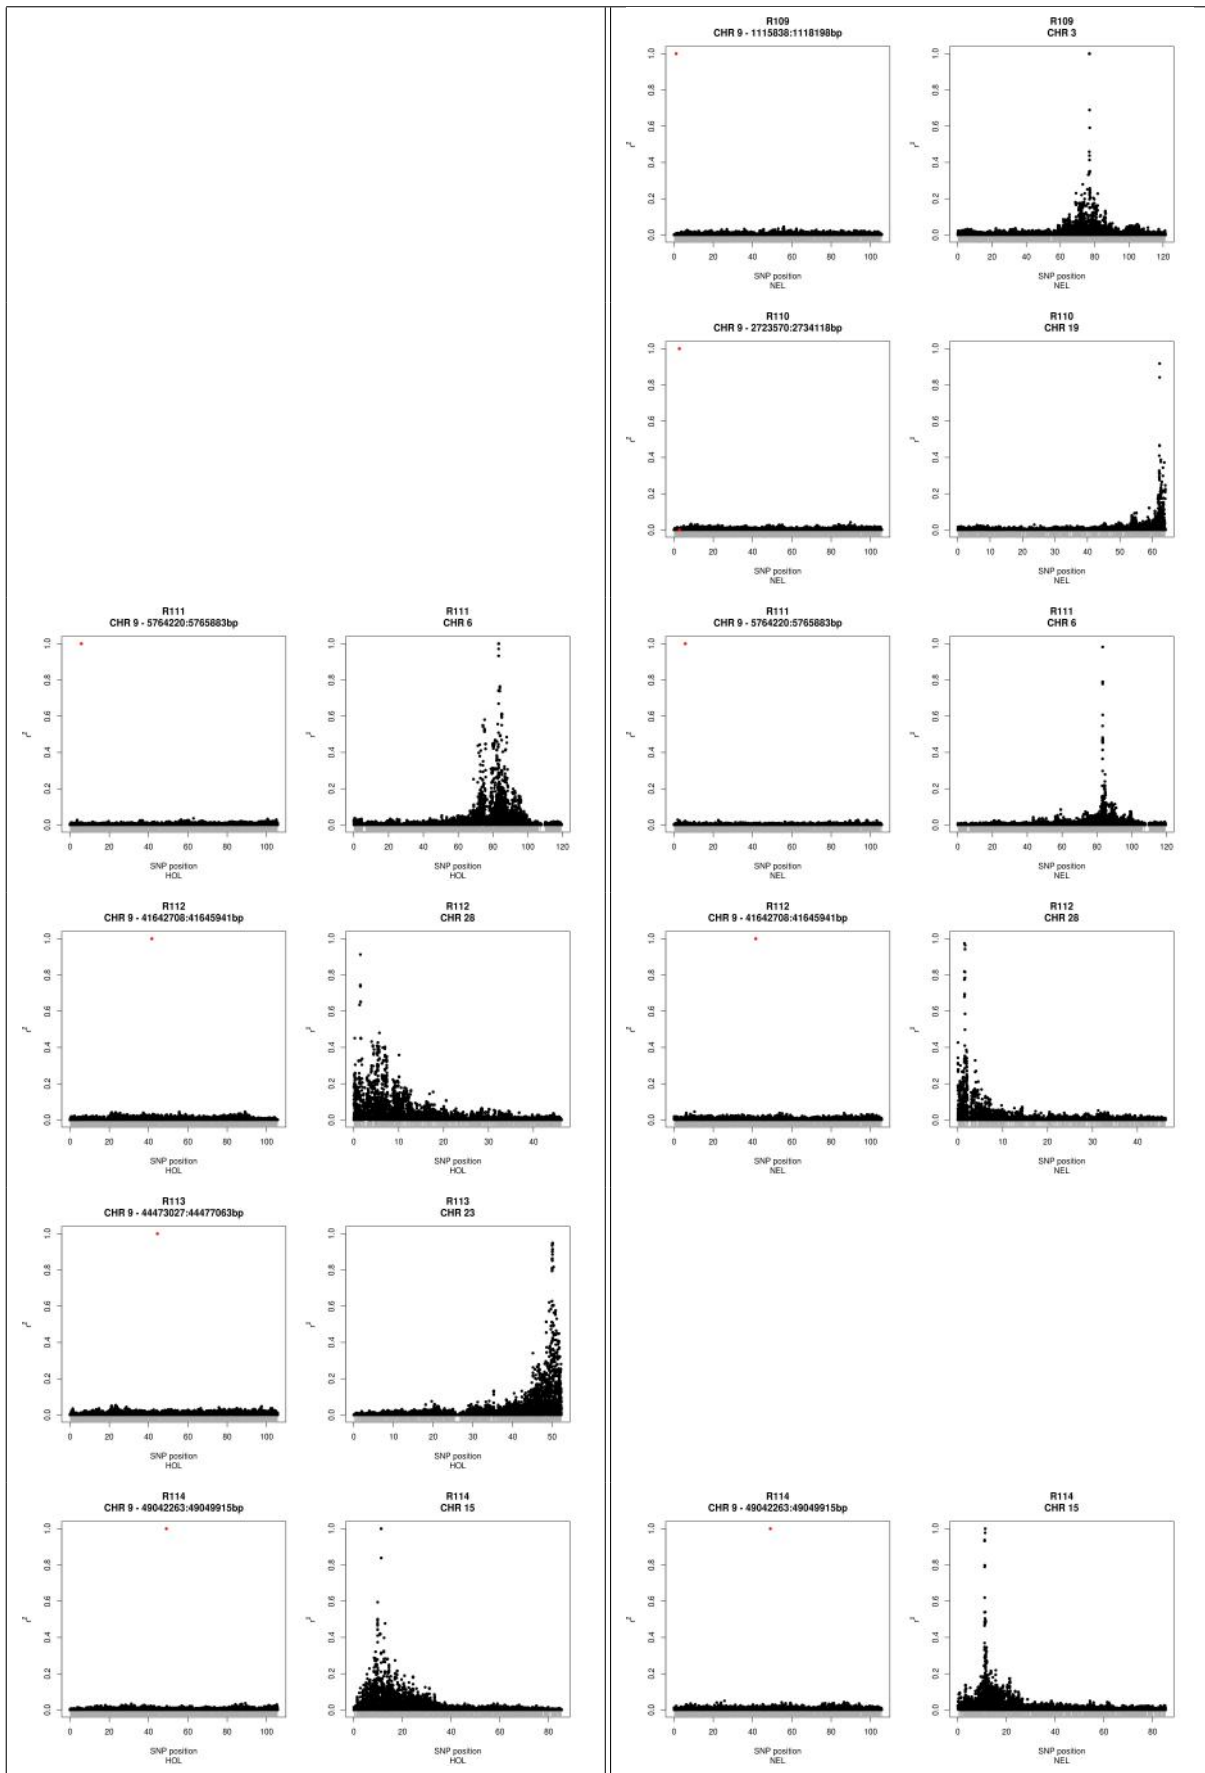

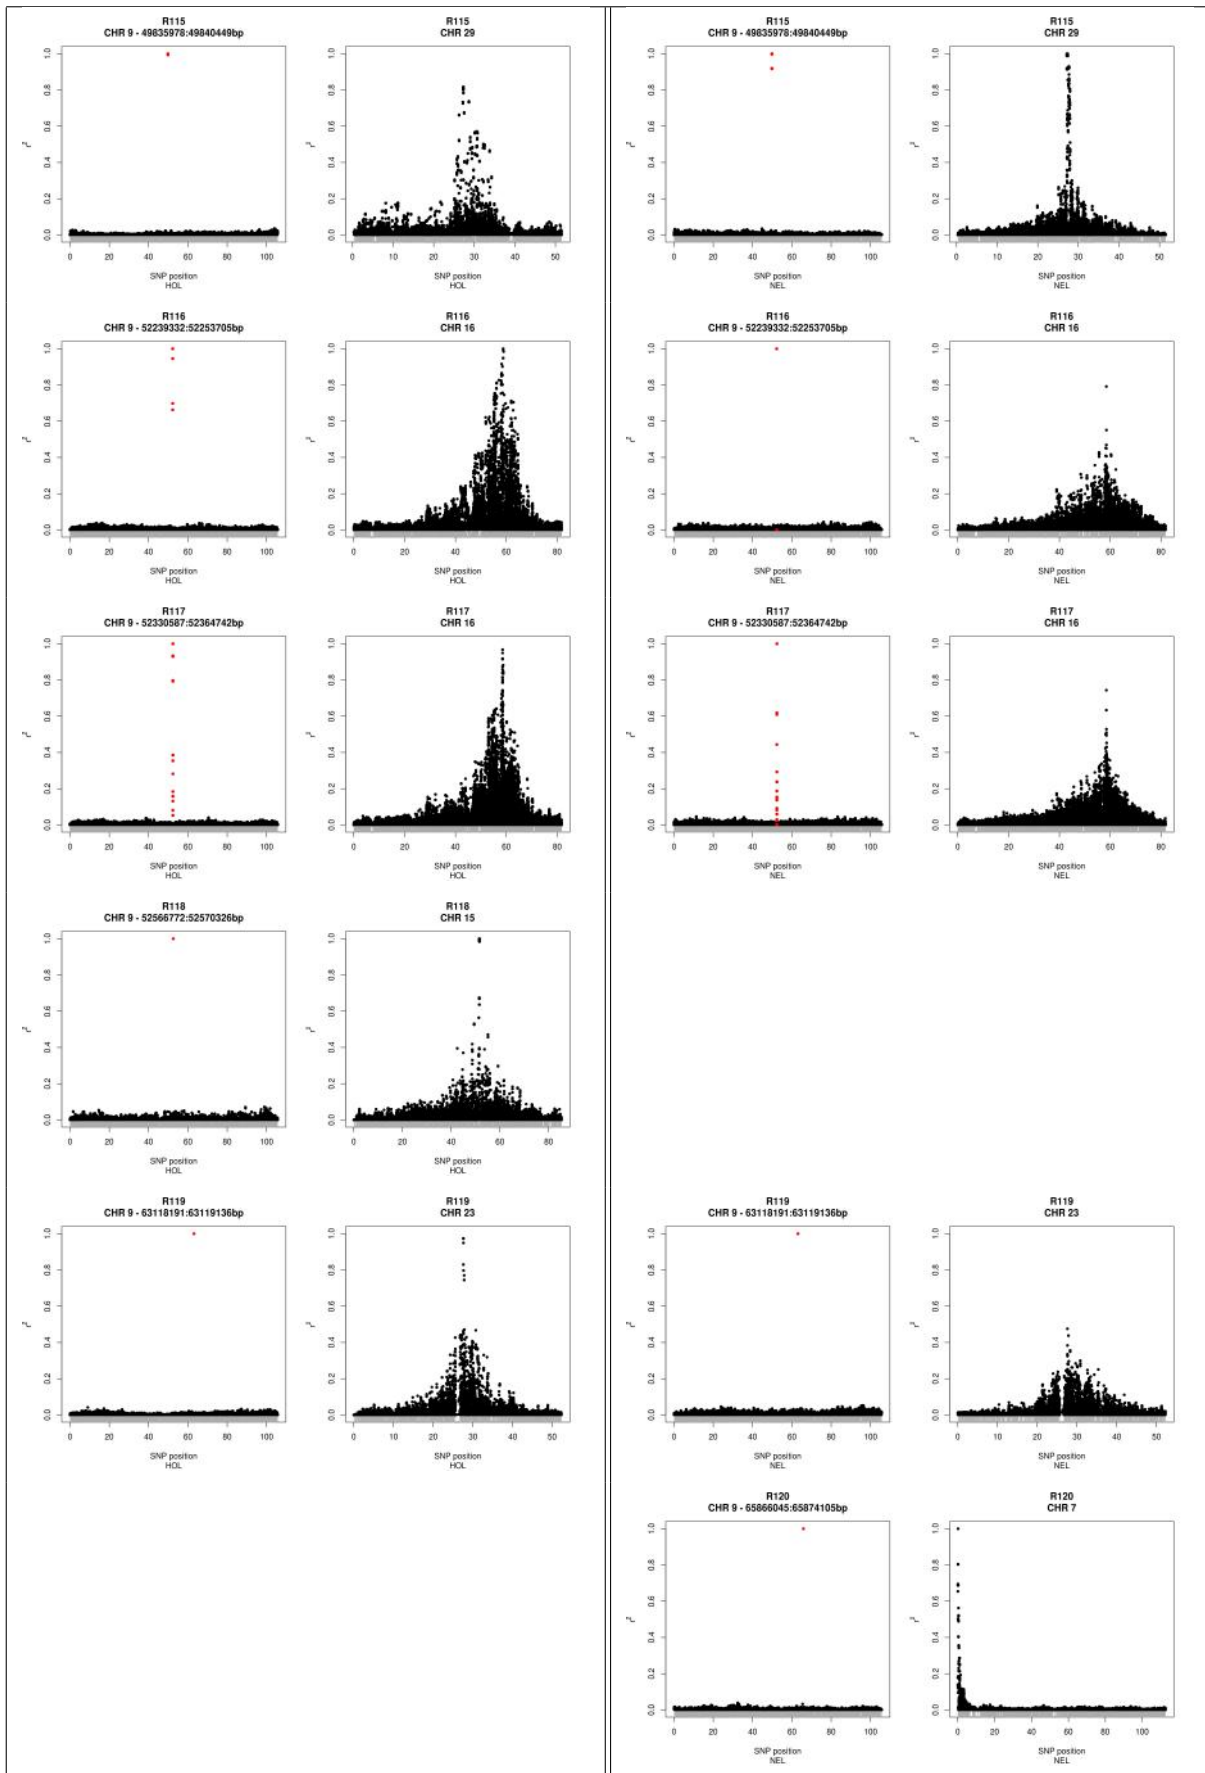

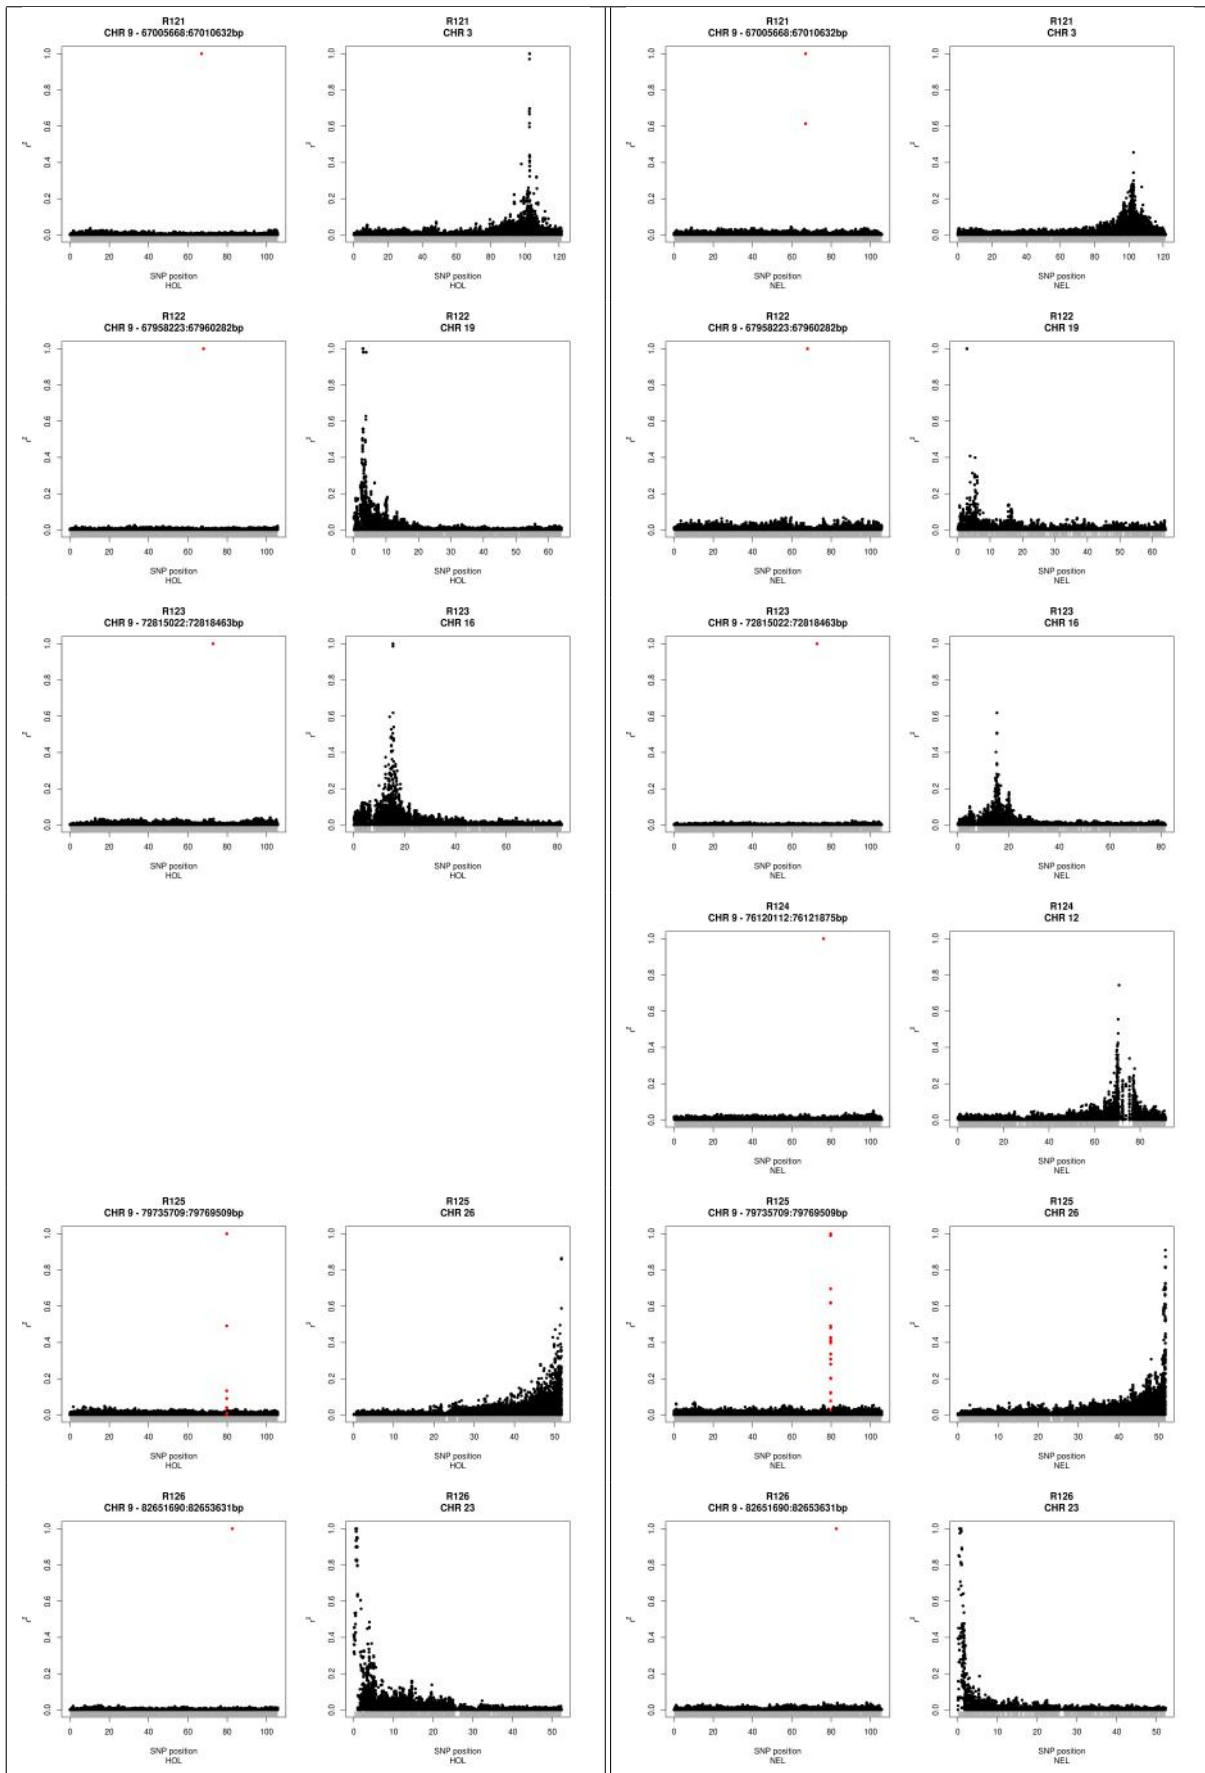

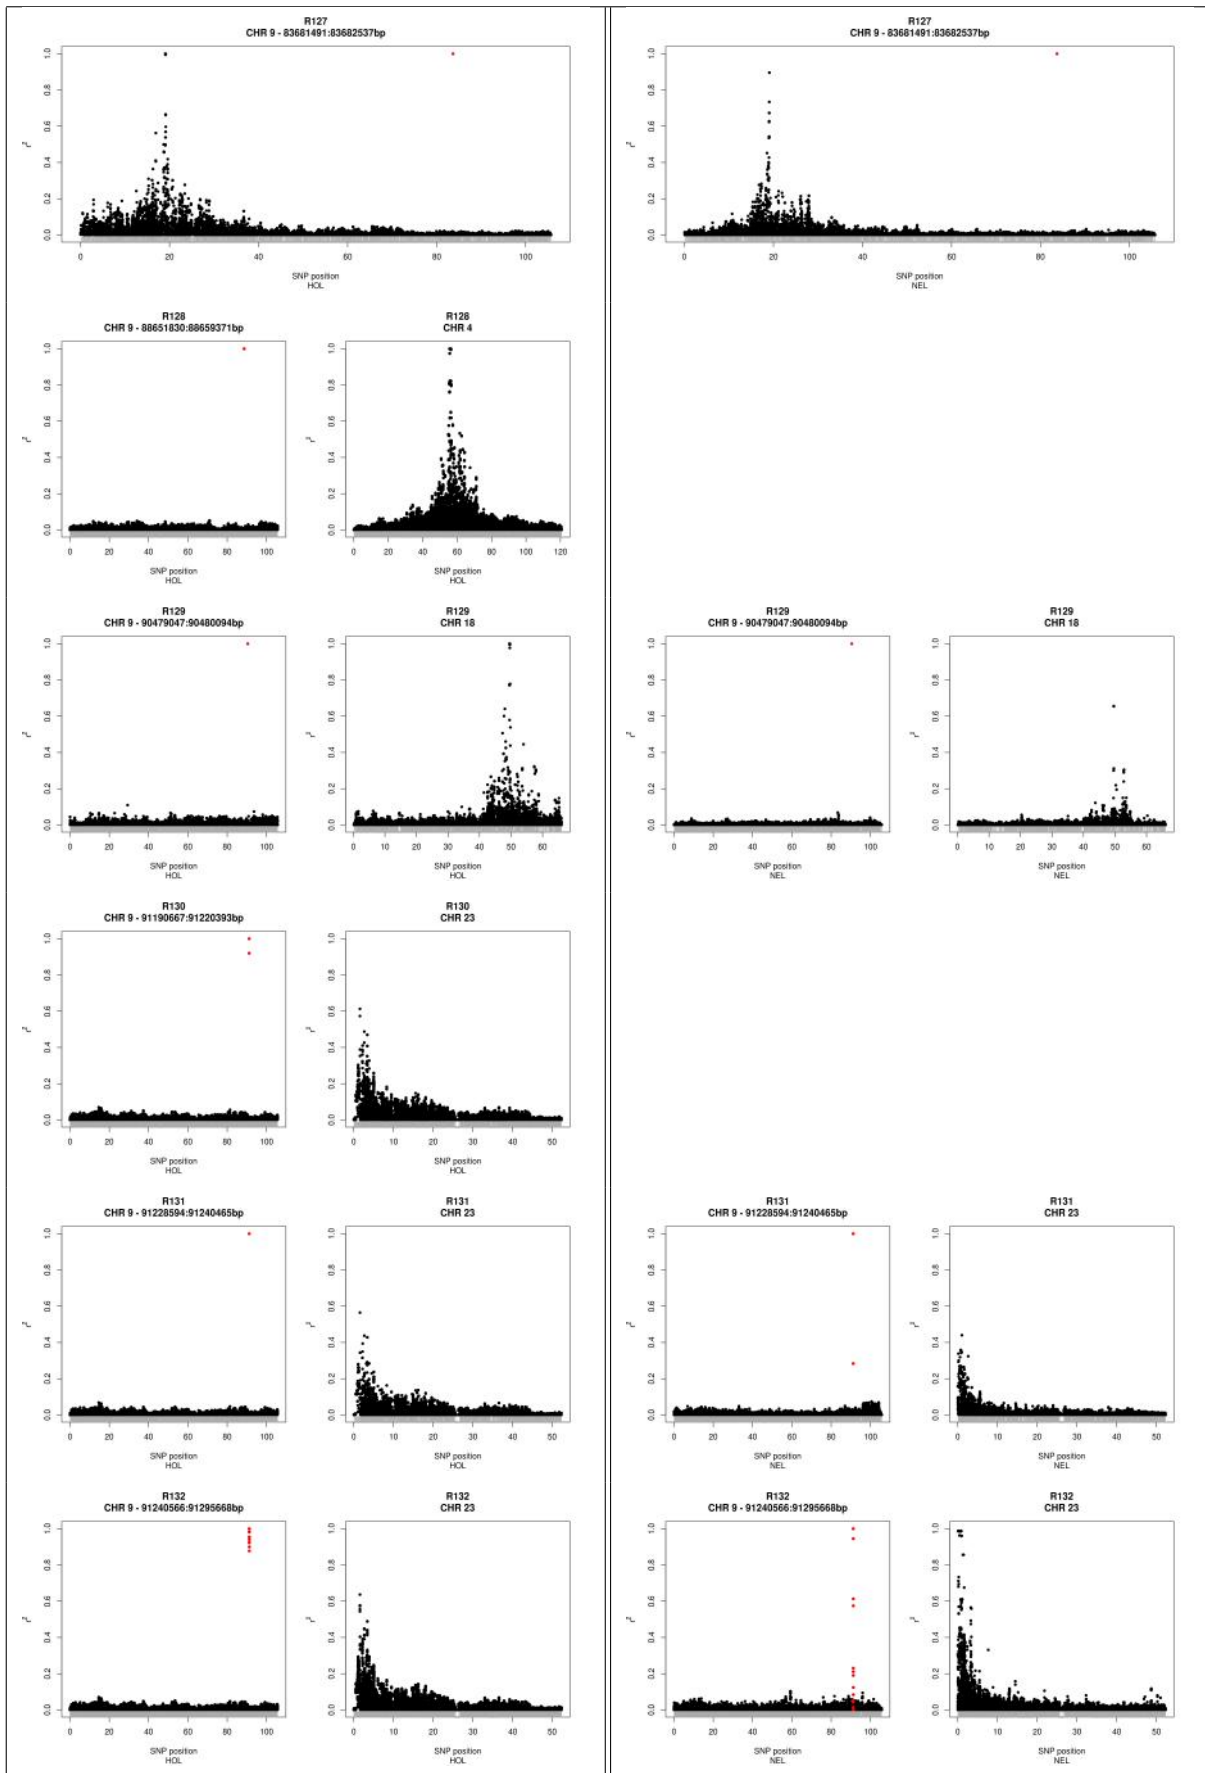

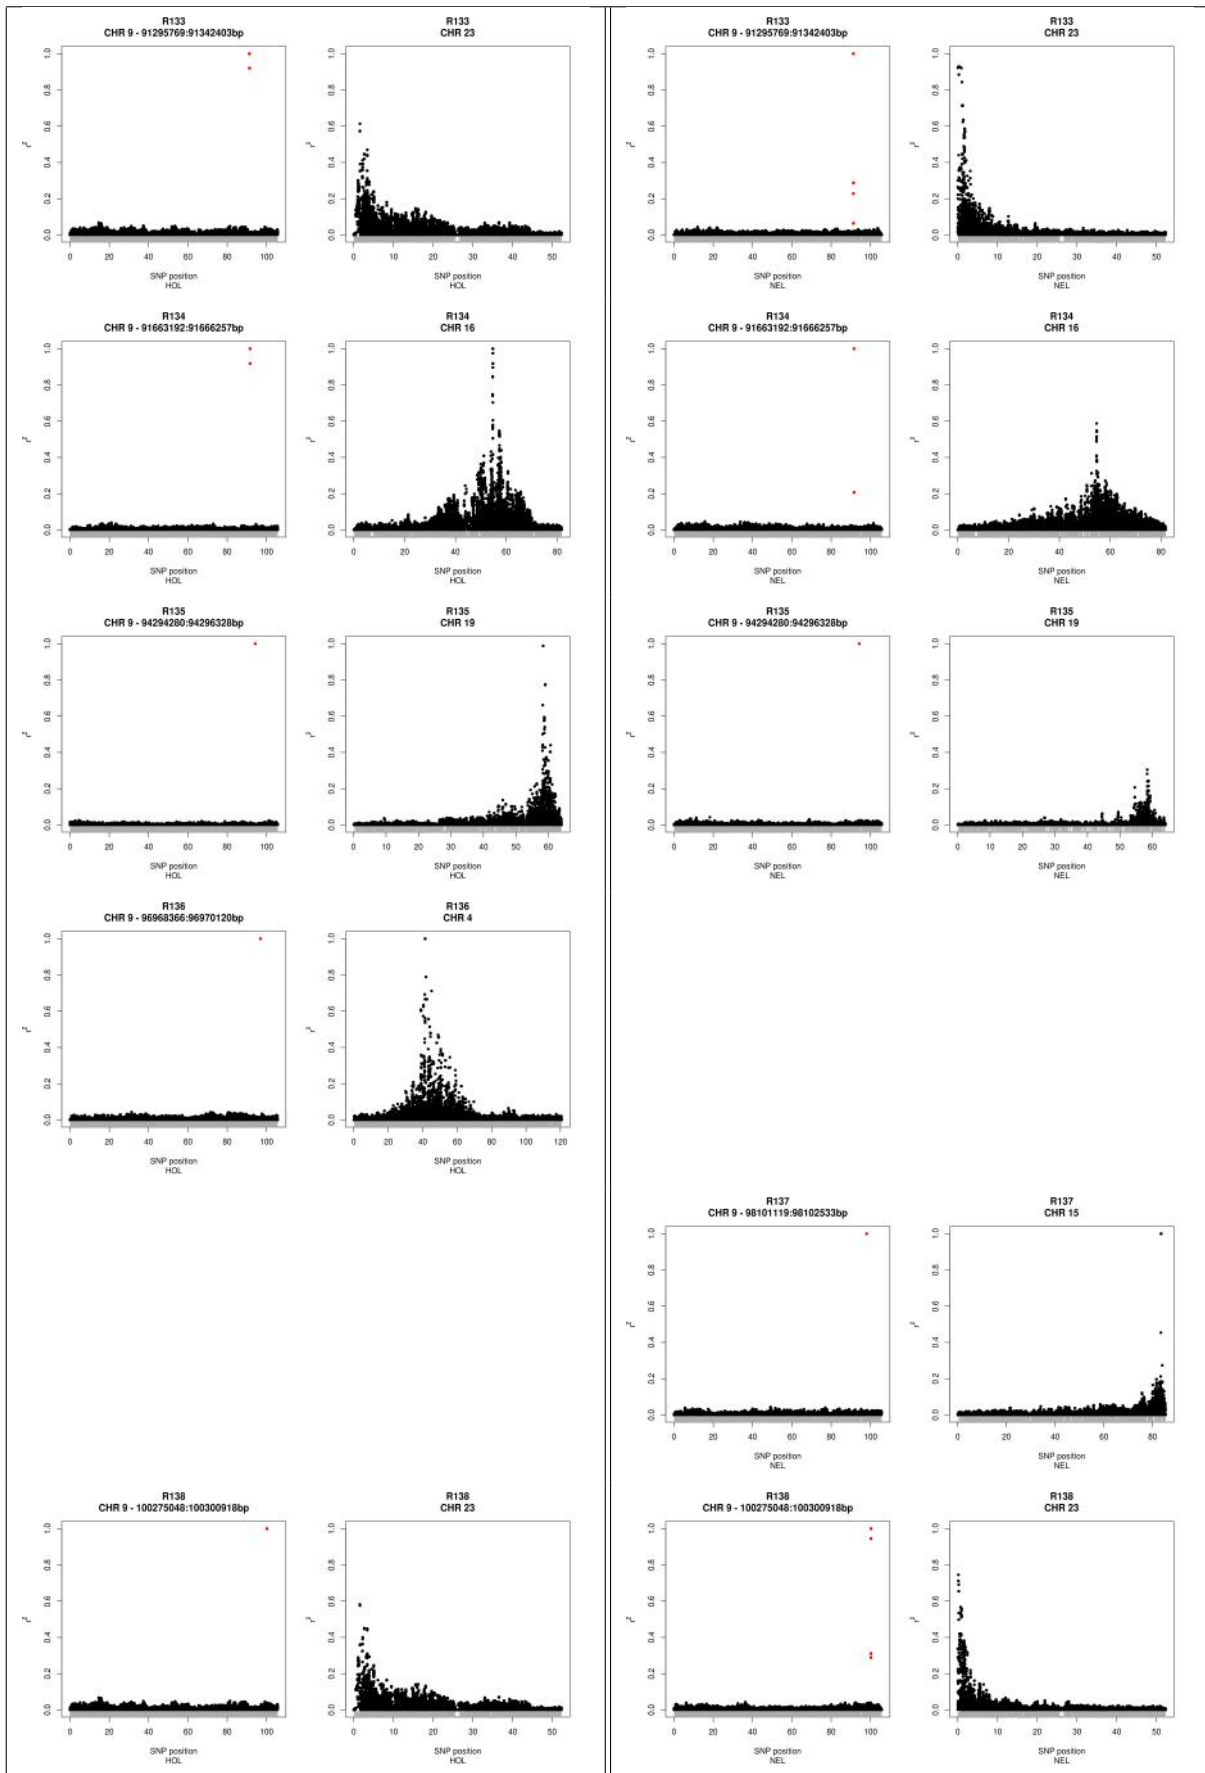

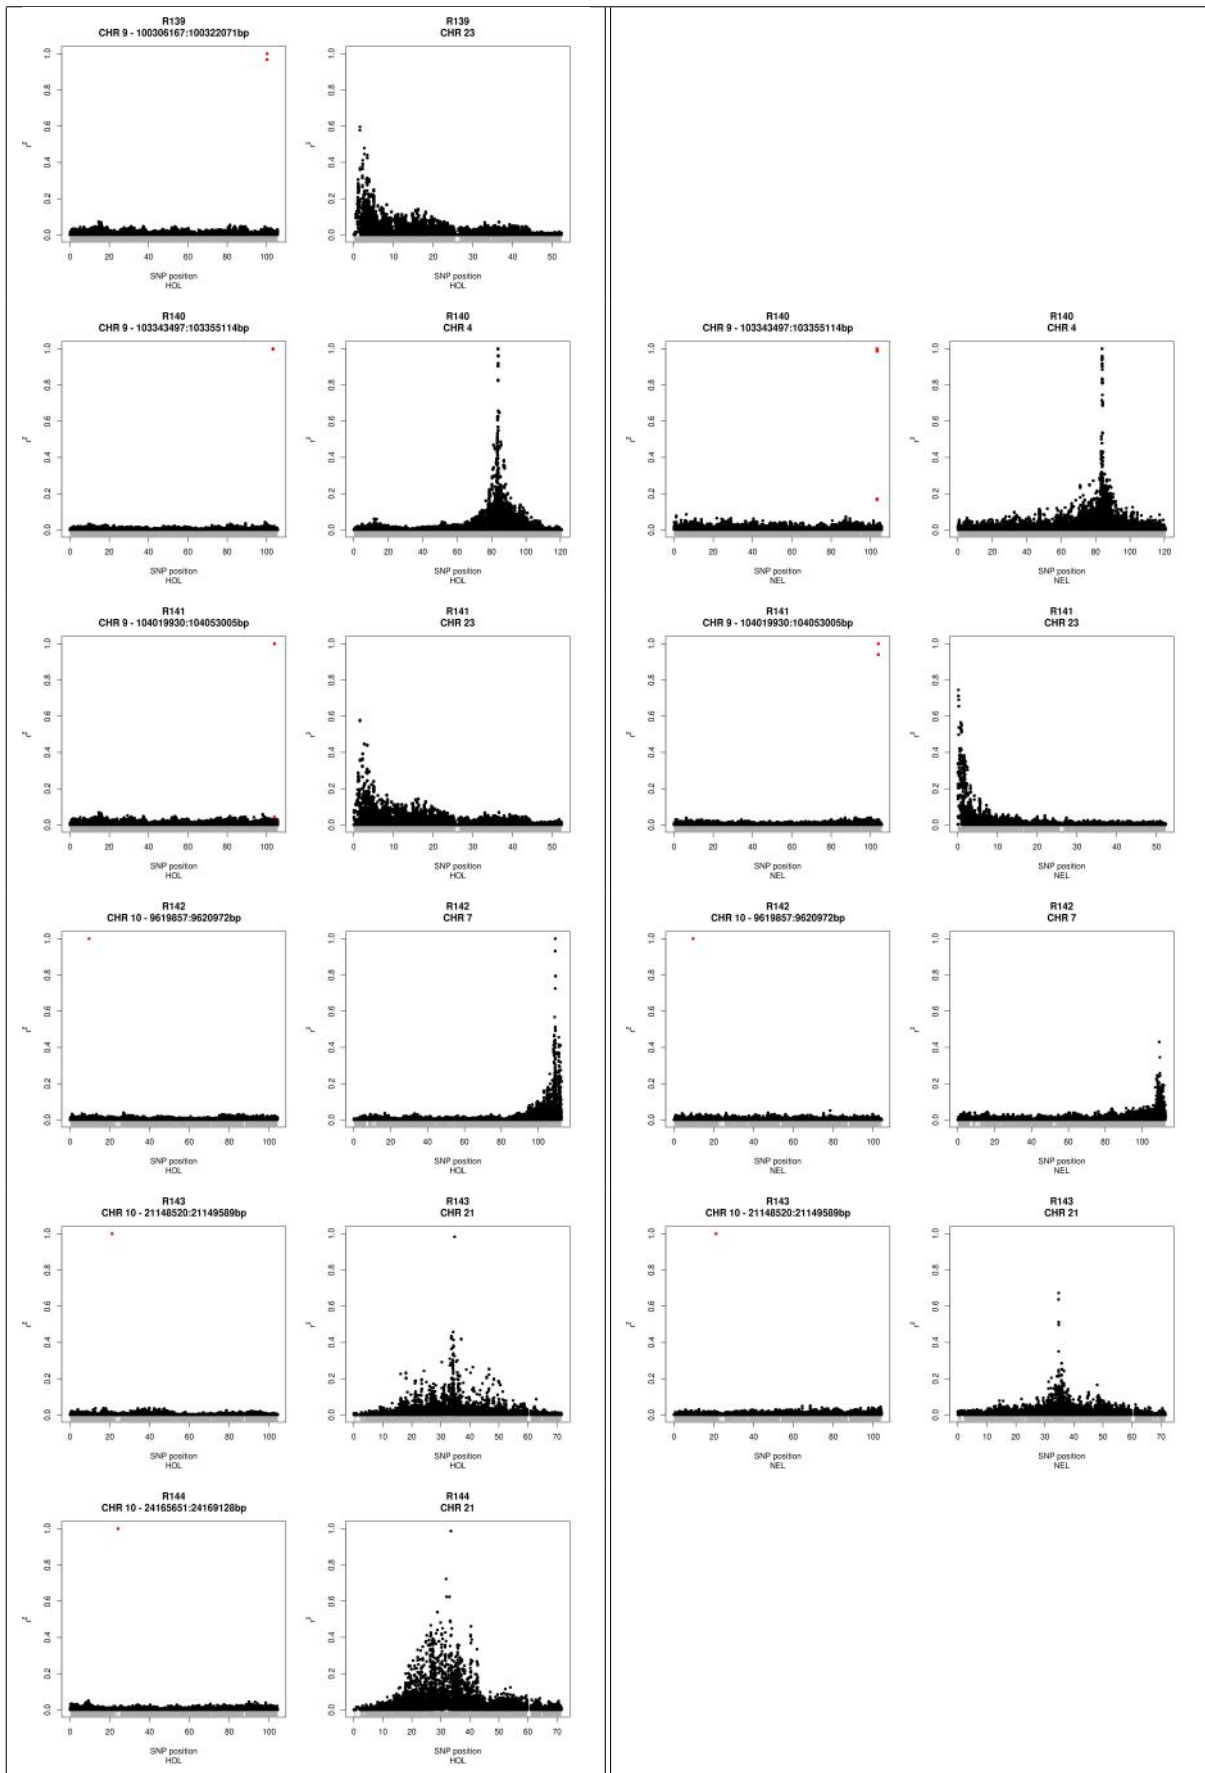



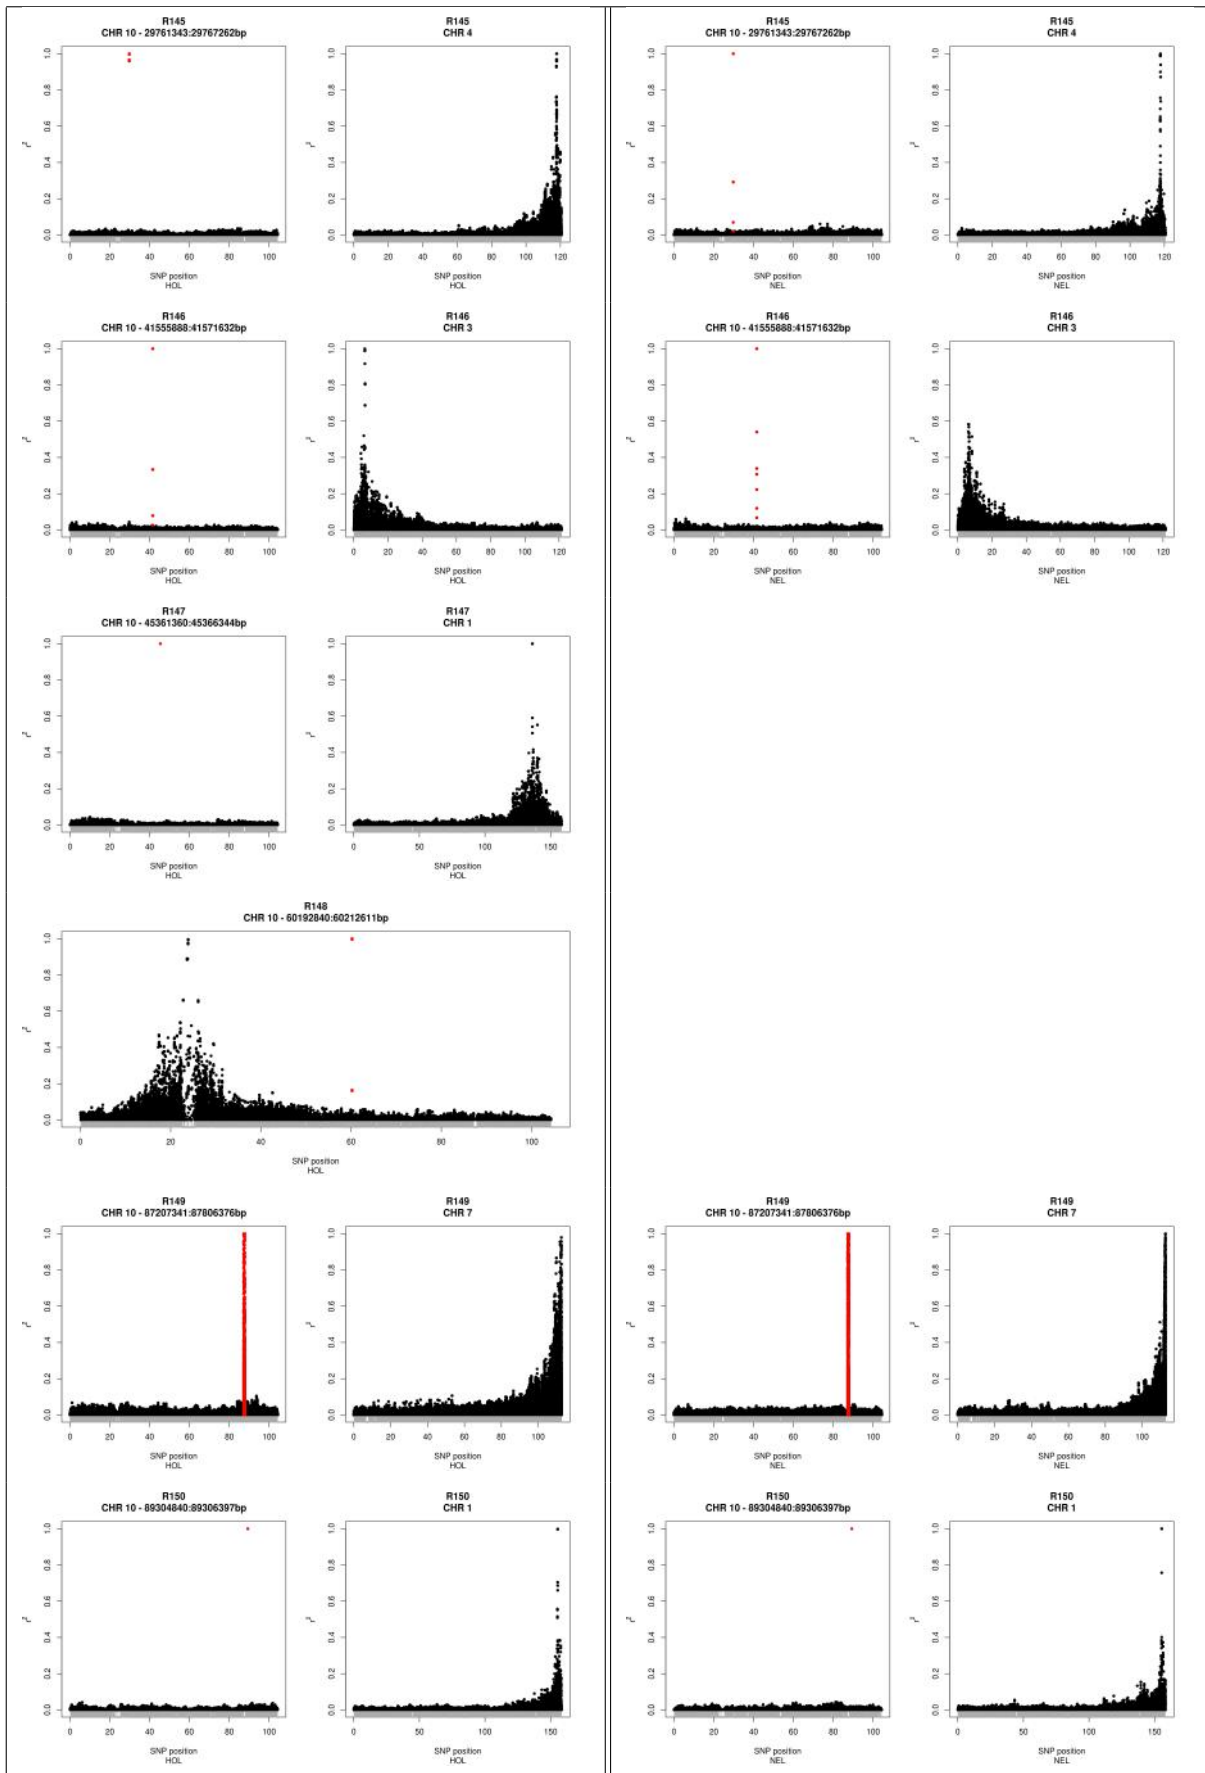

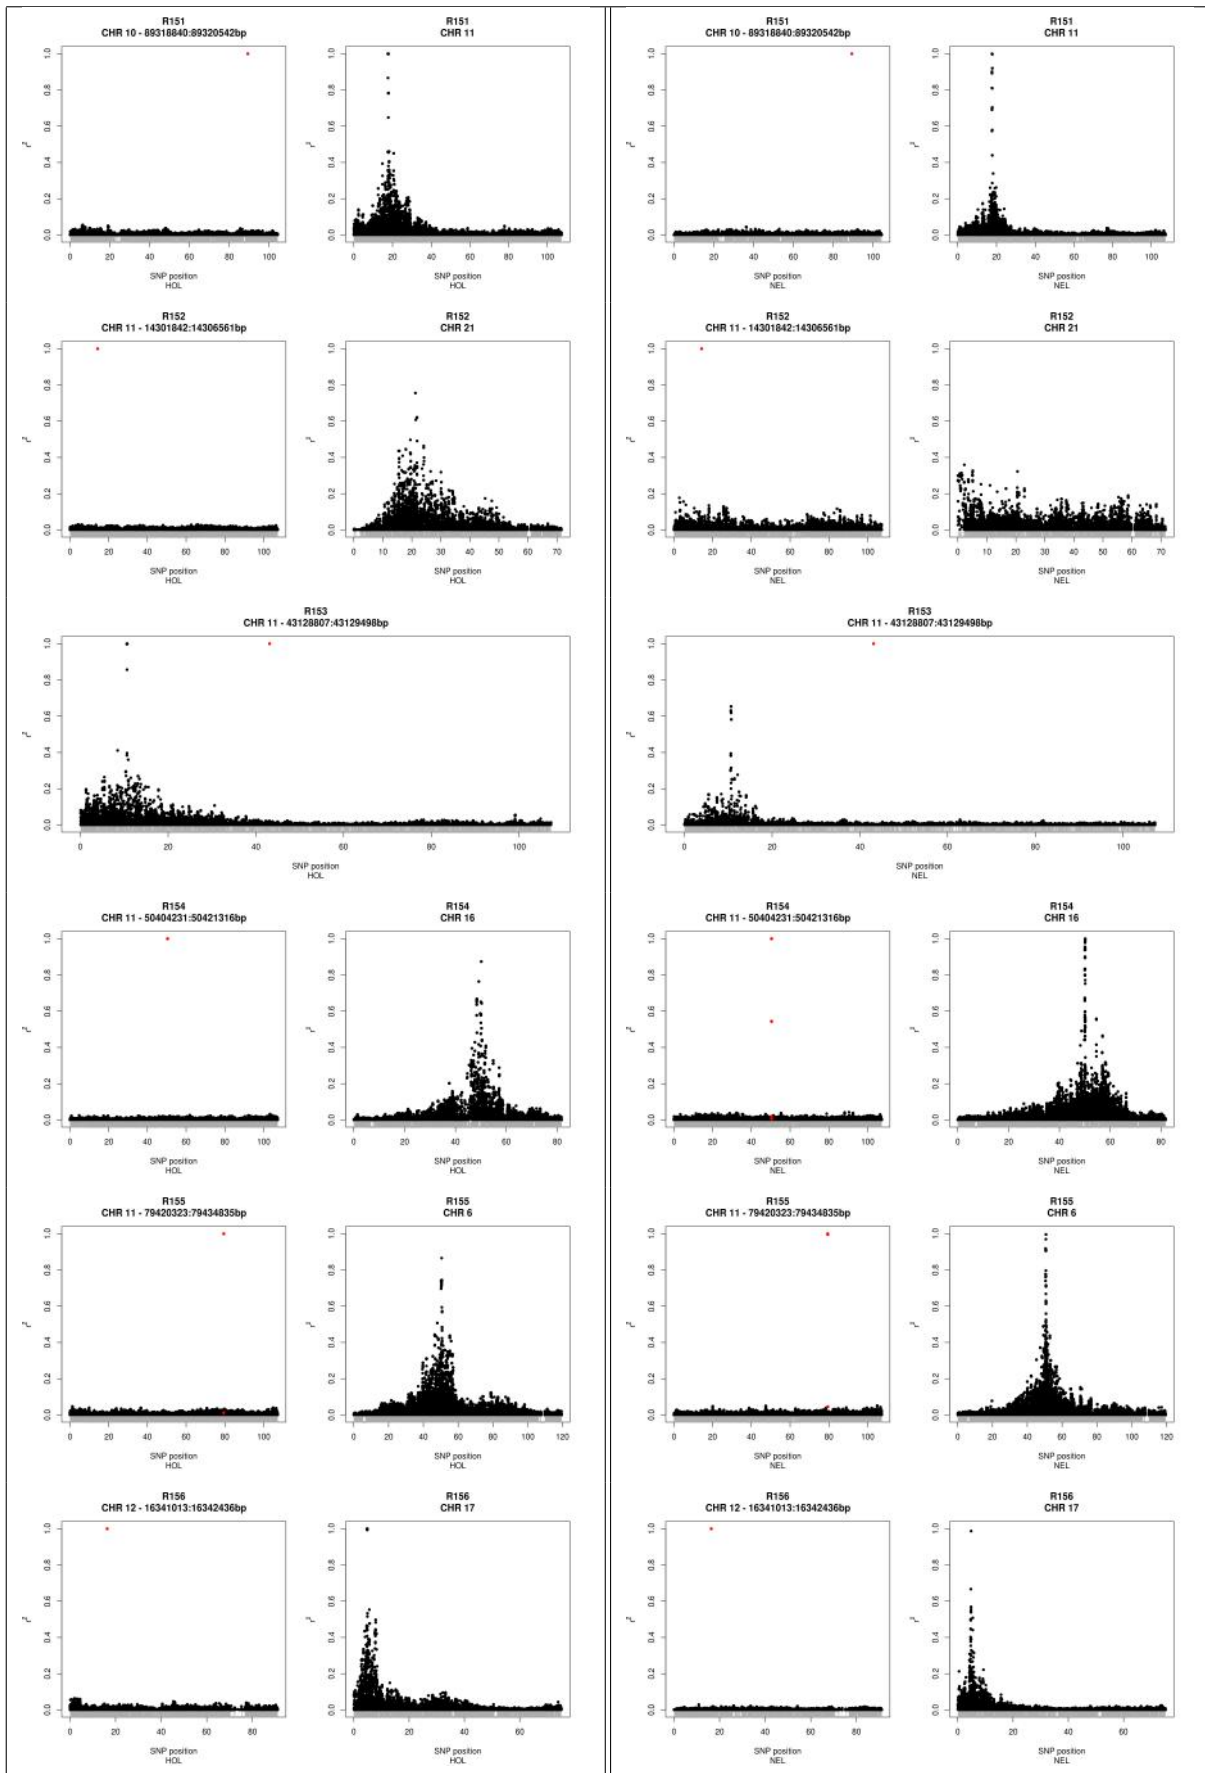

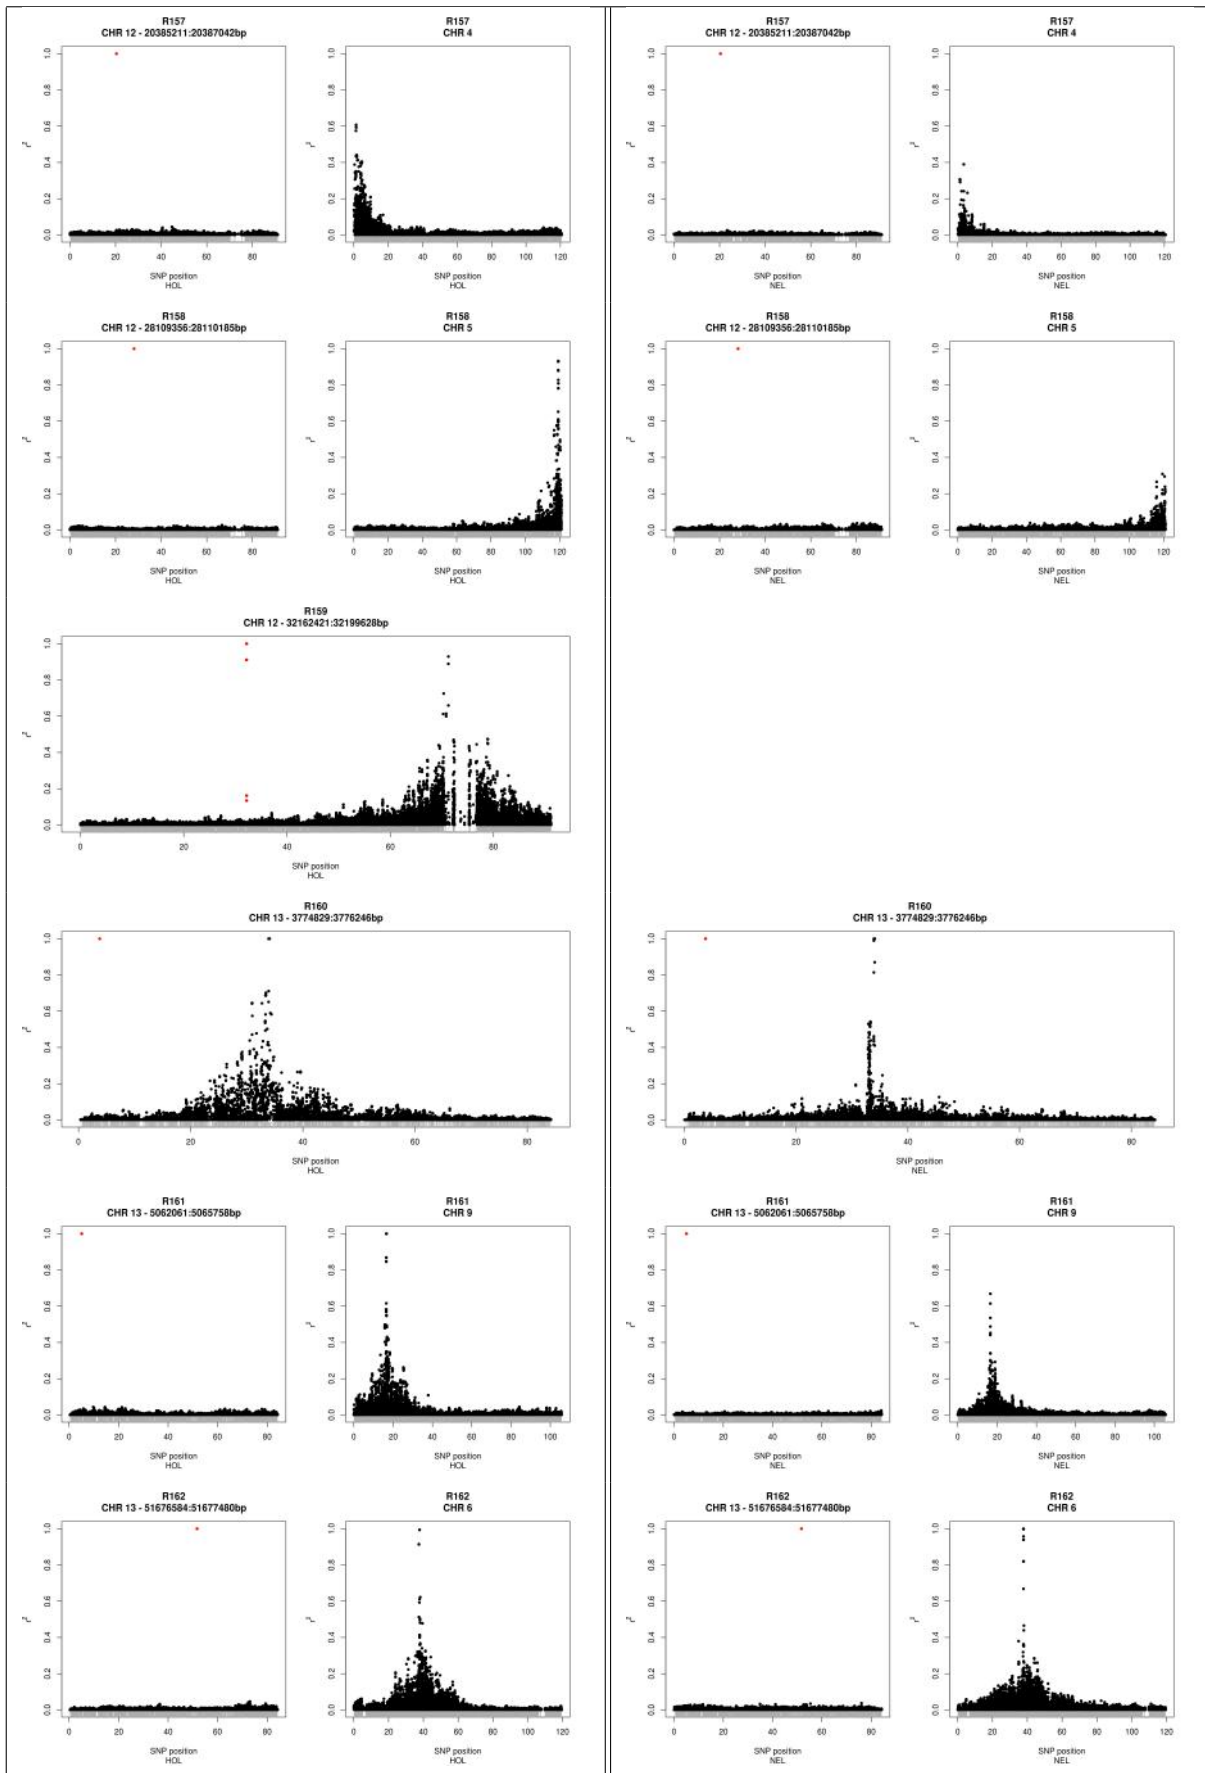

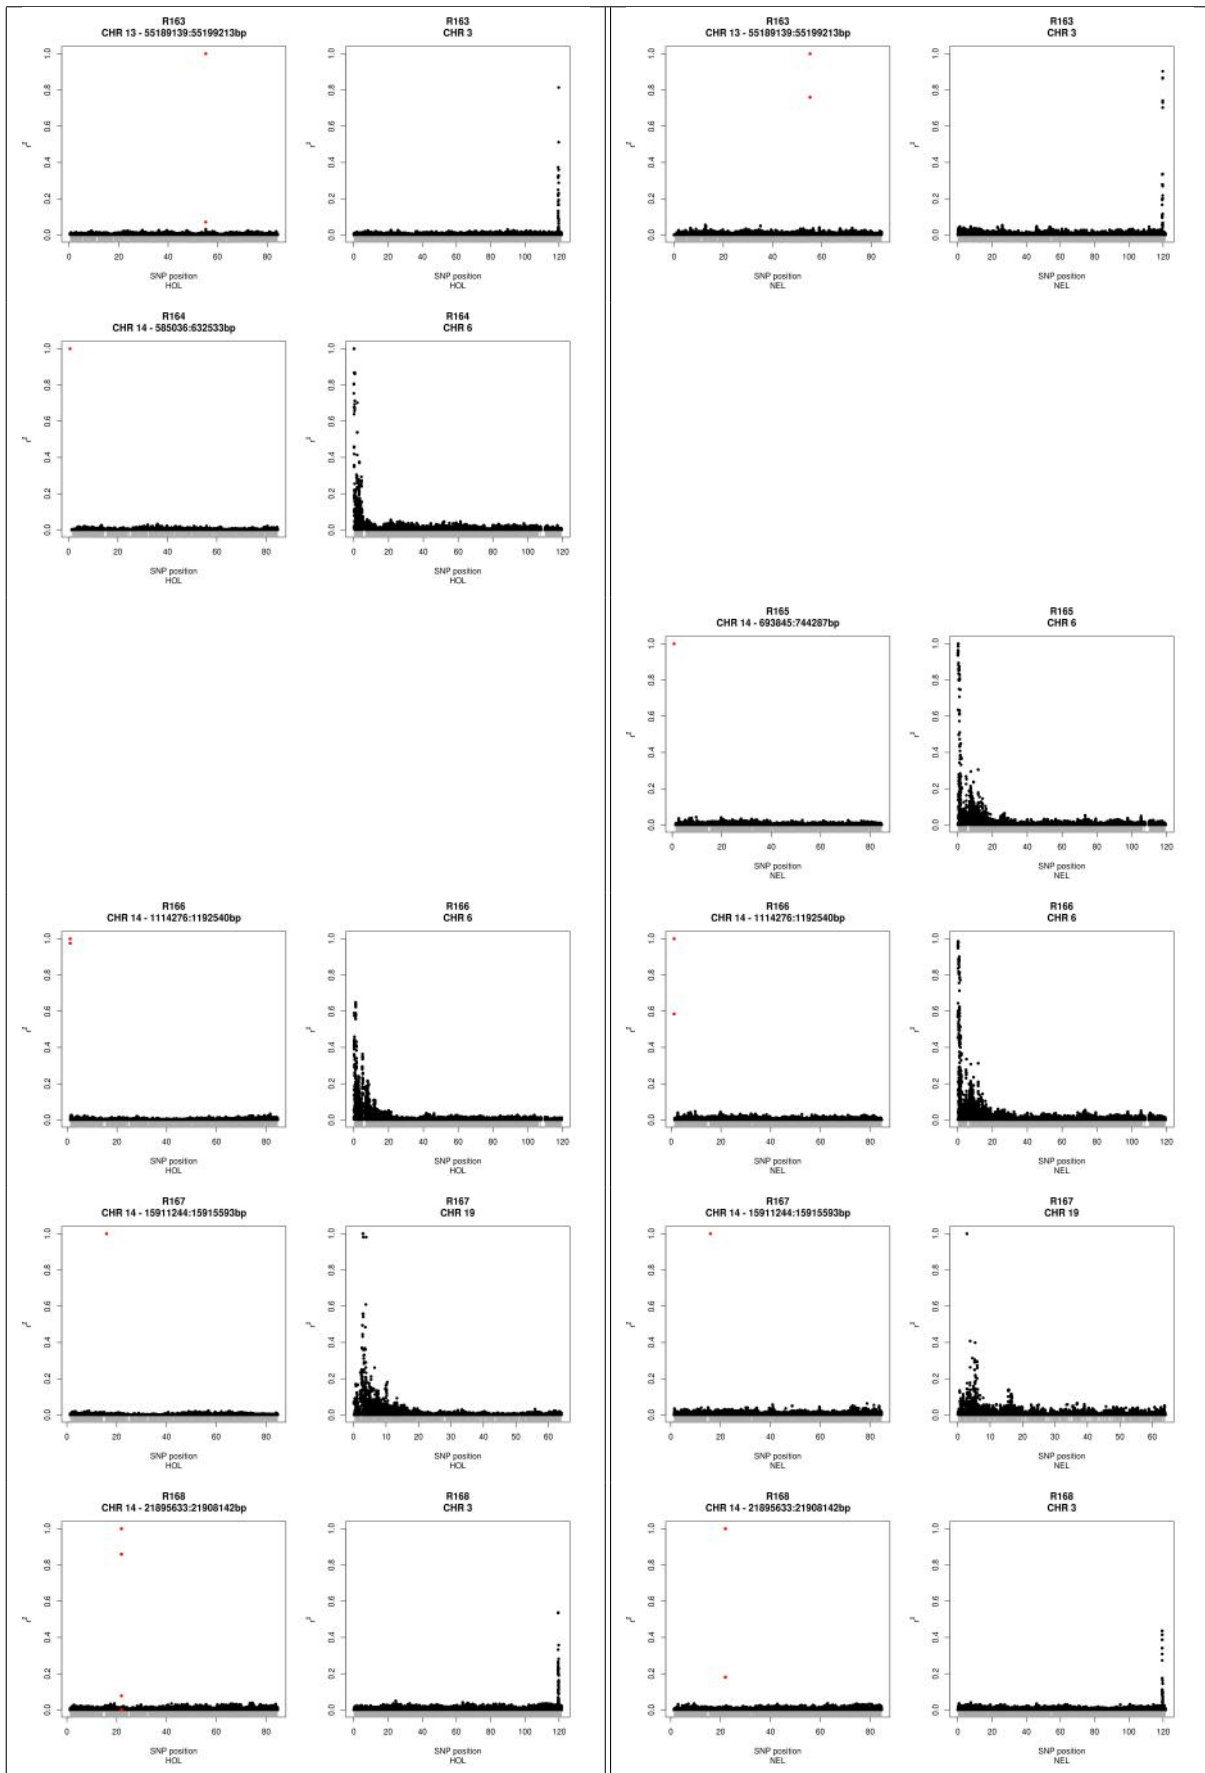

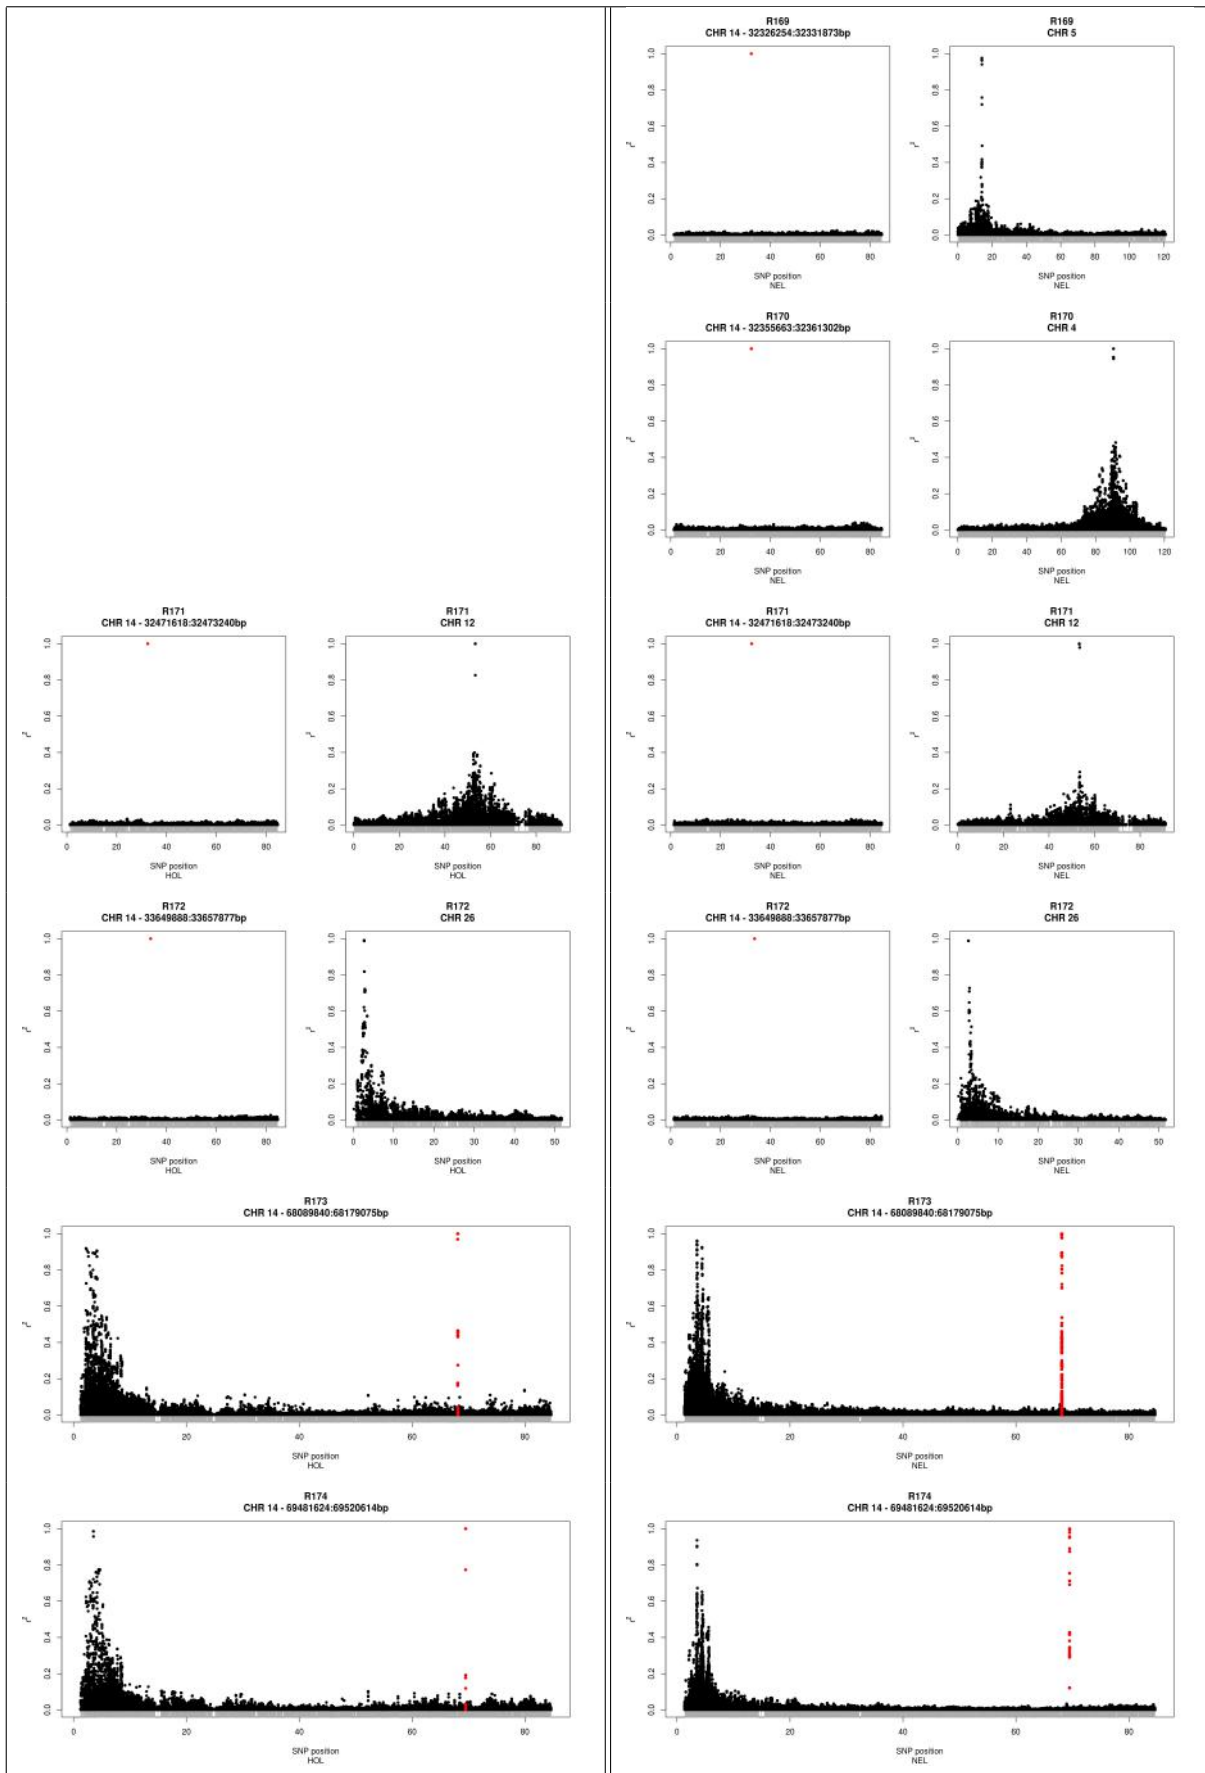

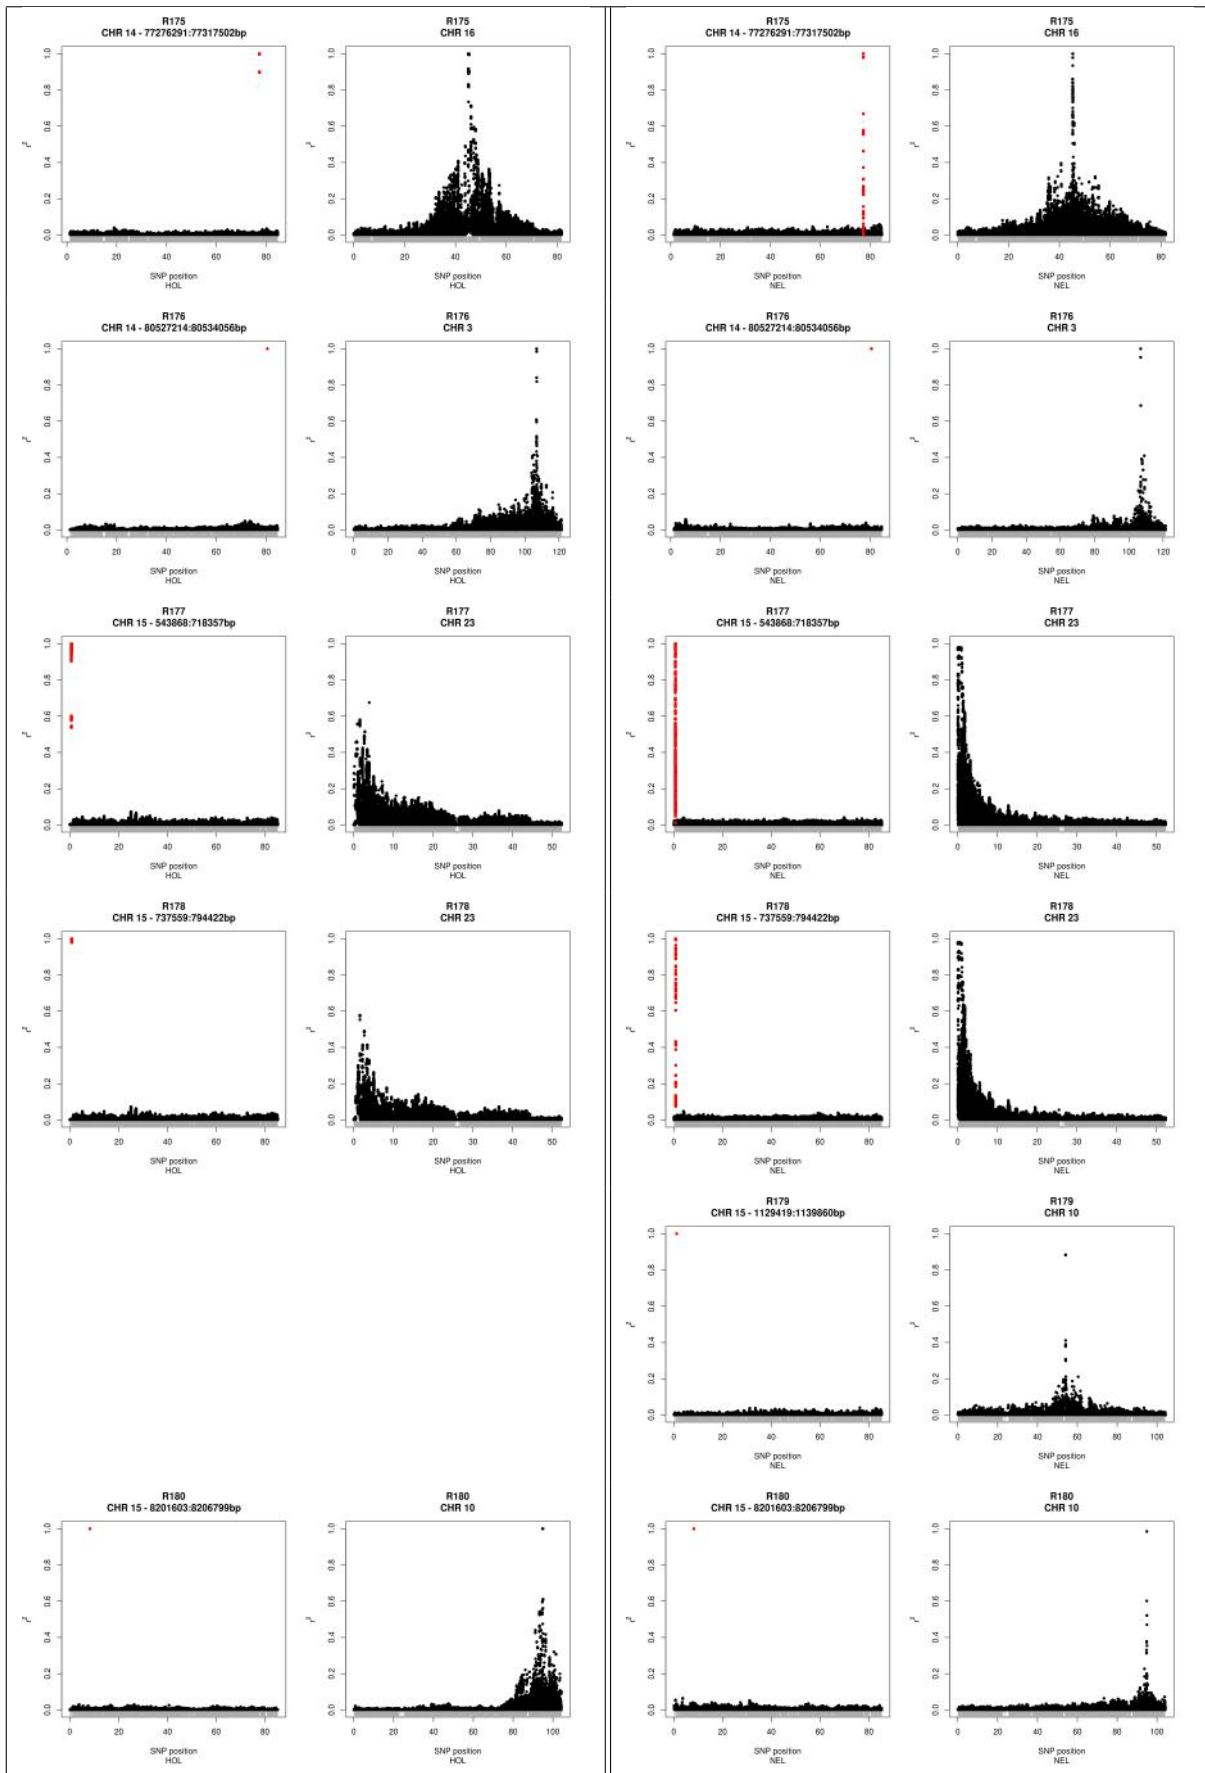

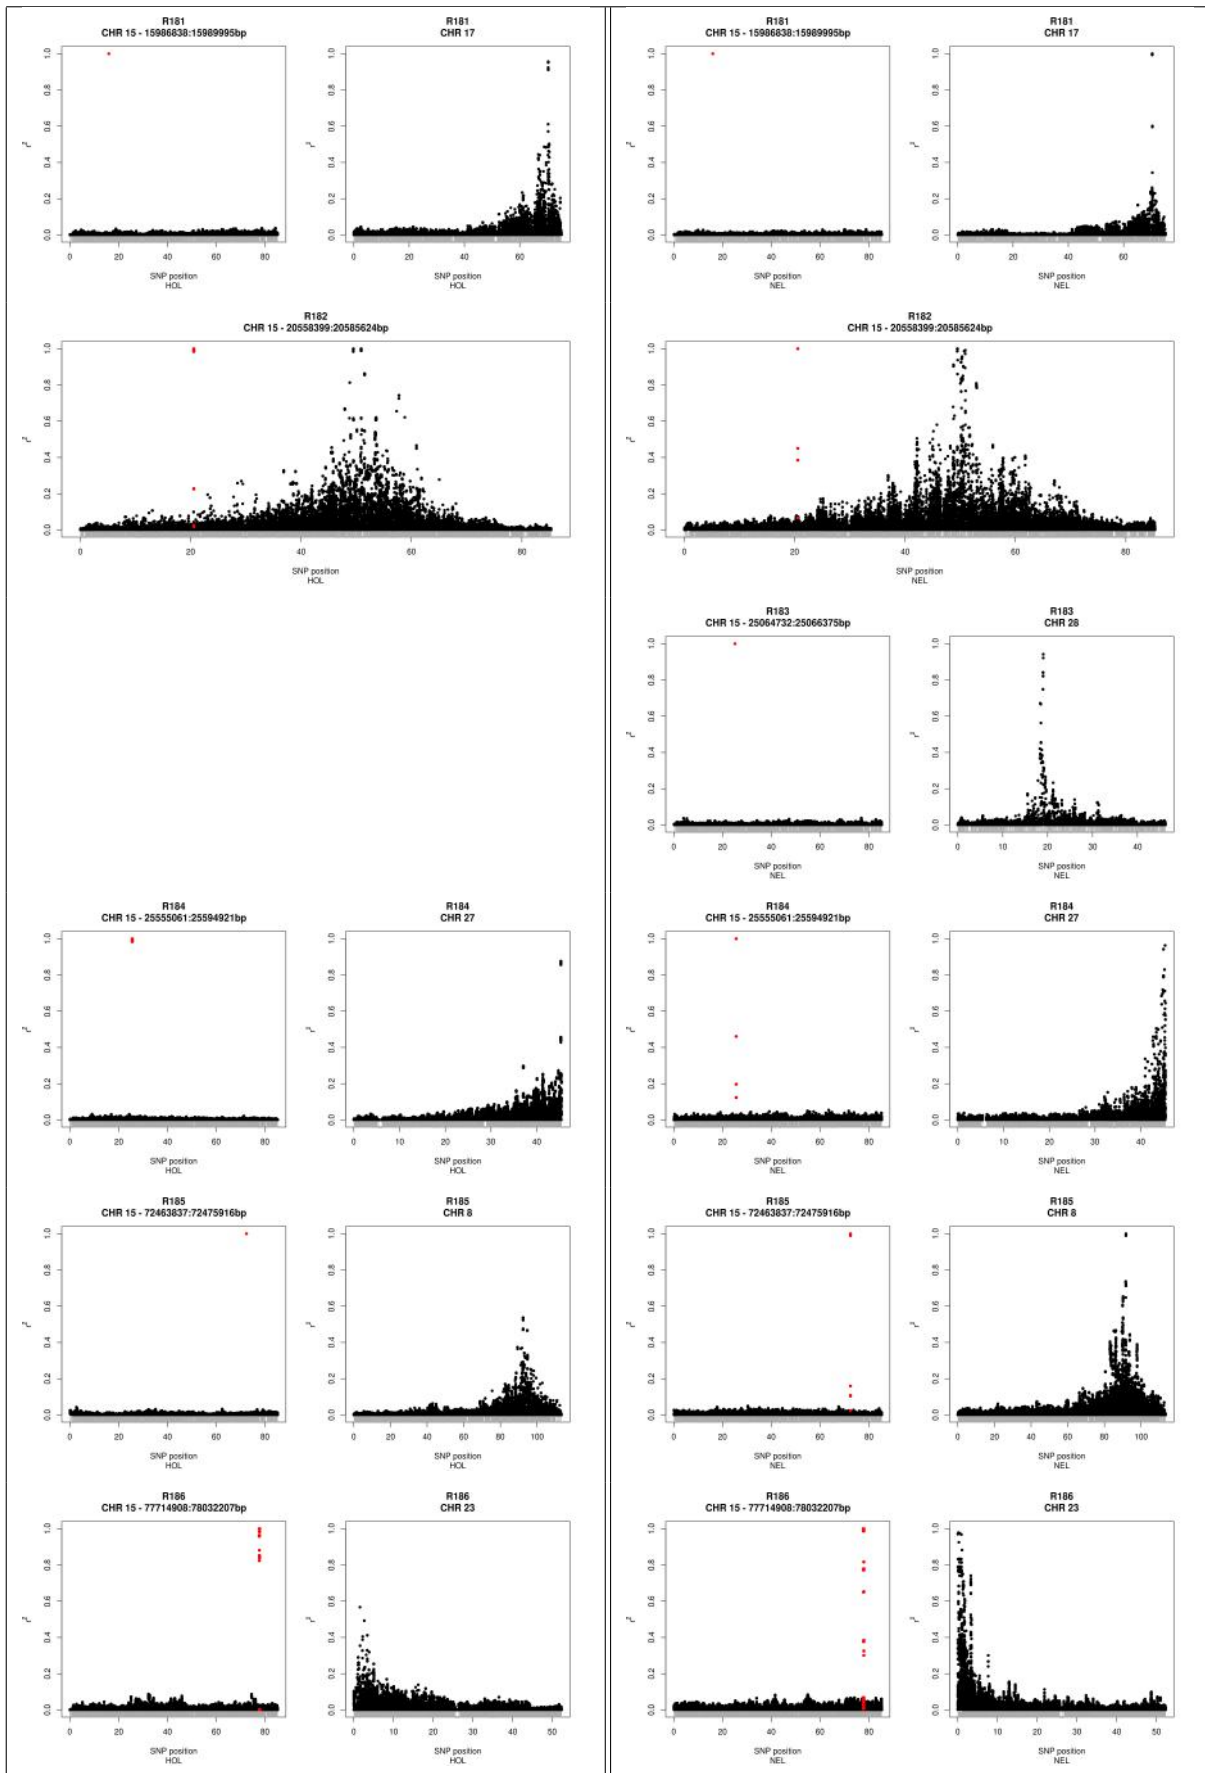

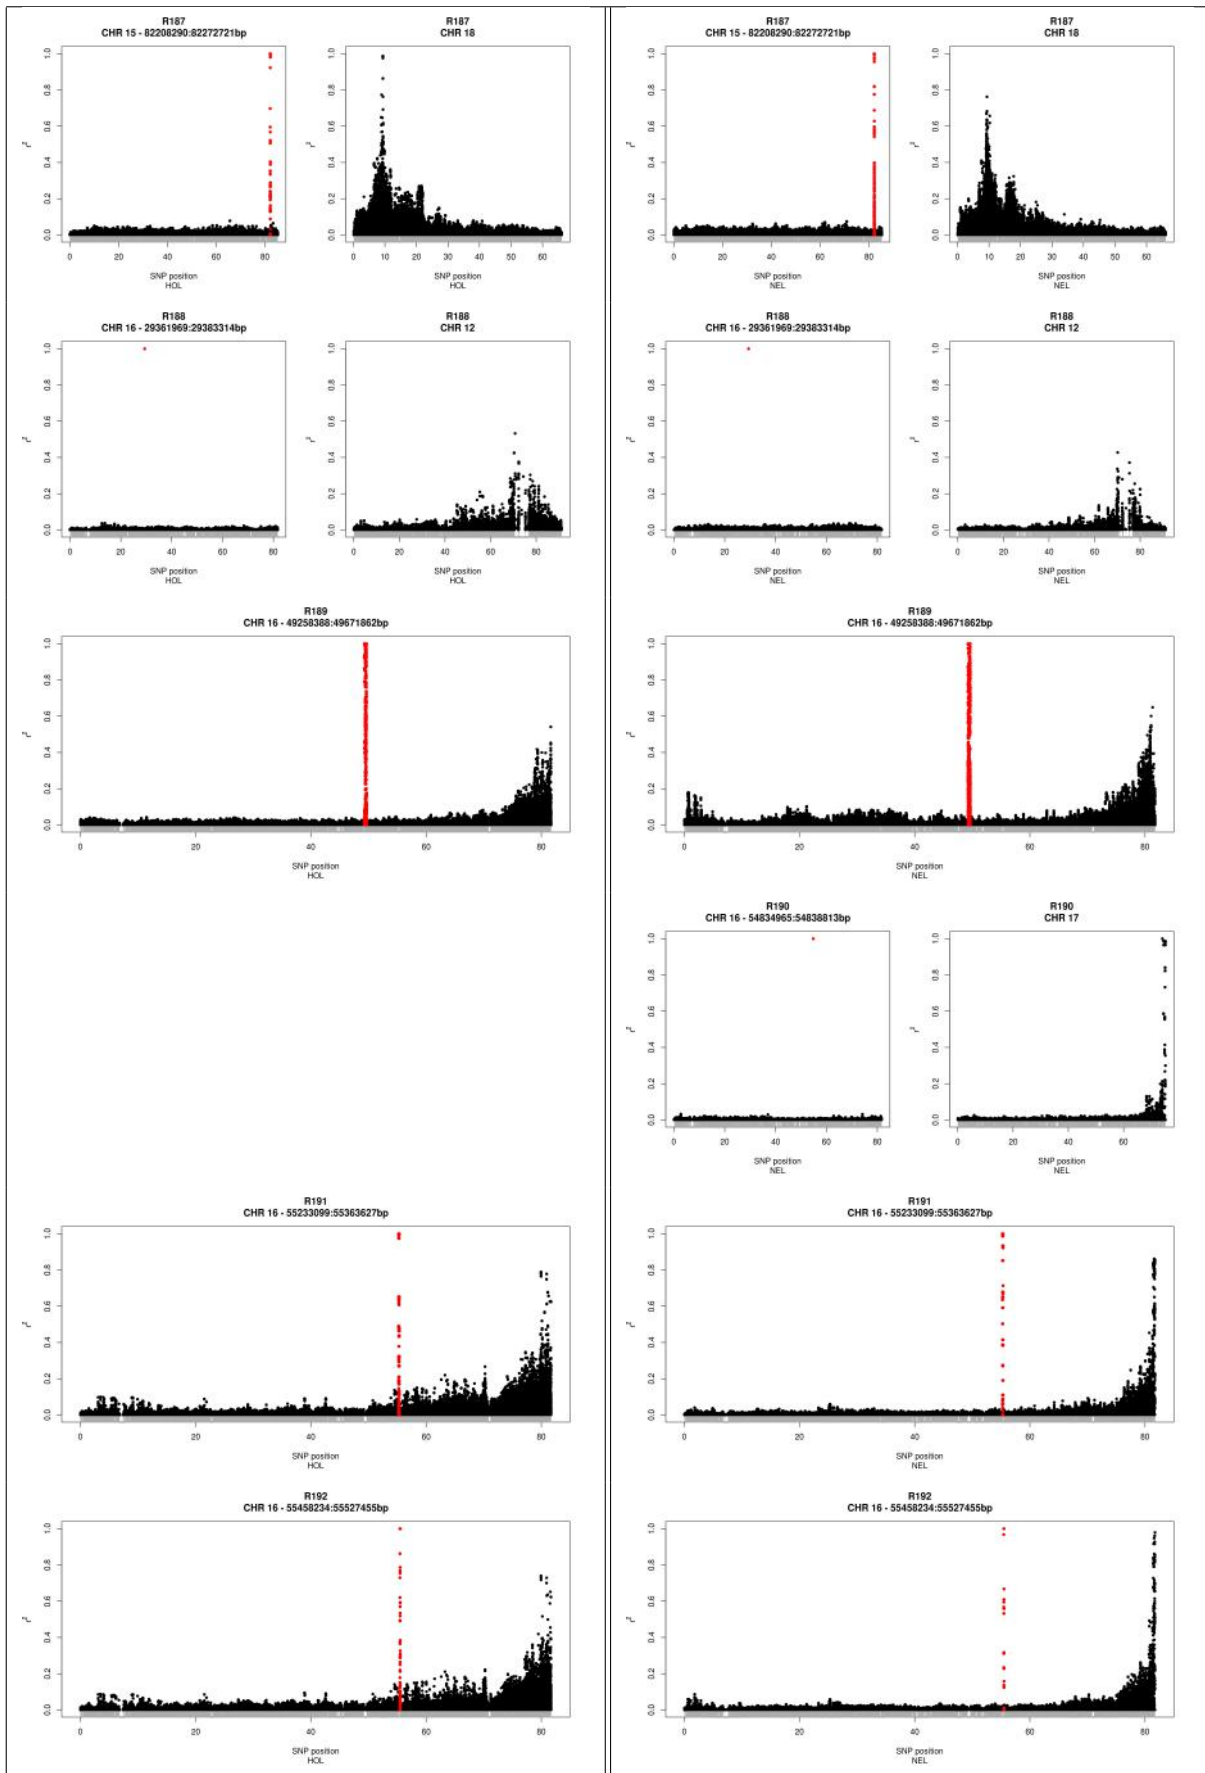



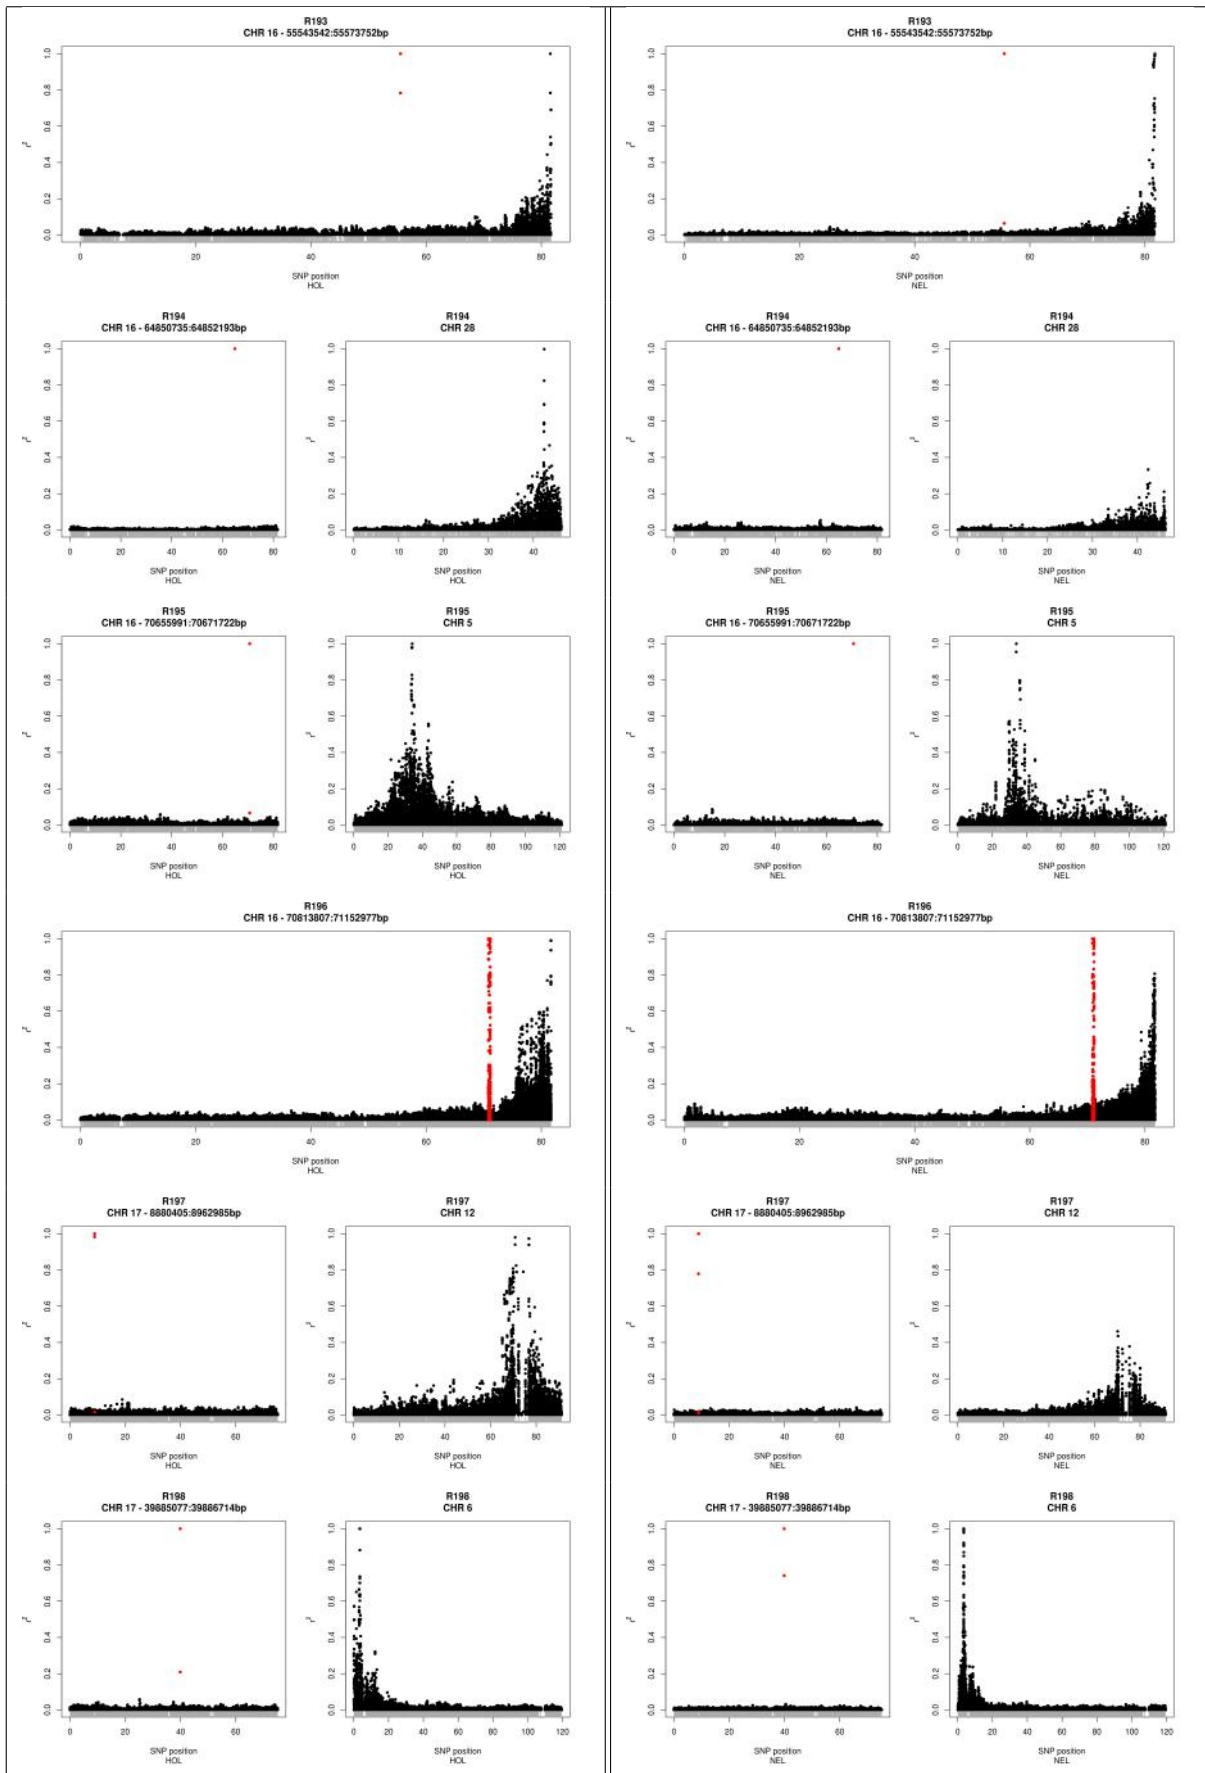

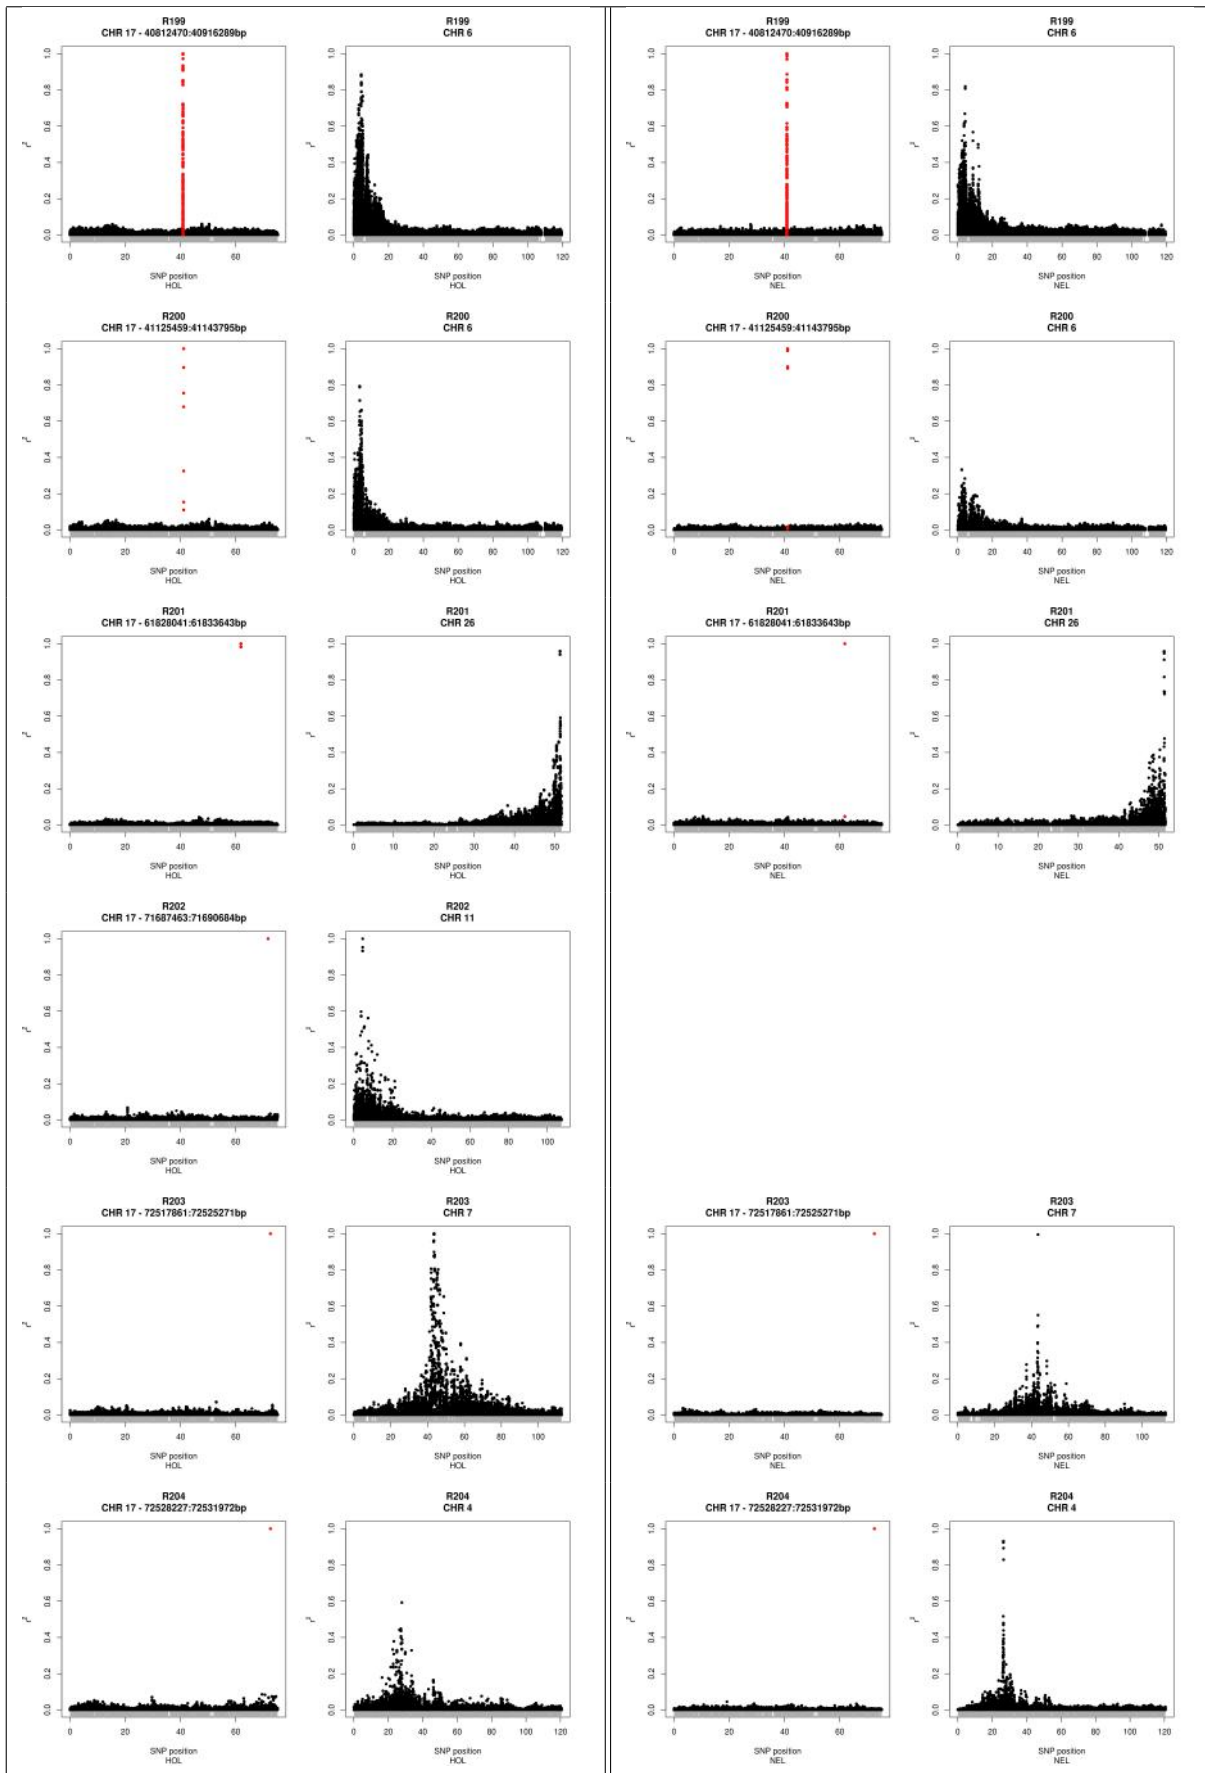

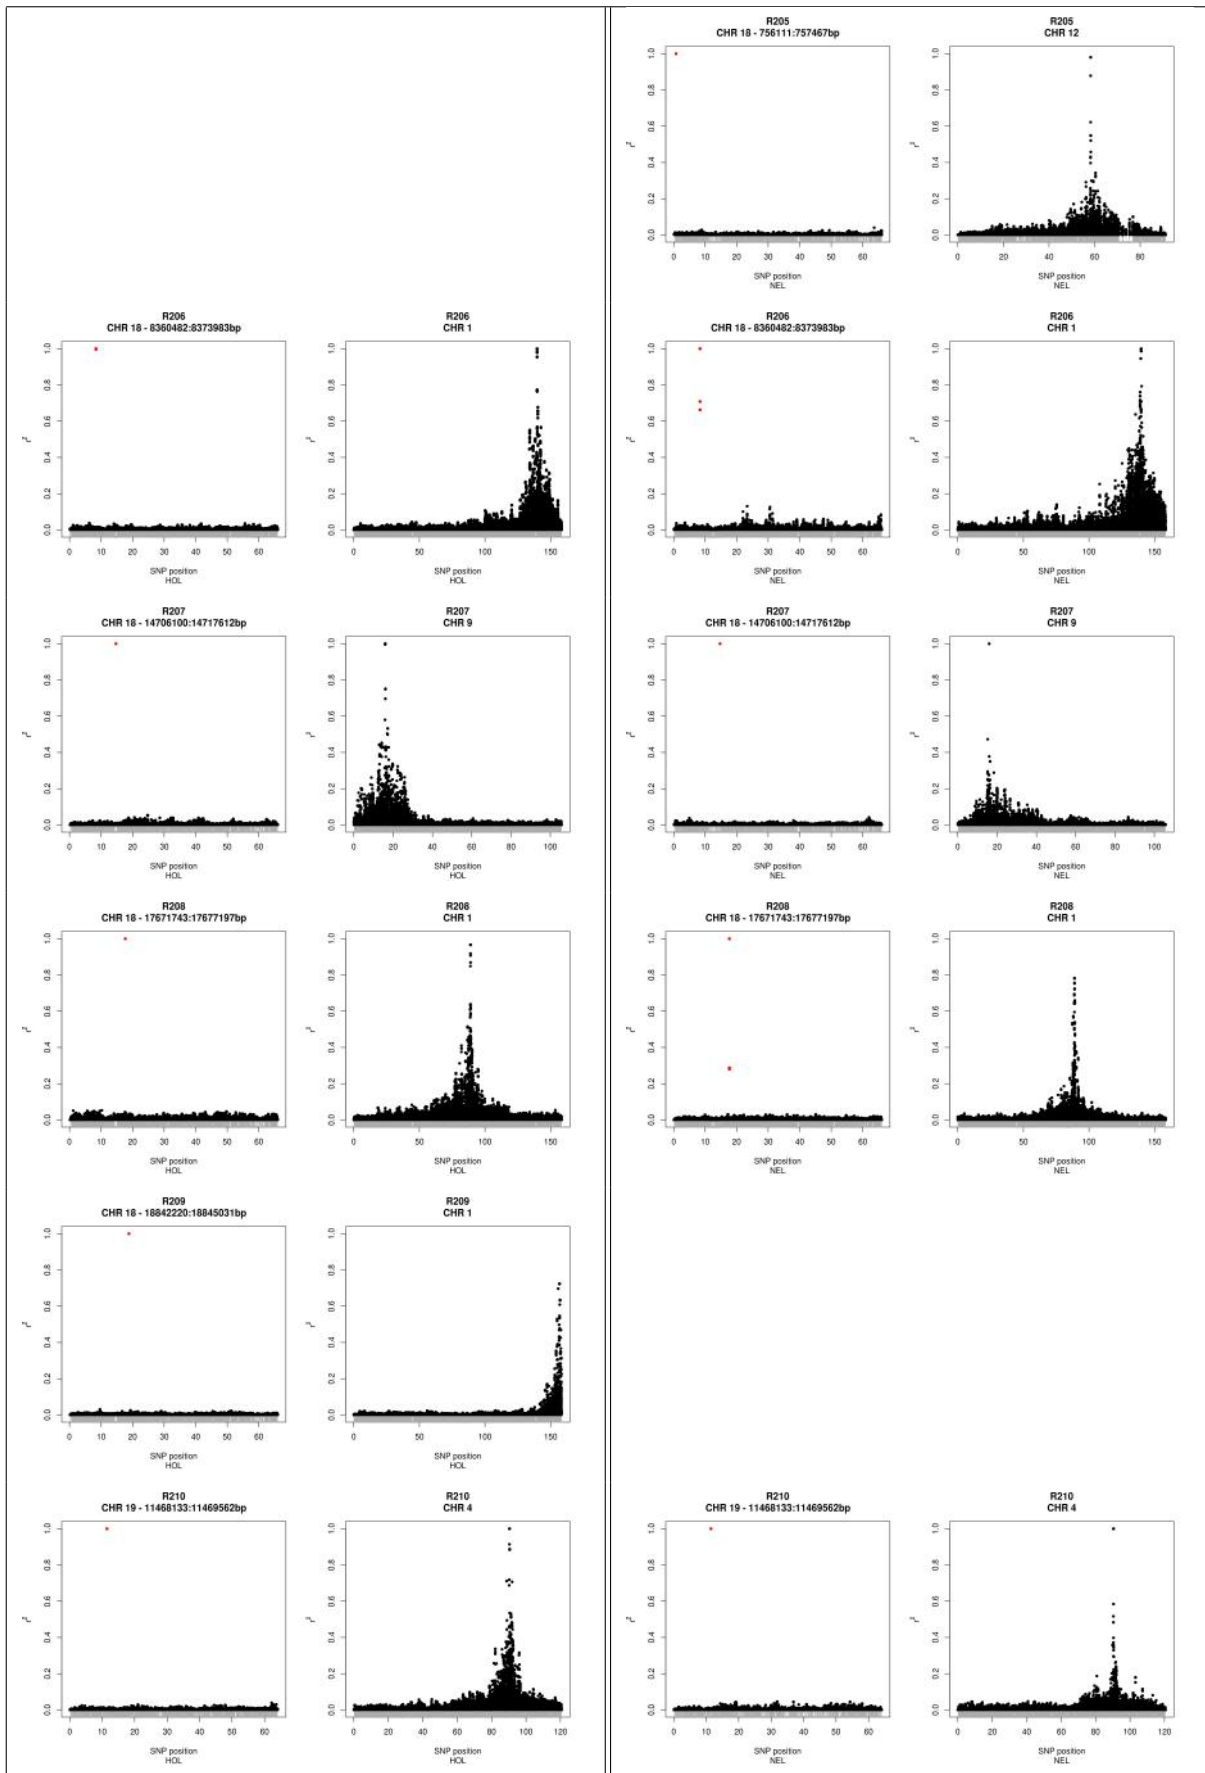

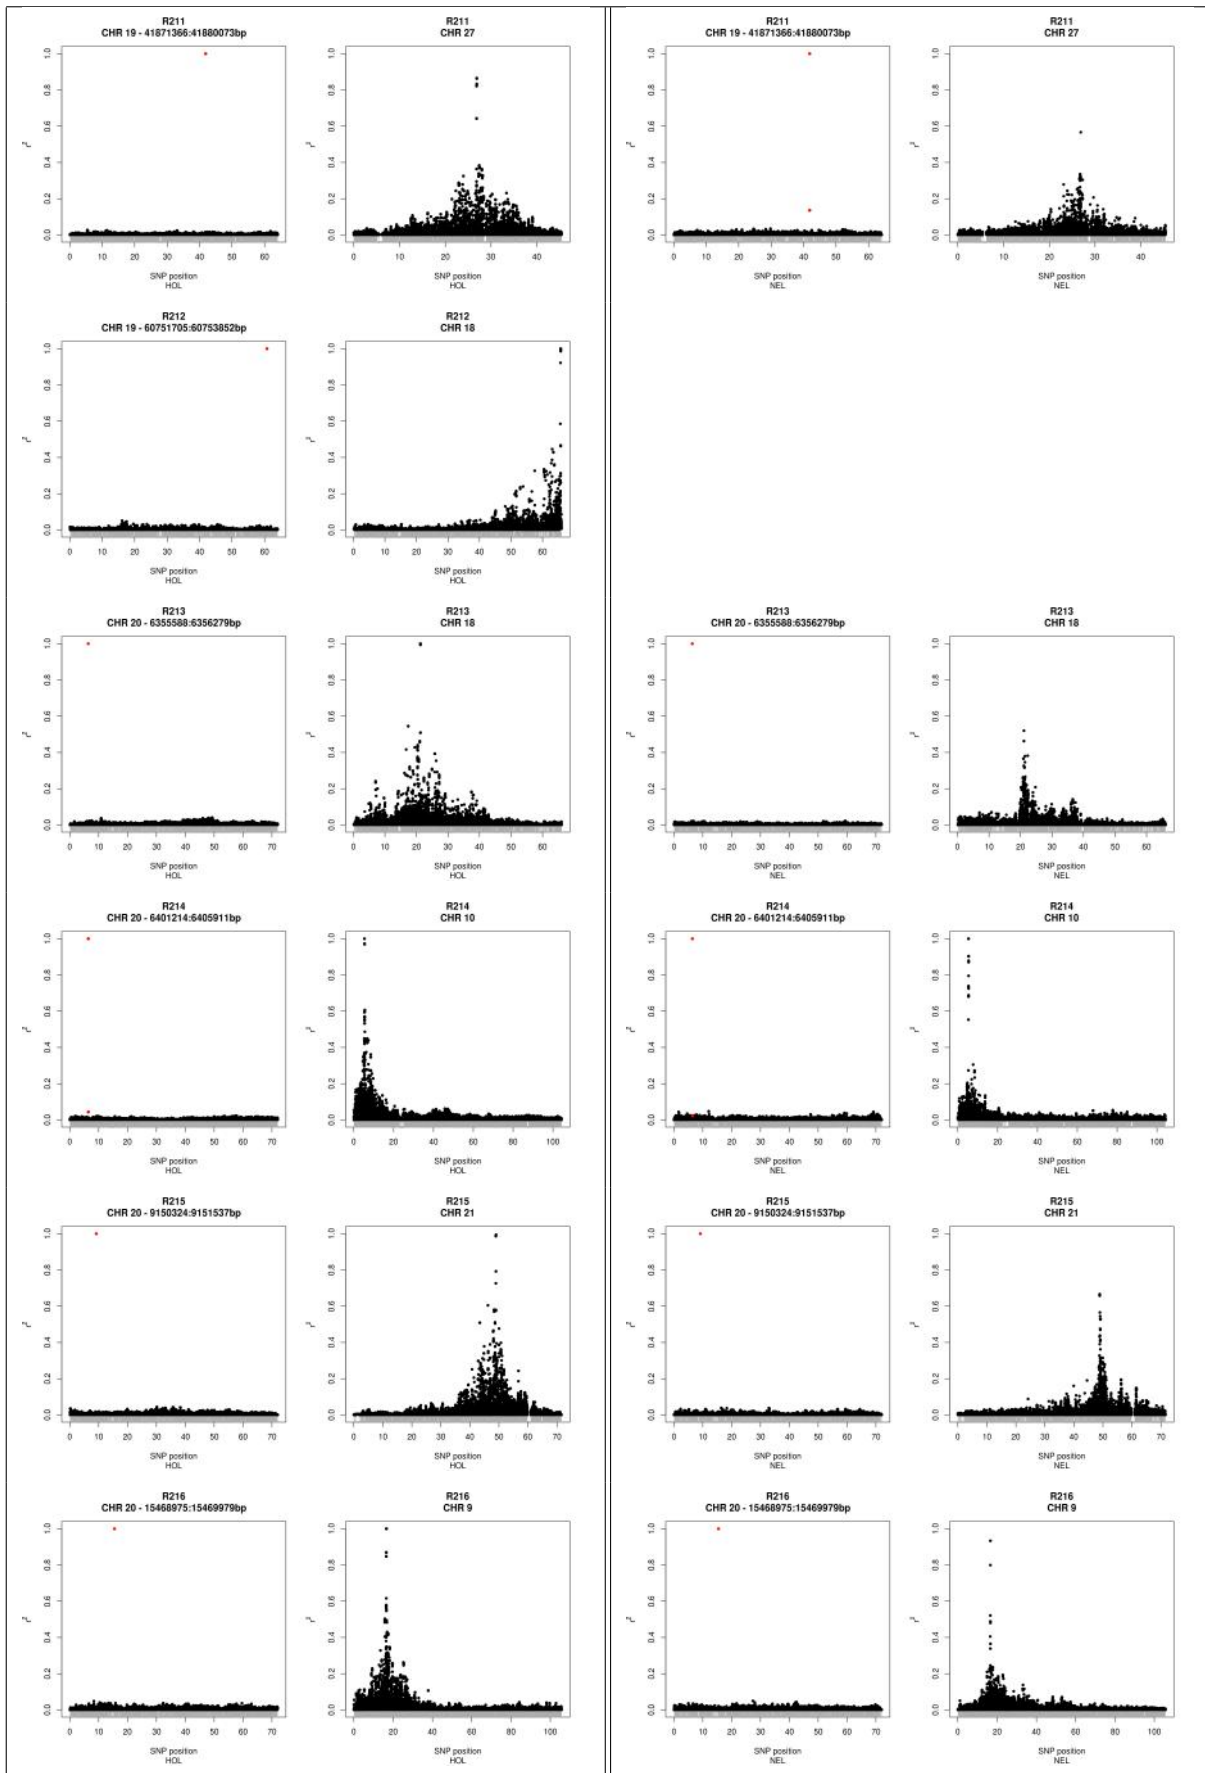

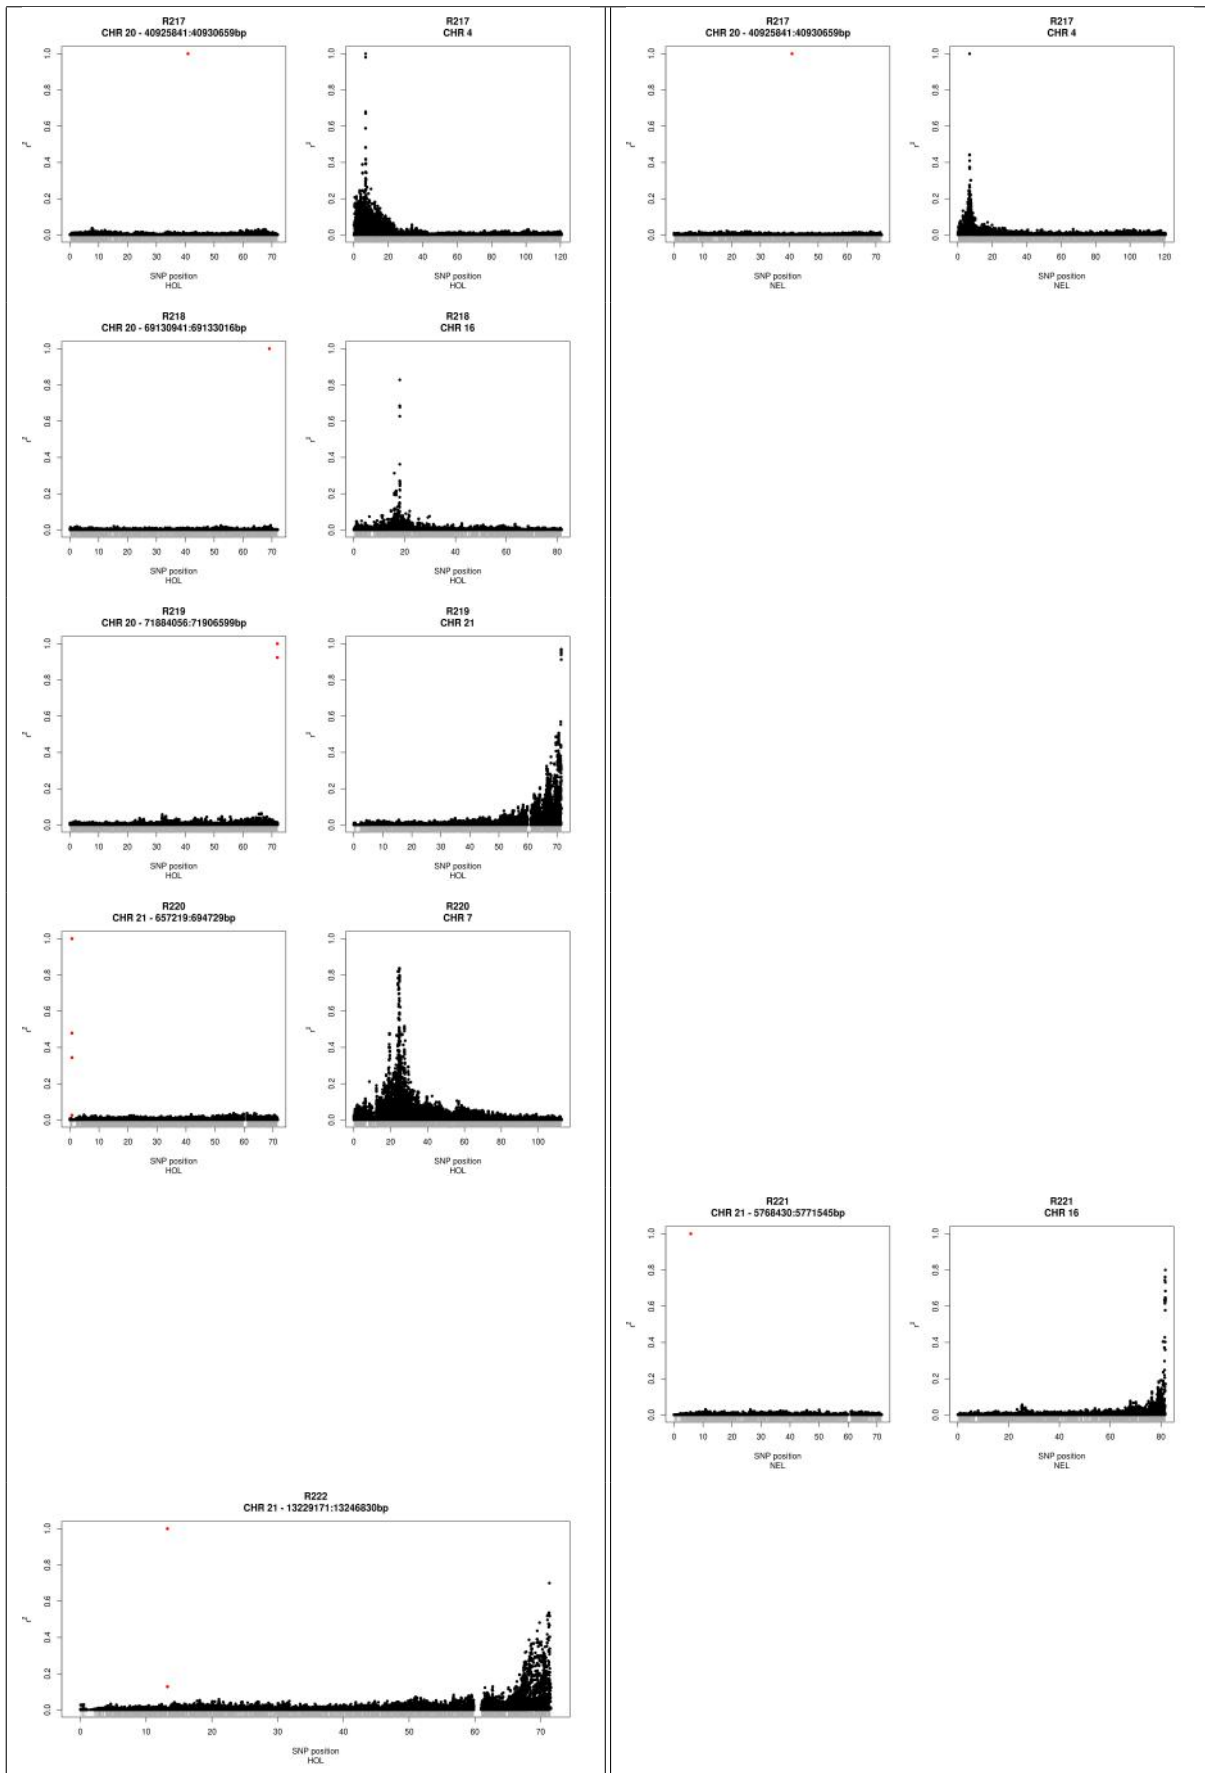

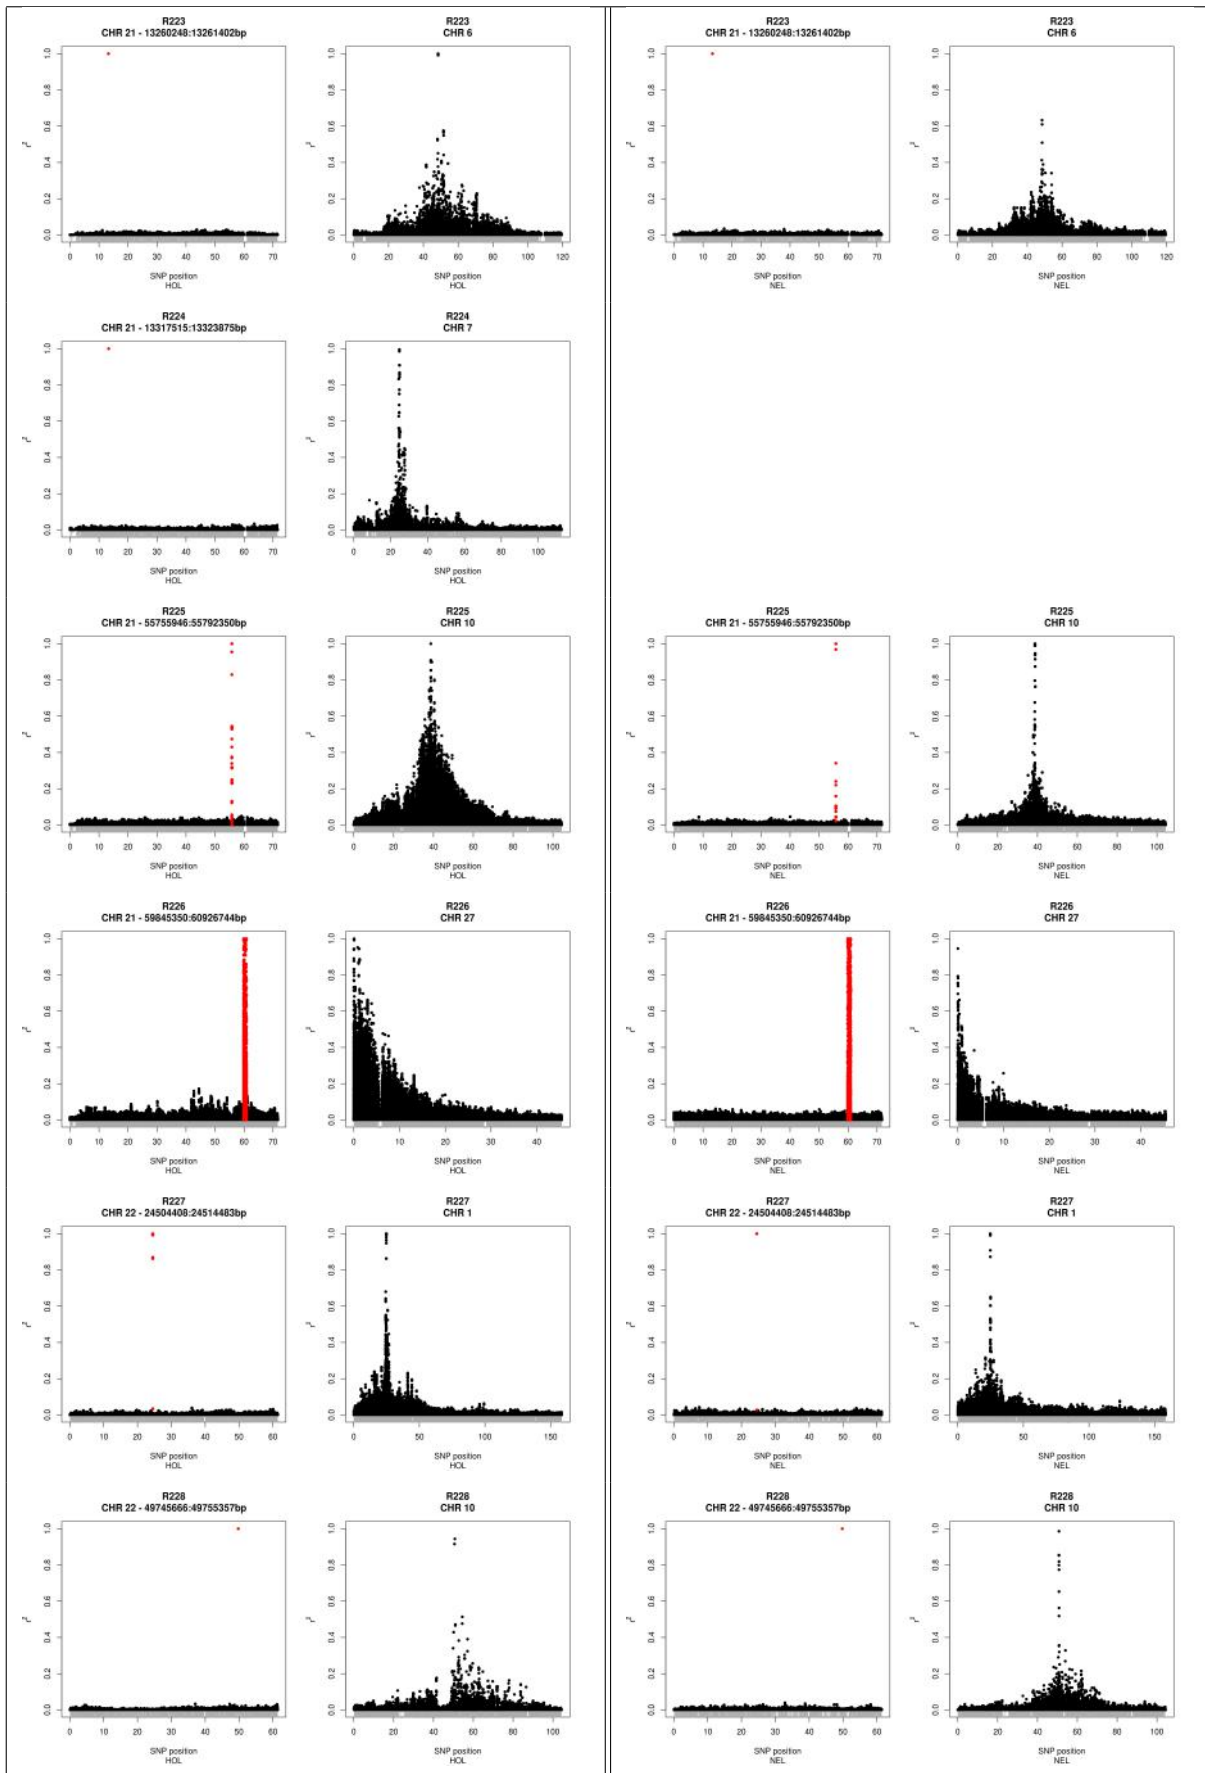

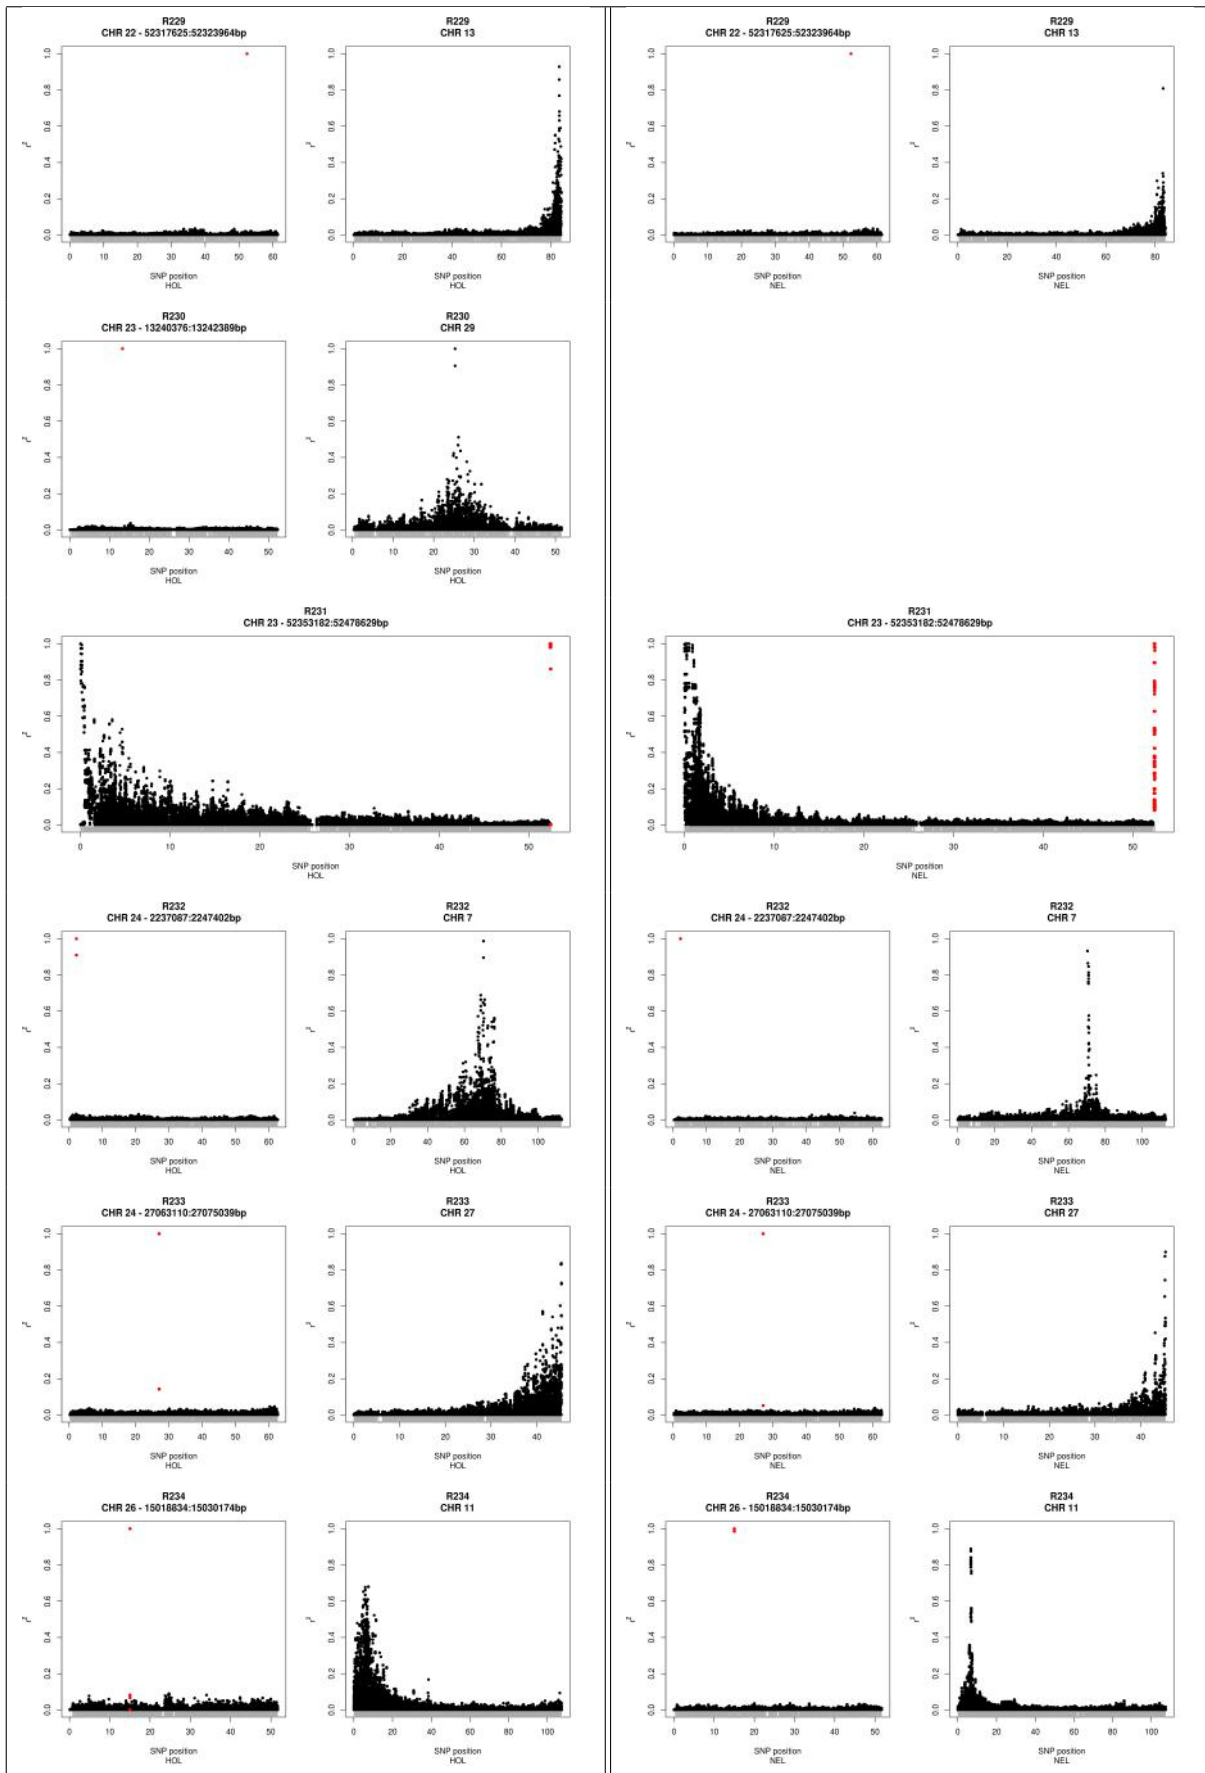

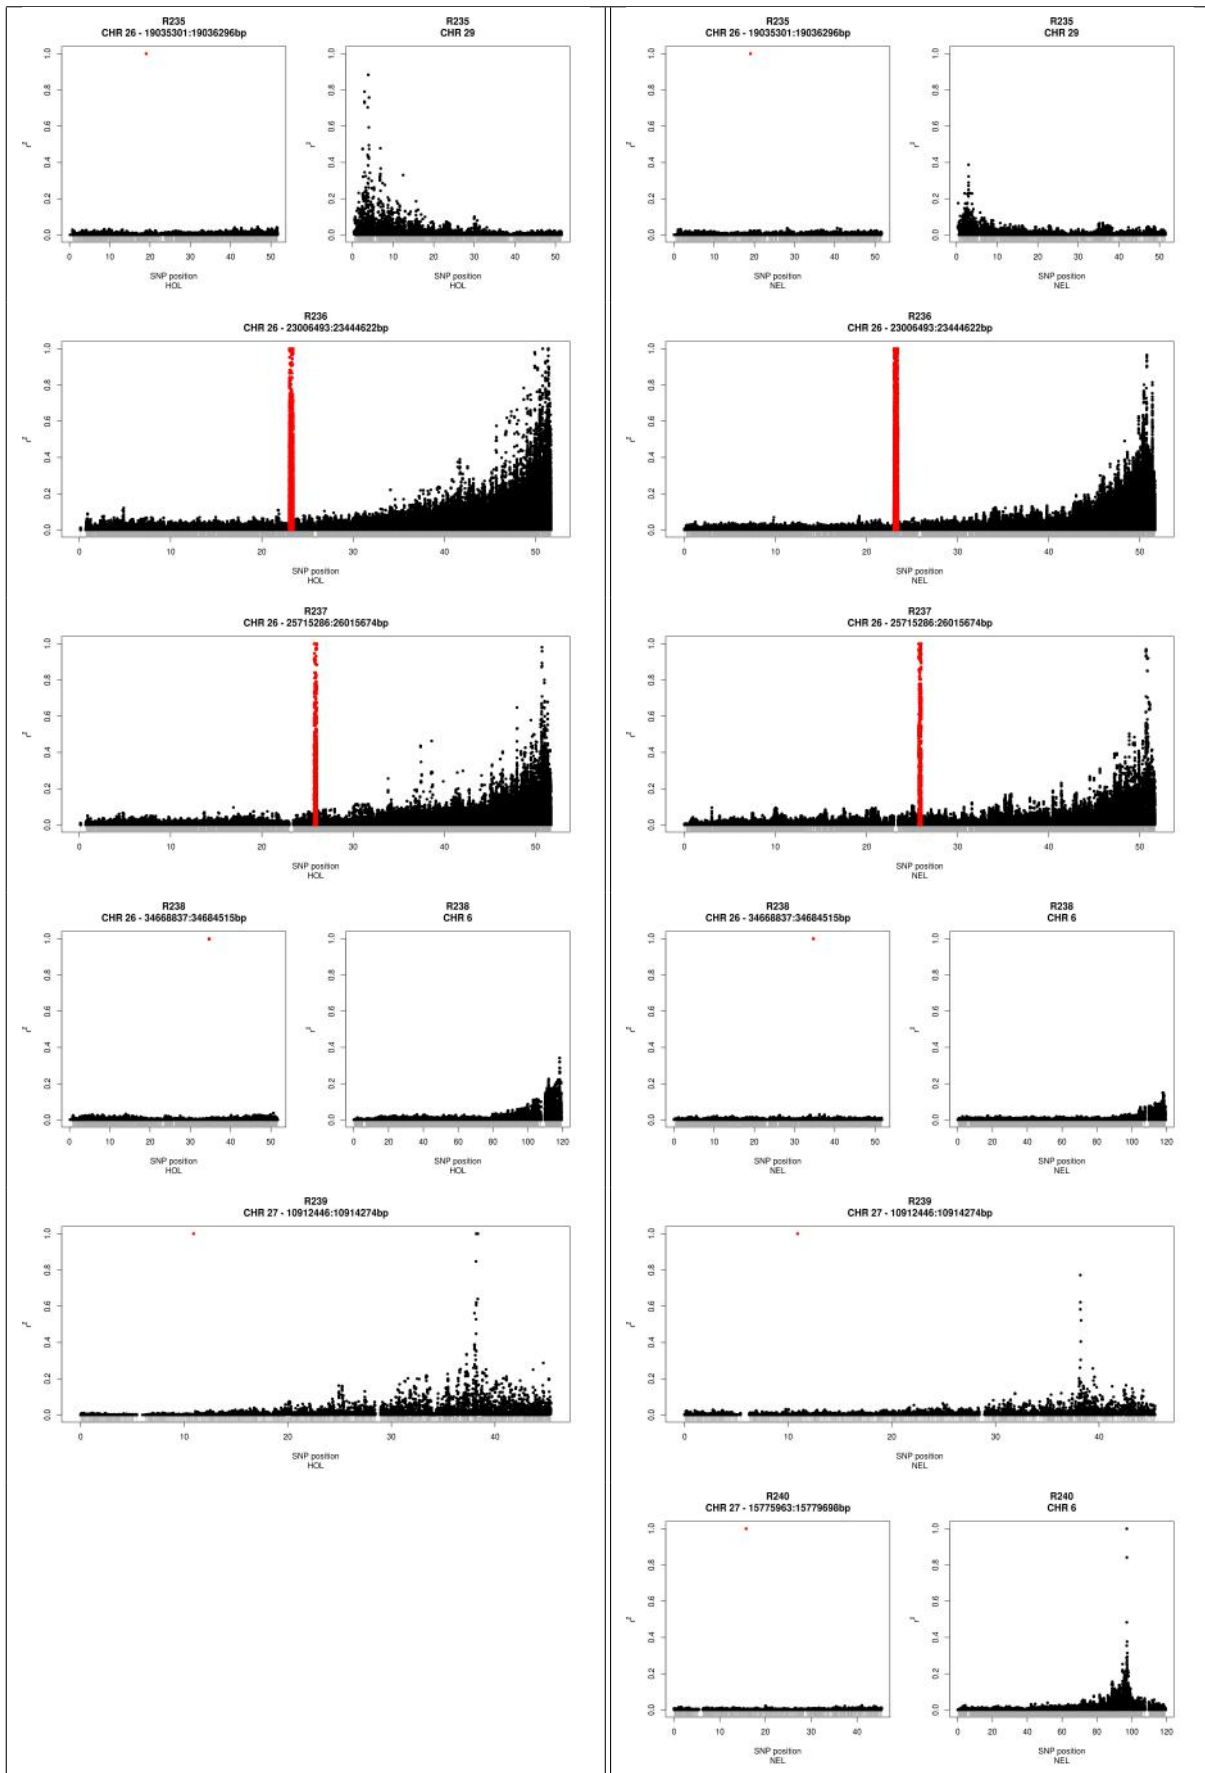



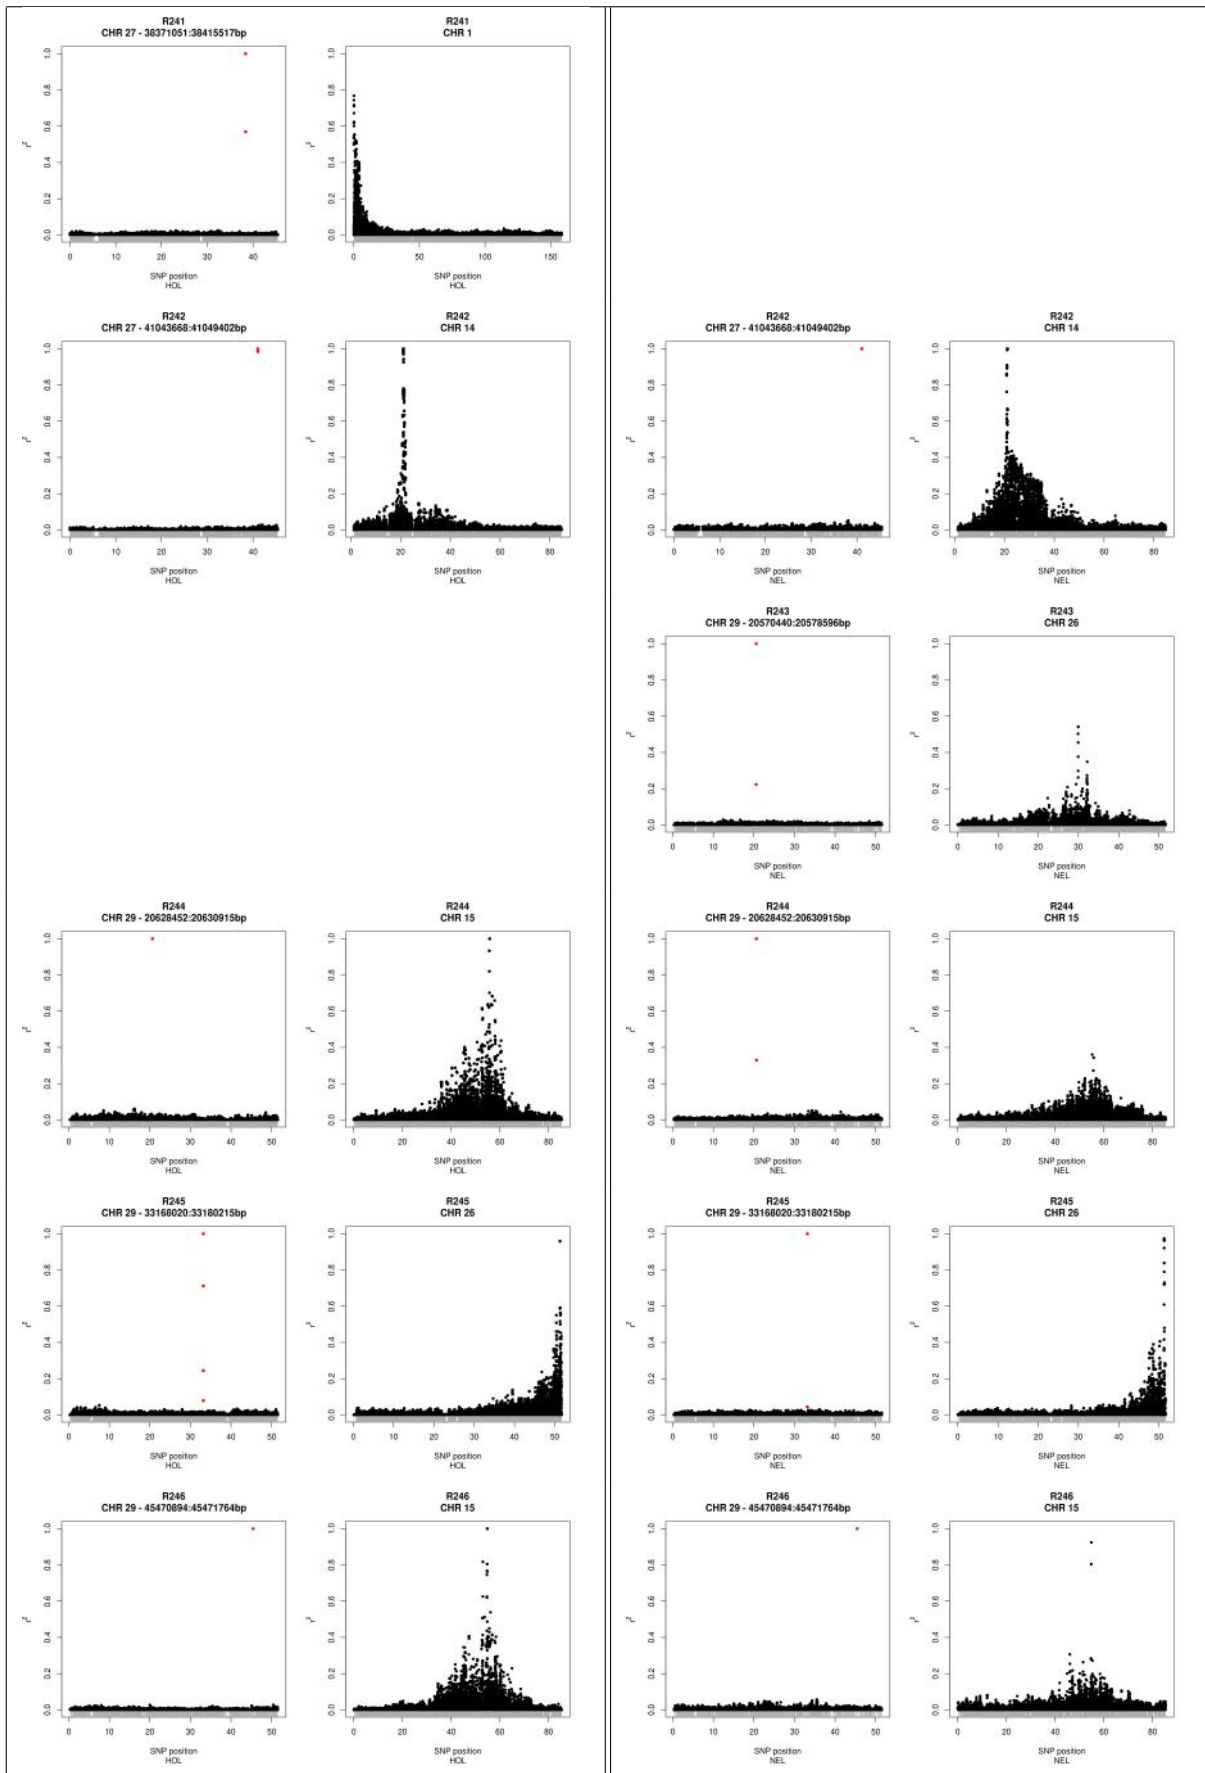

Supplement: 12864_2016_3049_MOESM6_ESM.pdf [file 12864_2016_3049_MOESM6_ESM.pdf]
