# Supplementary material for: Revealing misassembled segments in the bovine reference genome by high resolution linkage disequilibrium scan
Source: PubMed Central journal article supplement (PMC5011828; doi:10.1186/s12864-016-3049-8), 2016-09-05

**Figure S6 Partially Misassembled Contig (PMisCon).** Left and right columns represent misplacements (red dots) found in Holstein and Nellore, respectively.

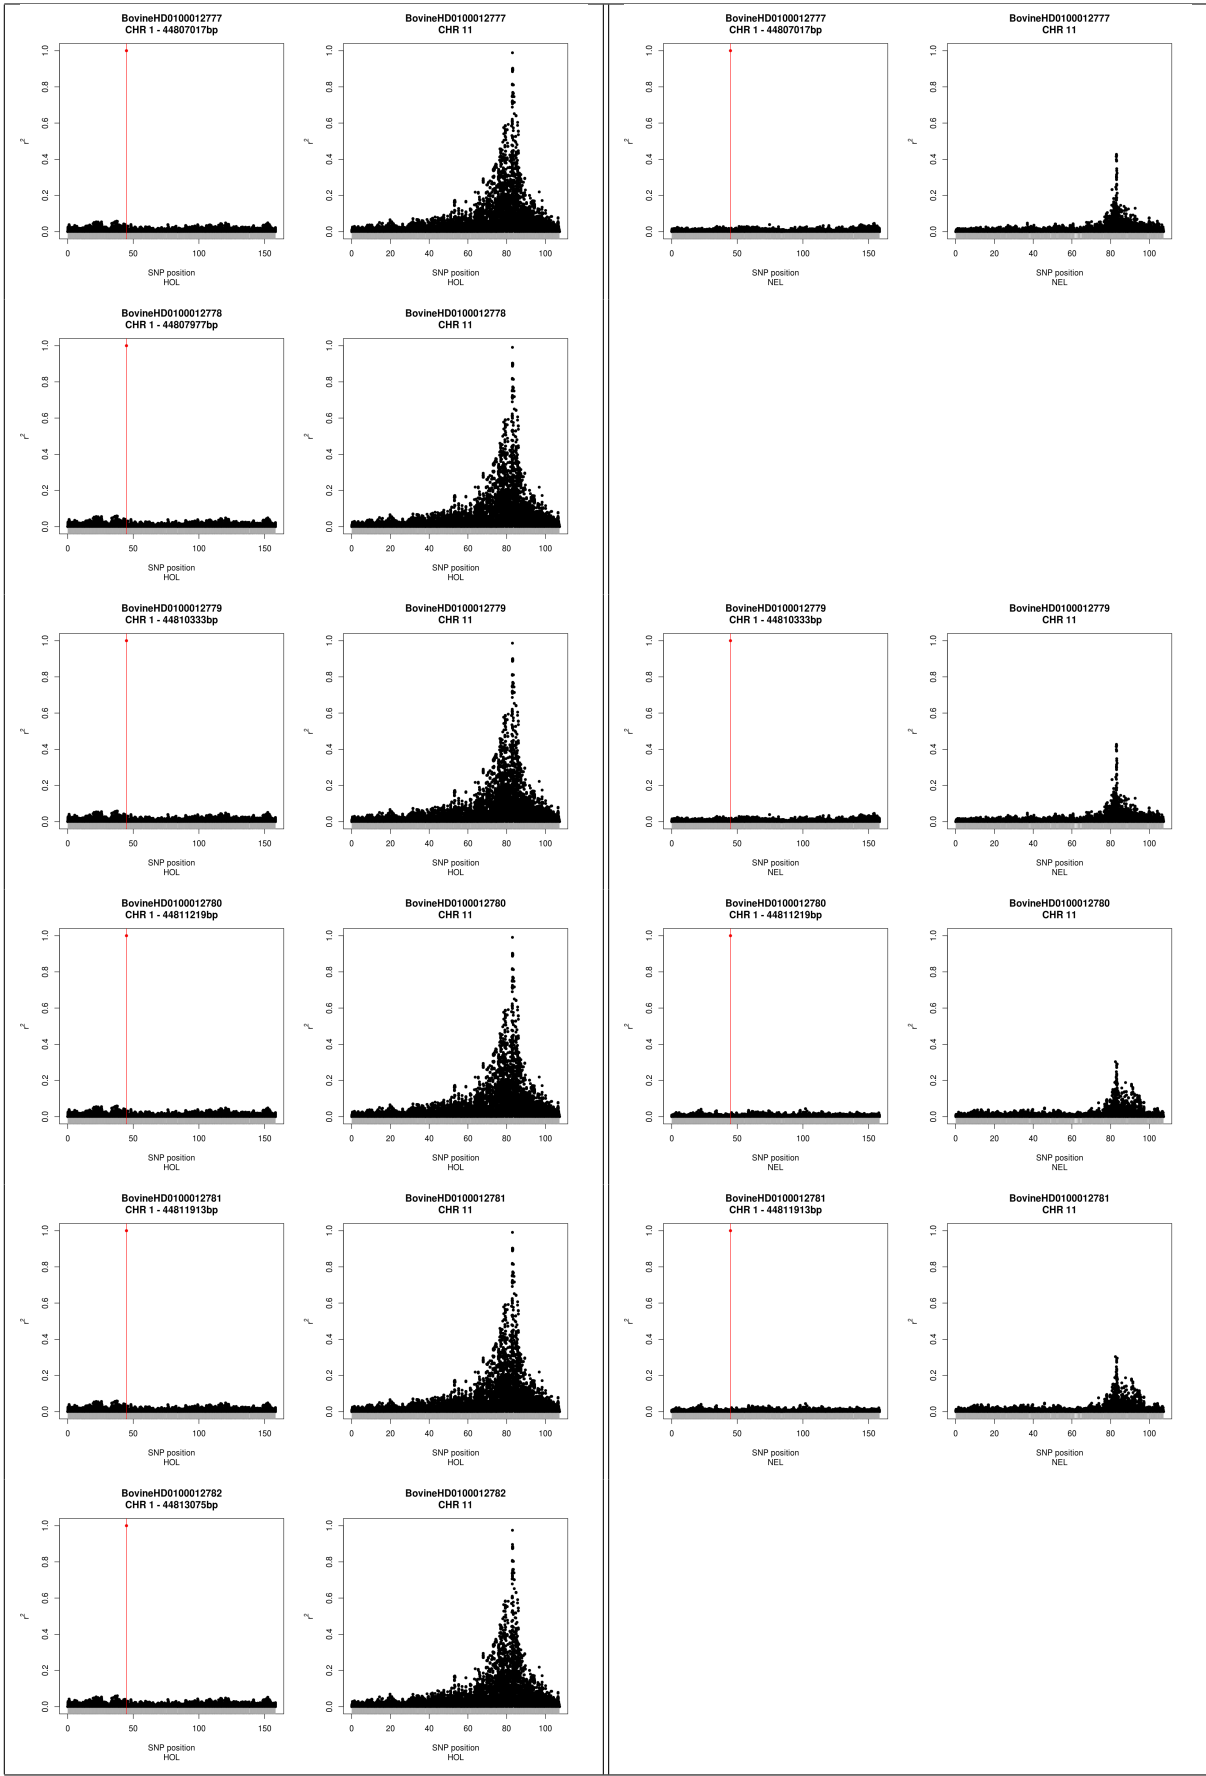



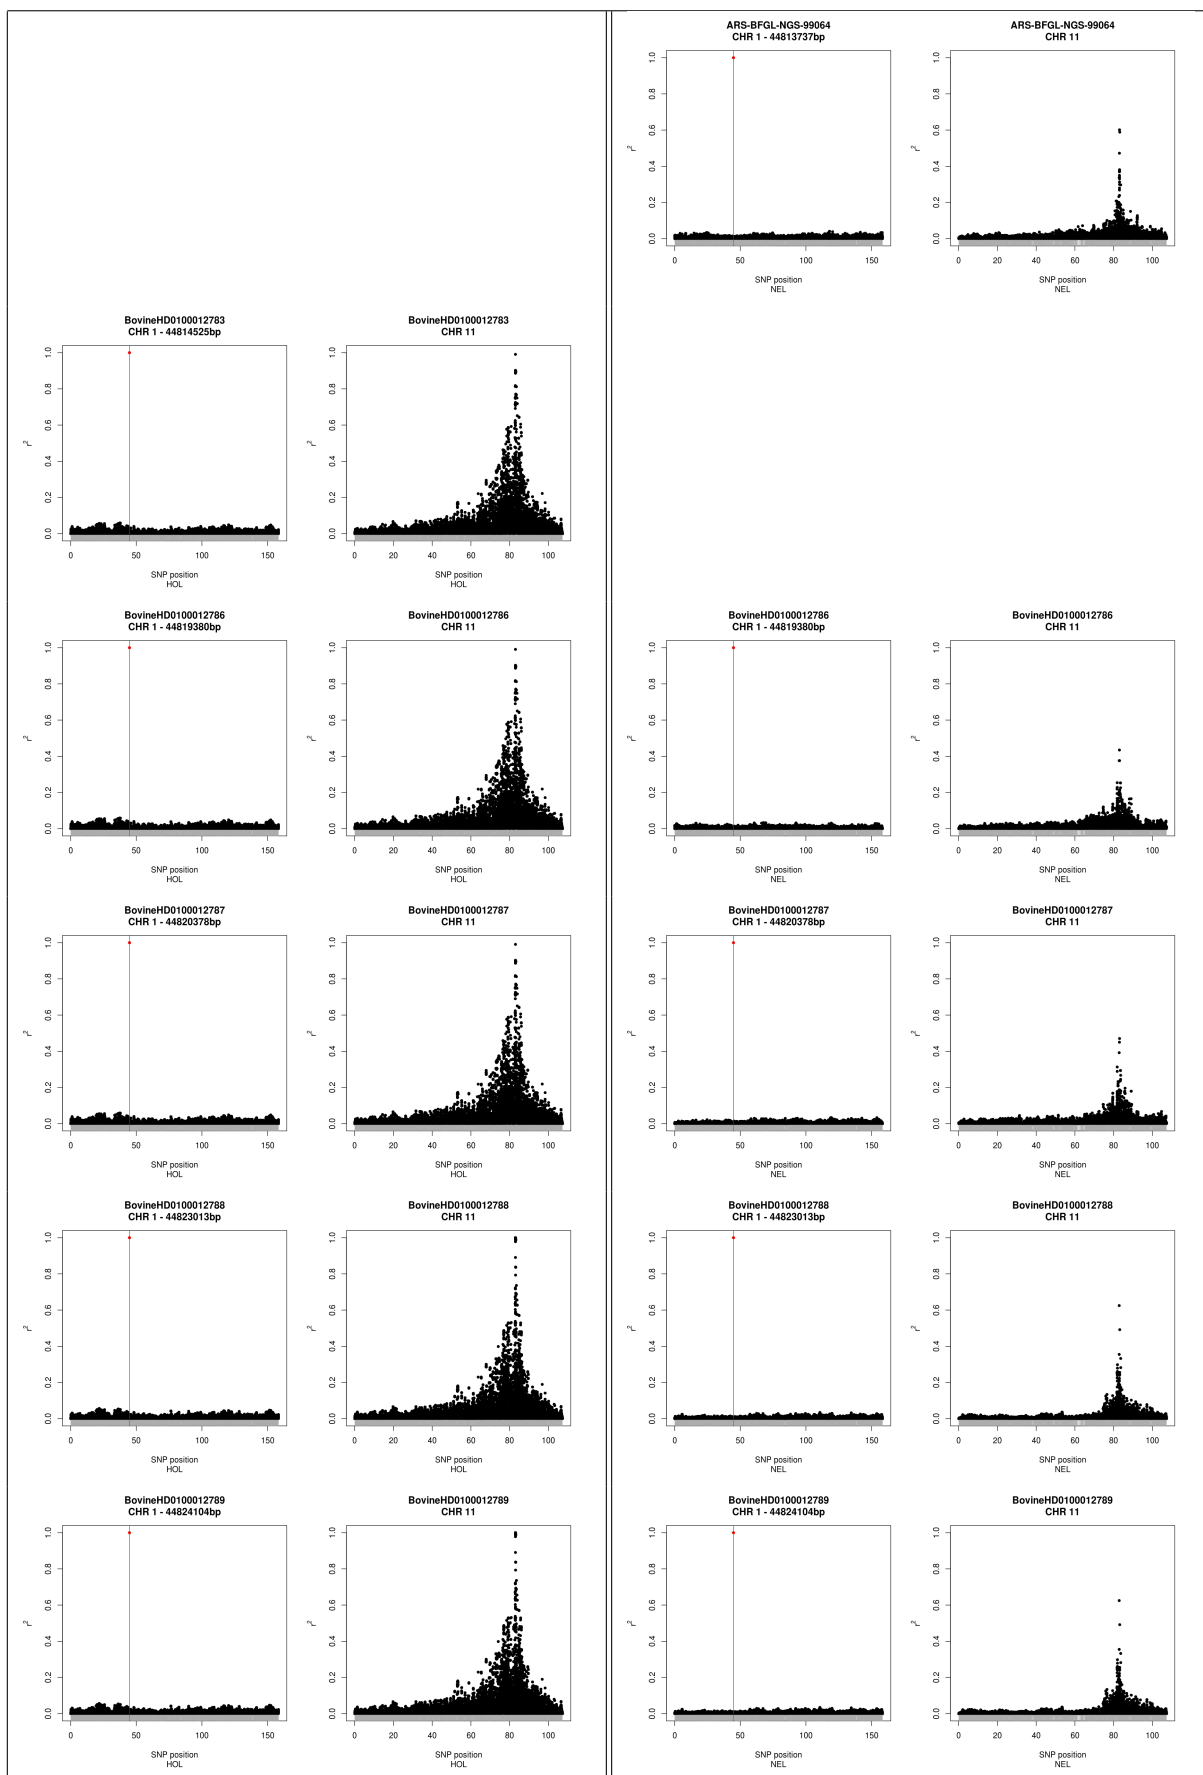



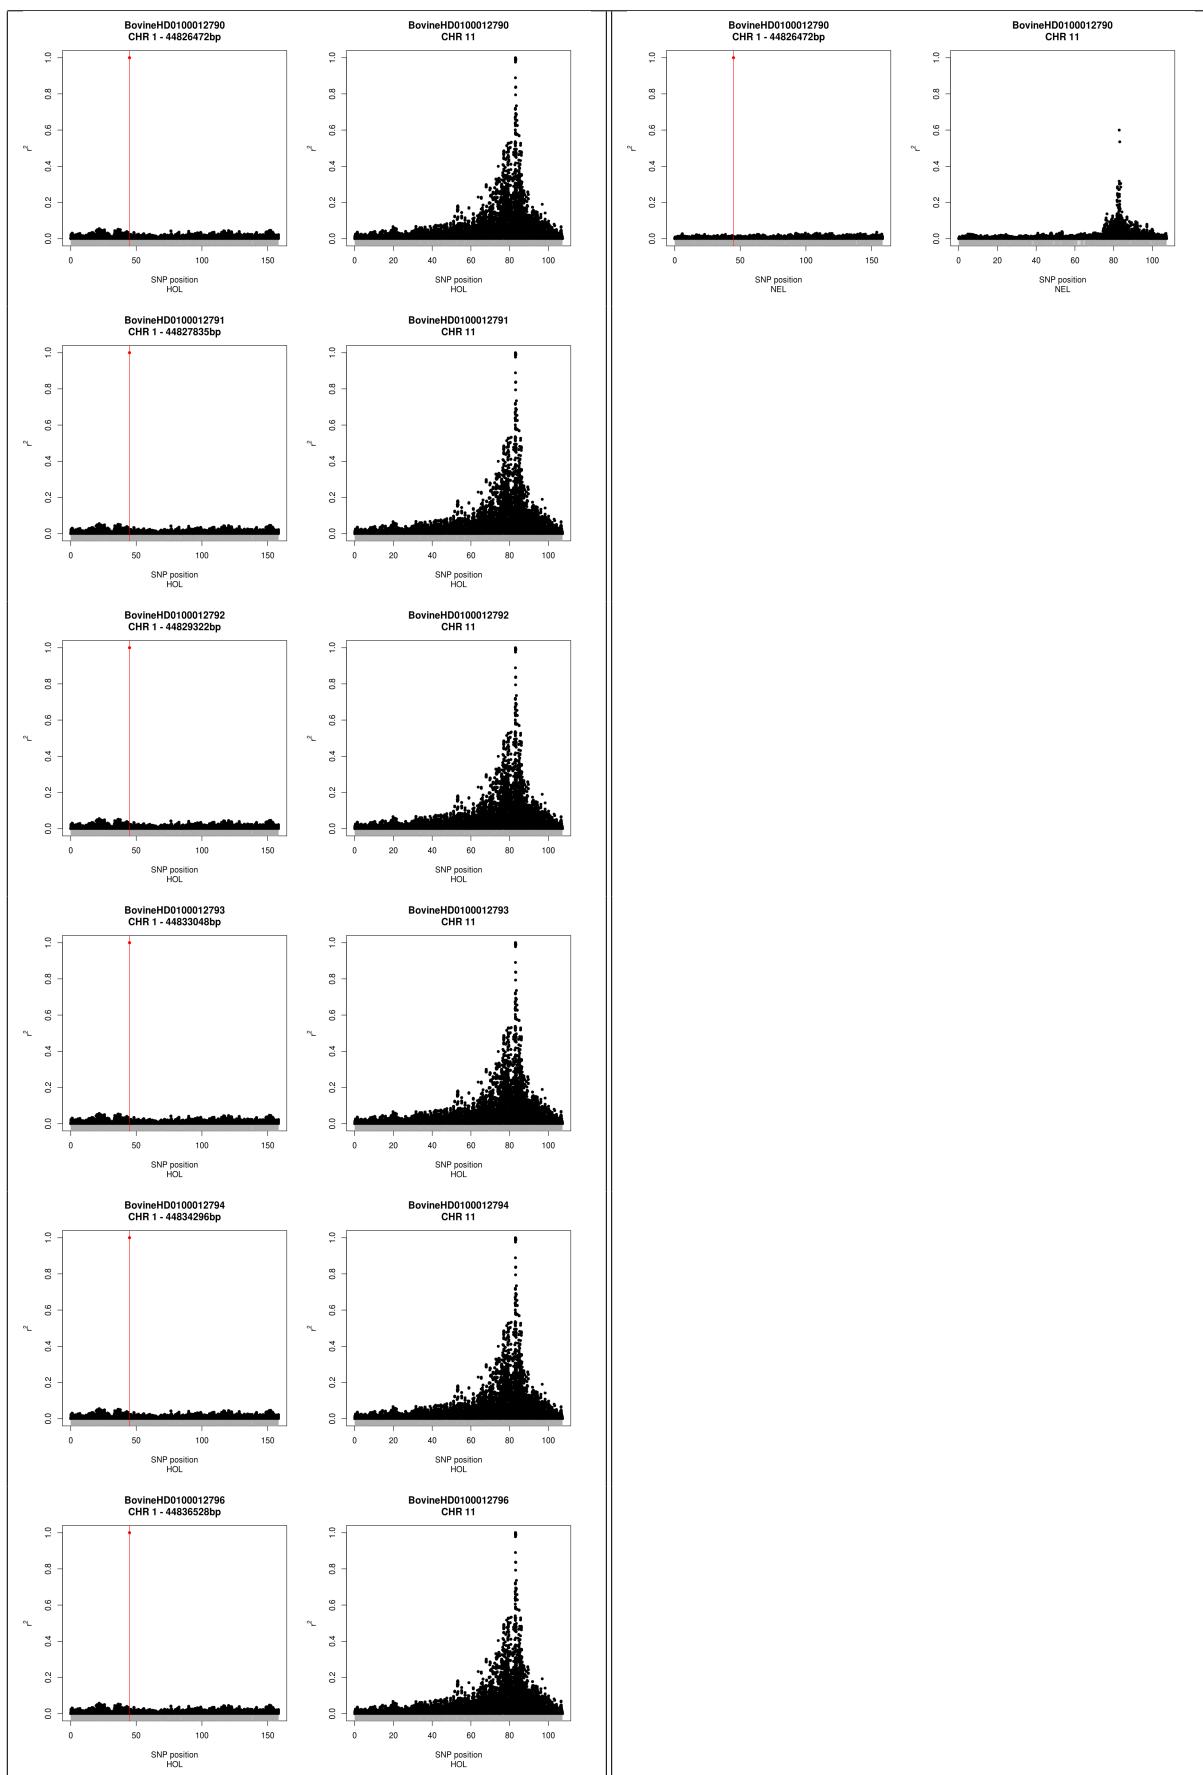



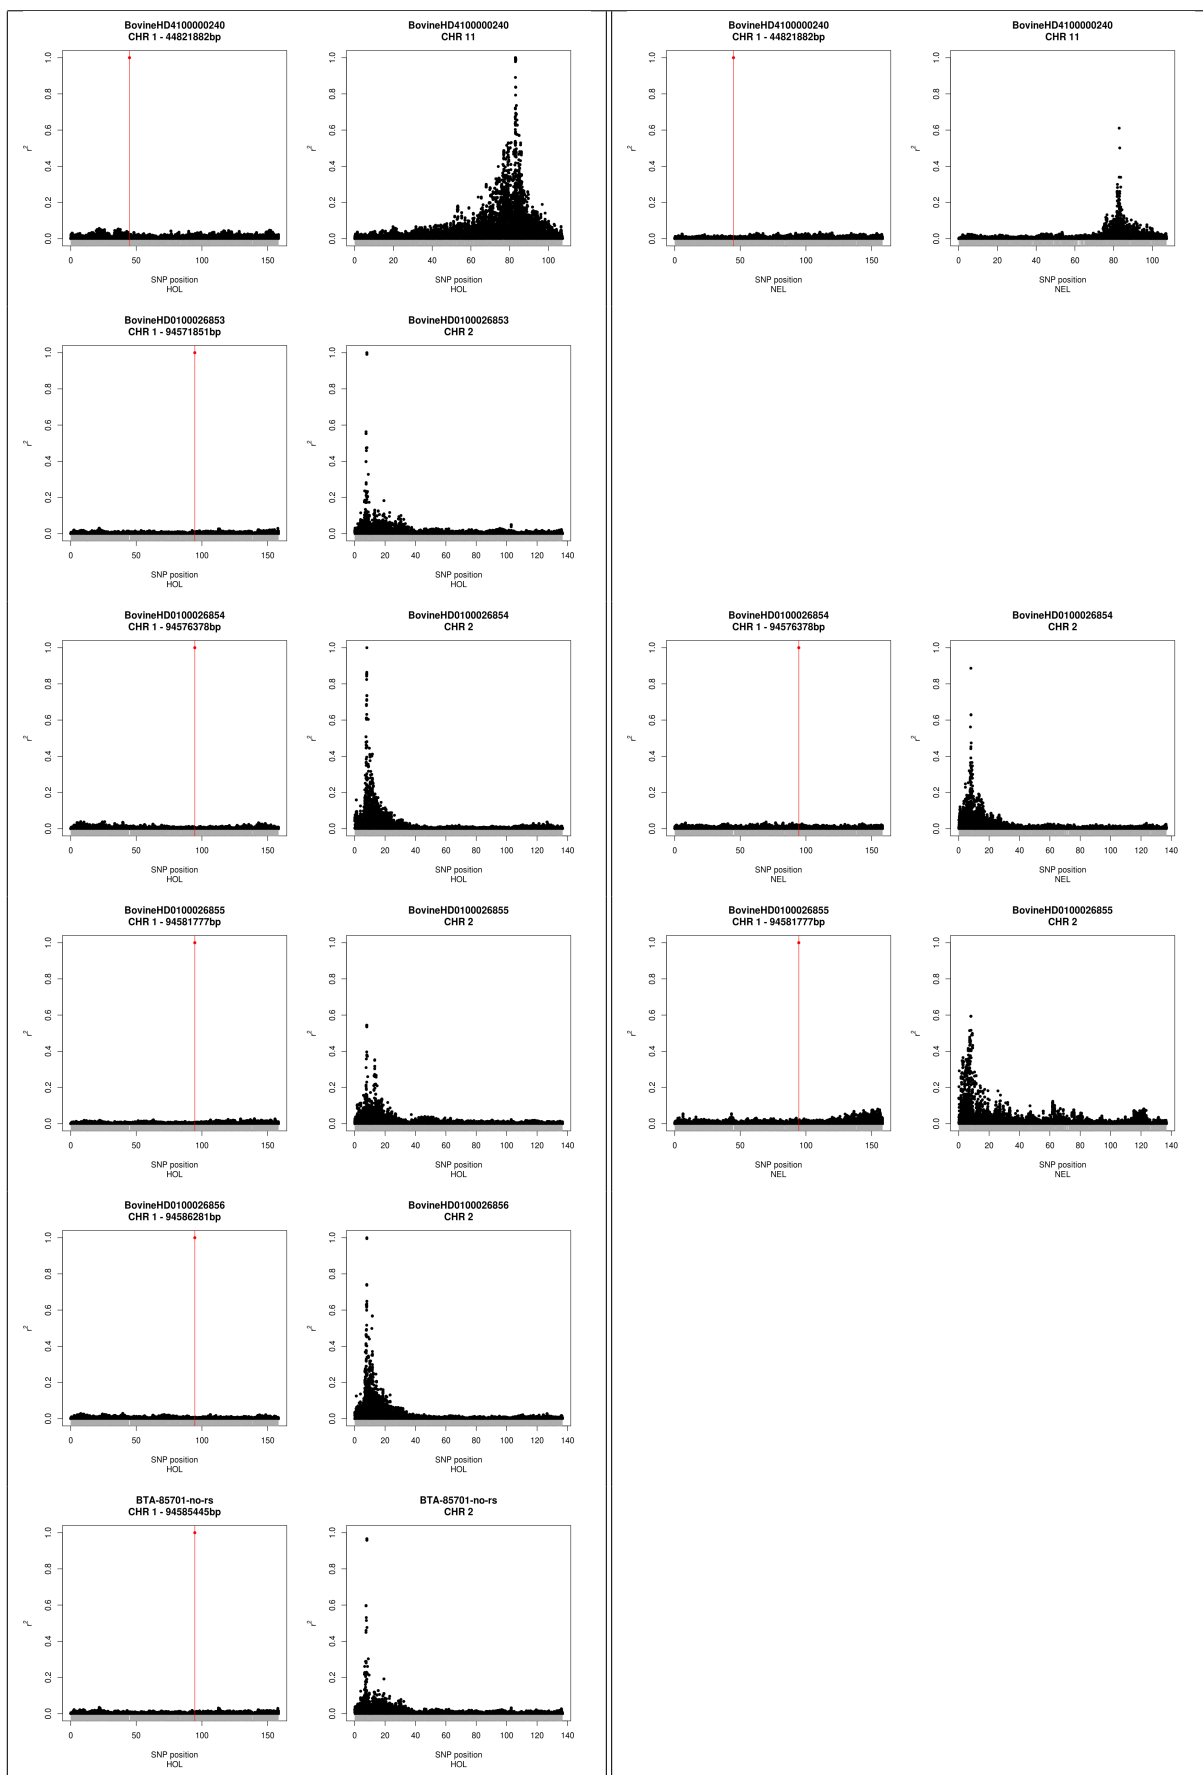



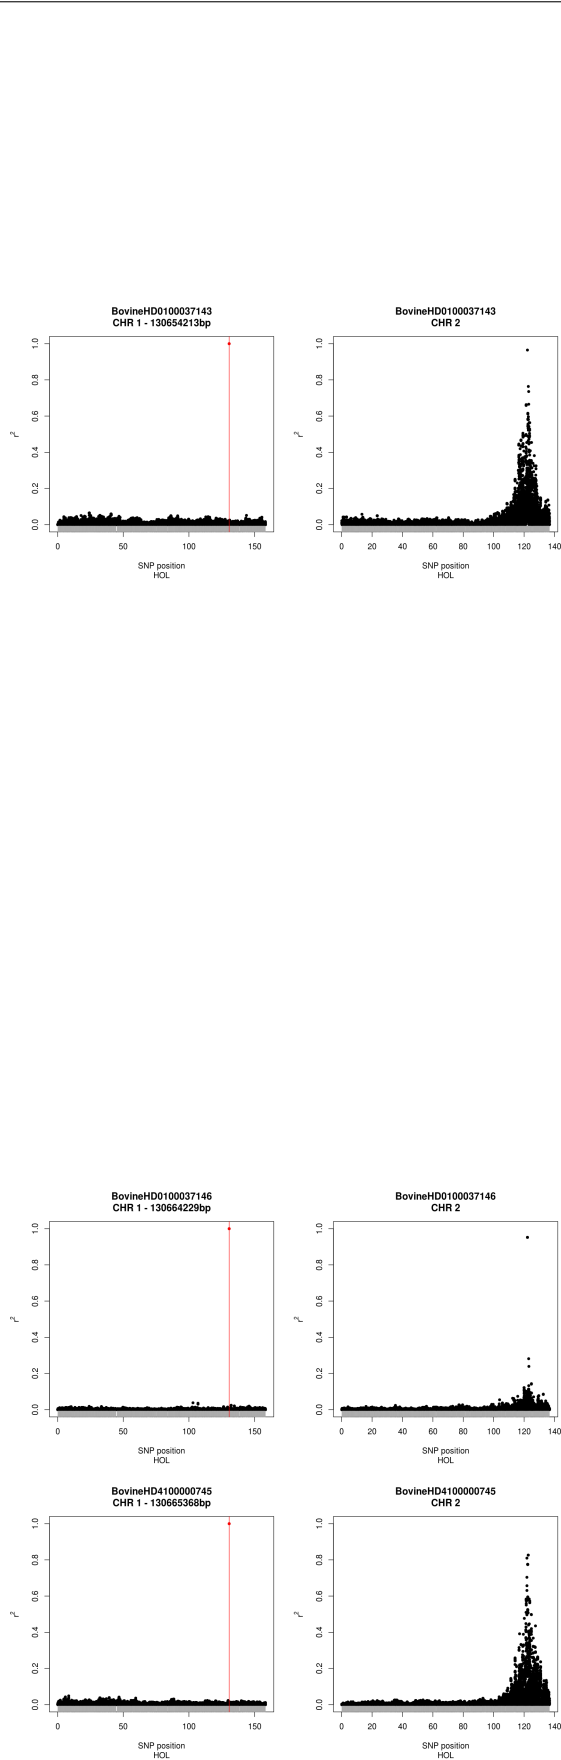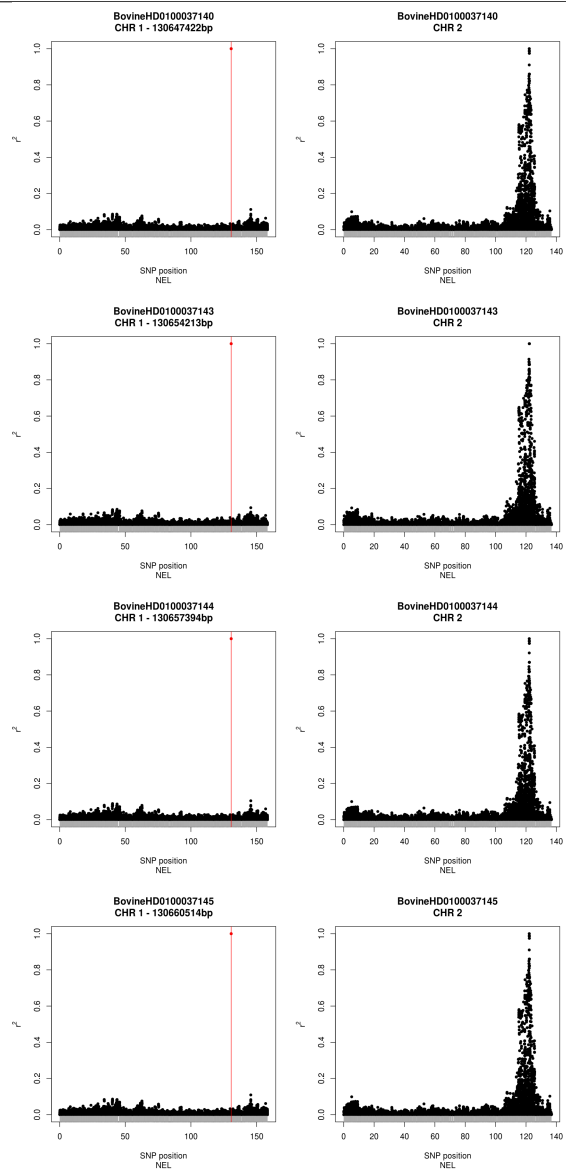



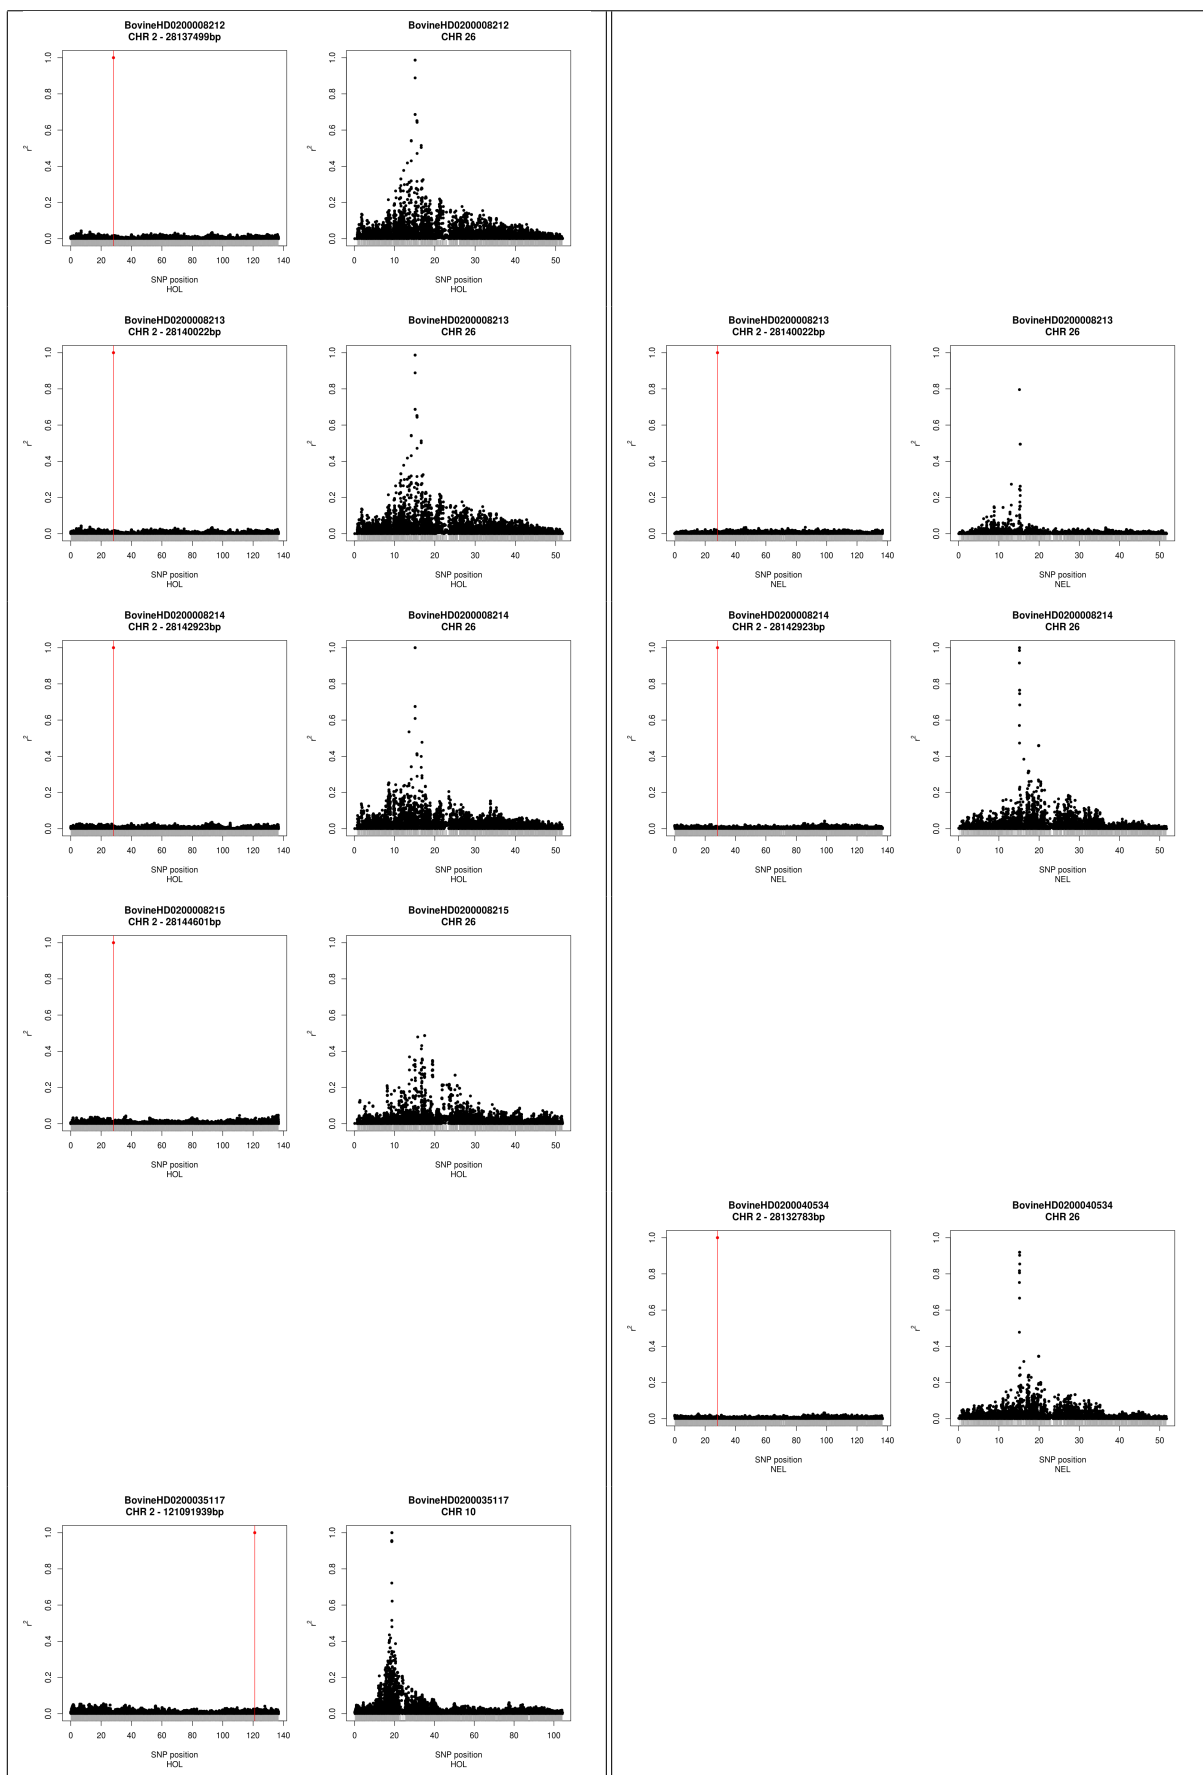



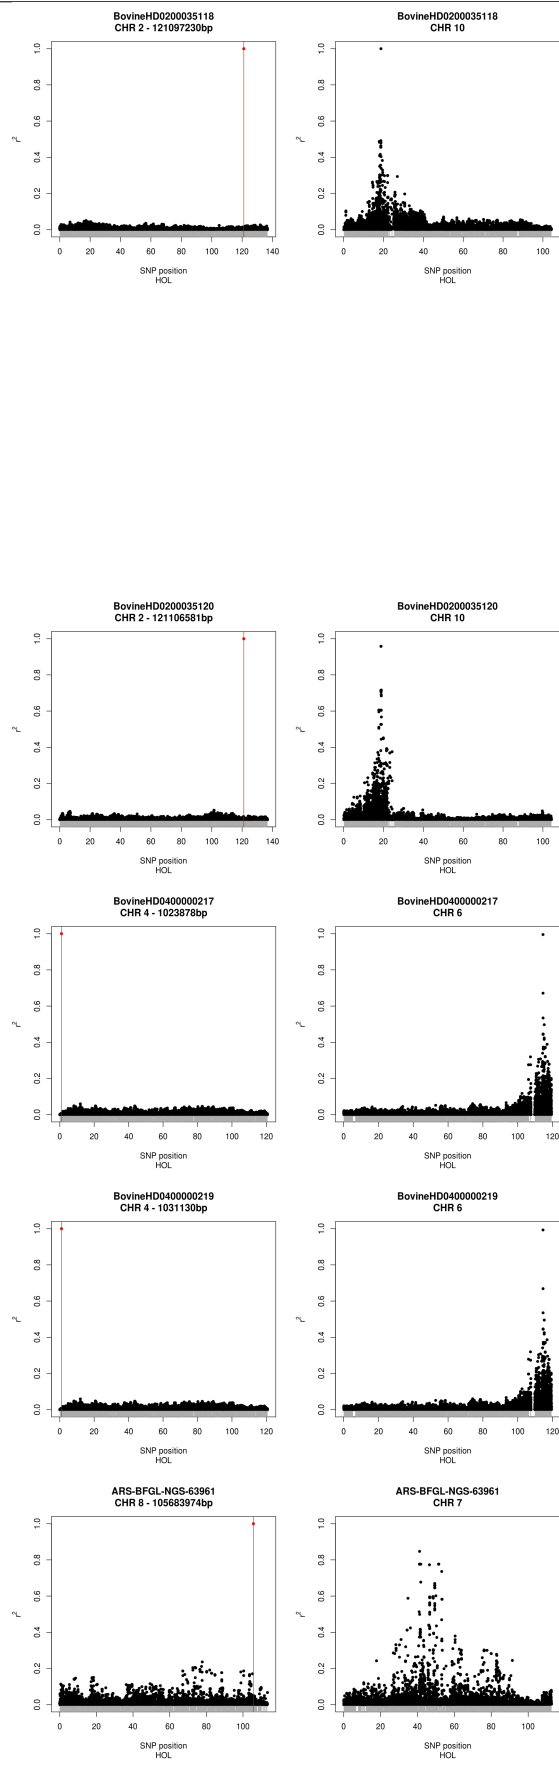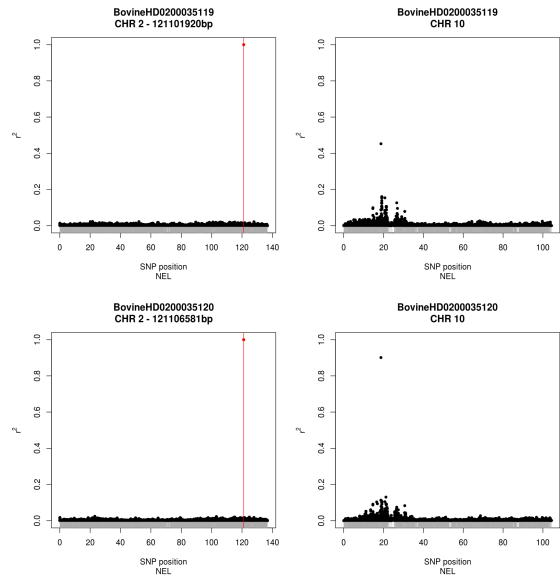



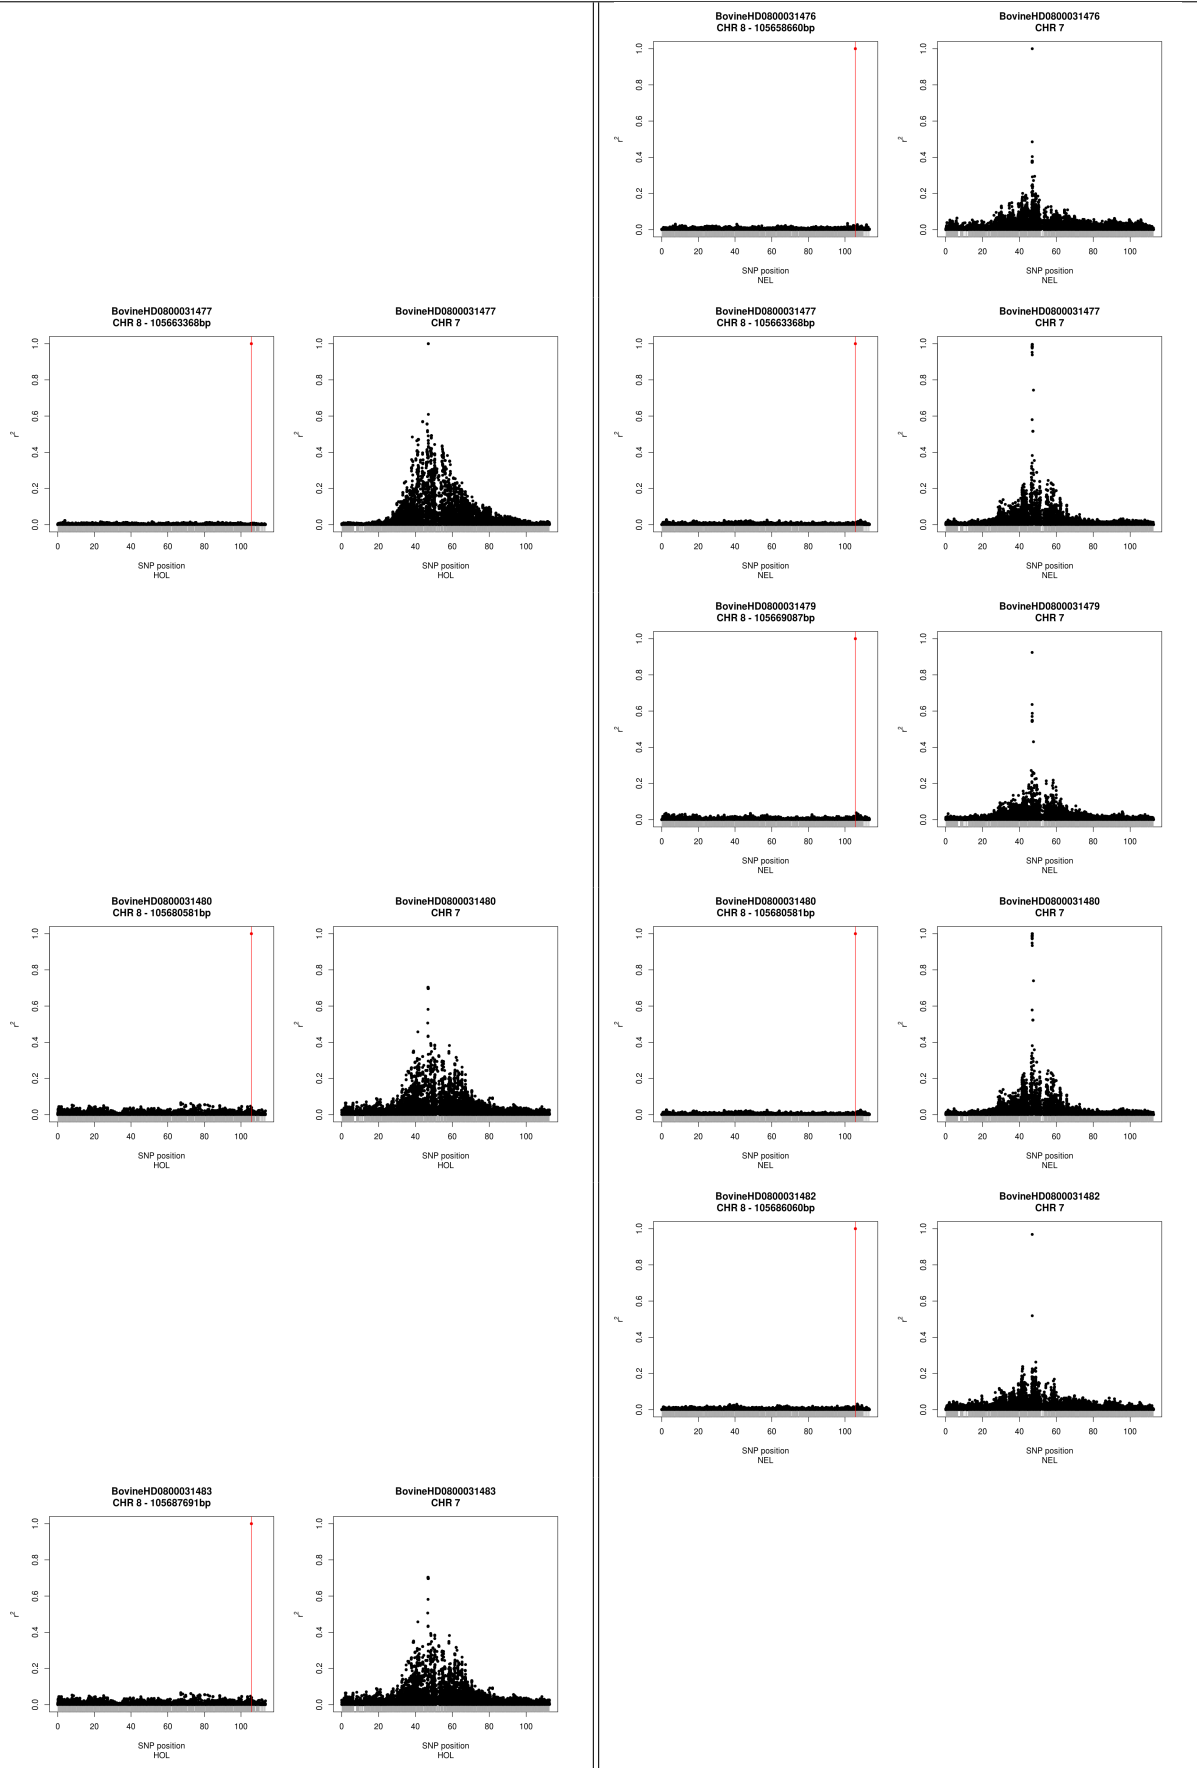



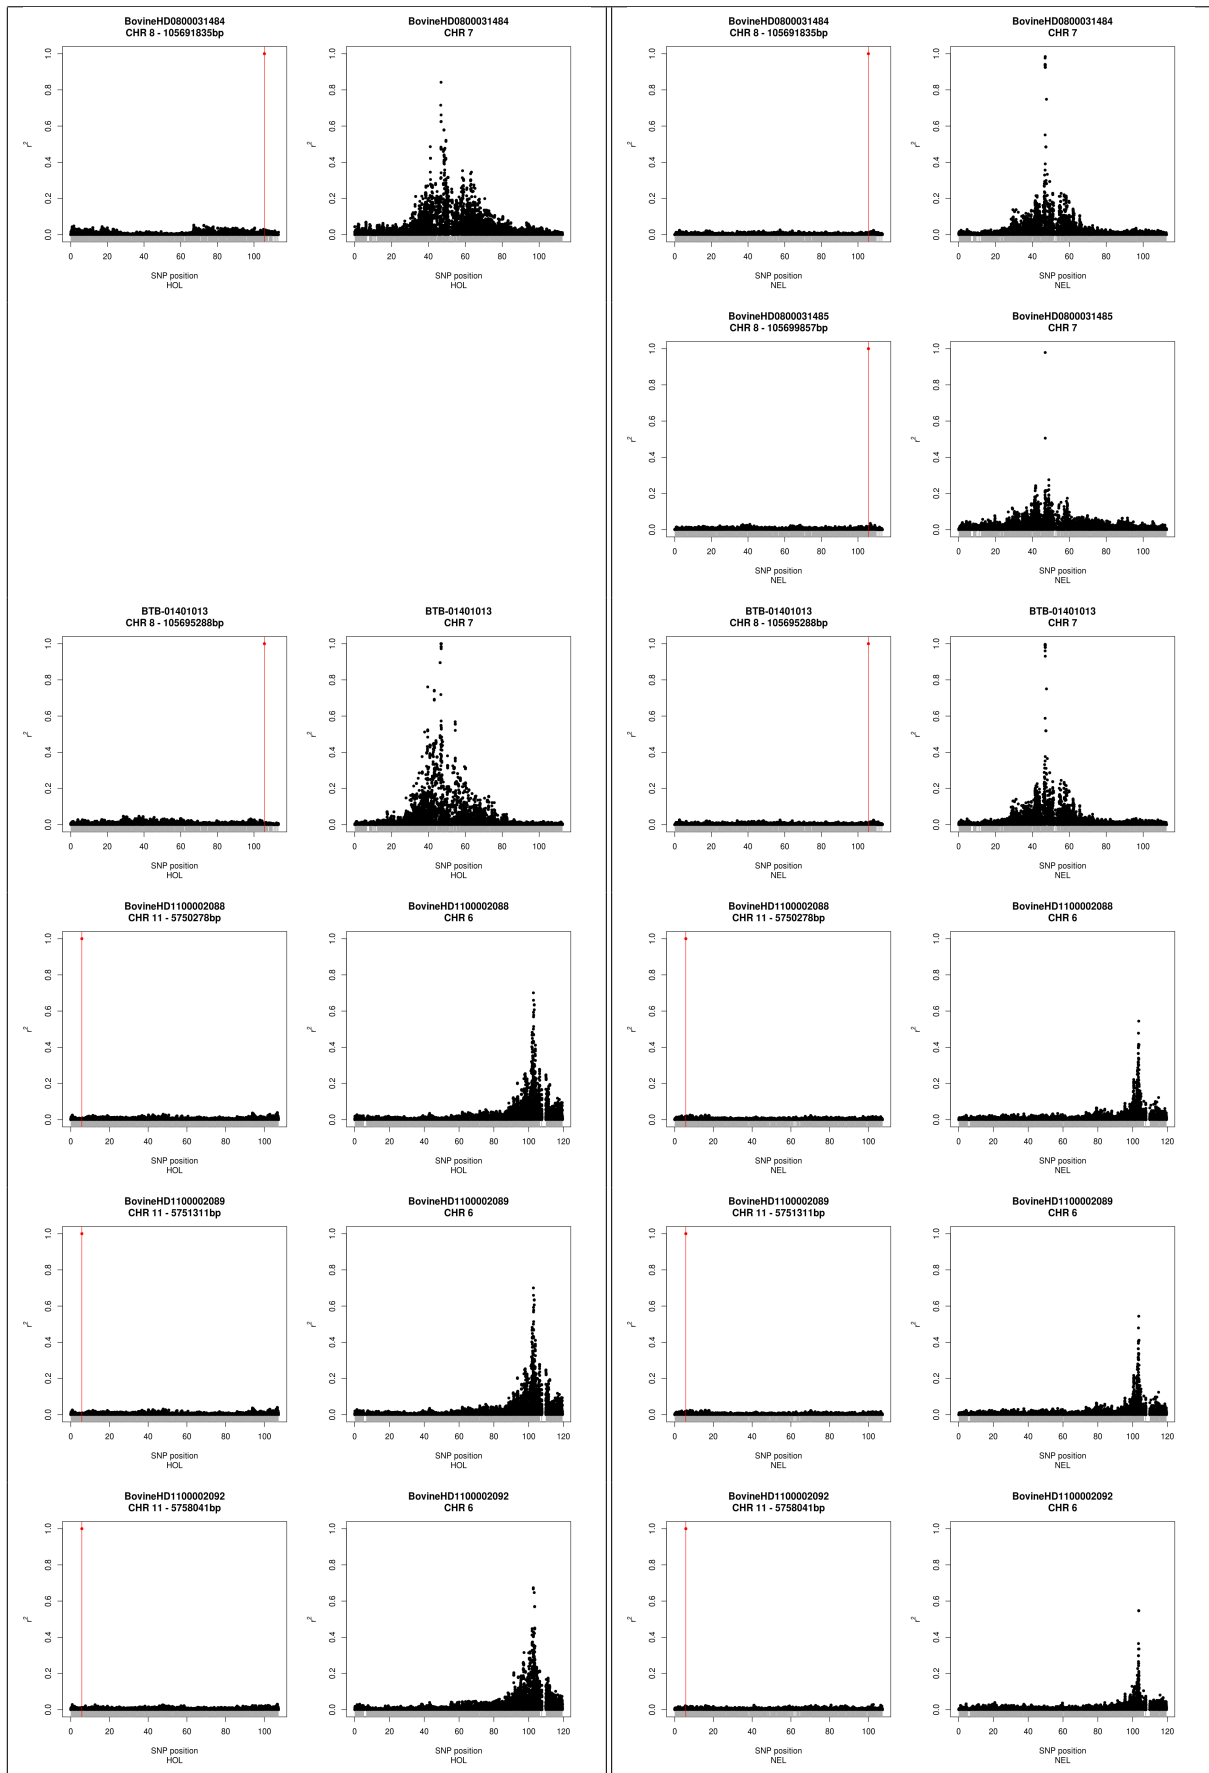



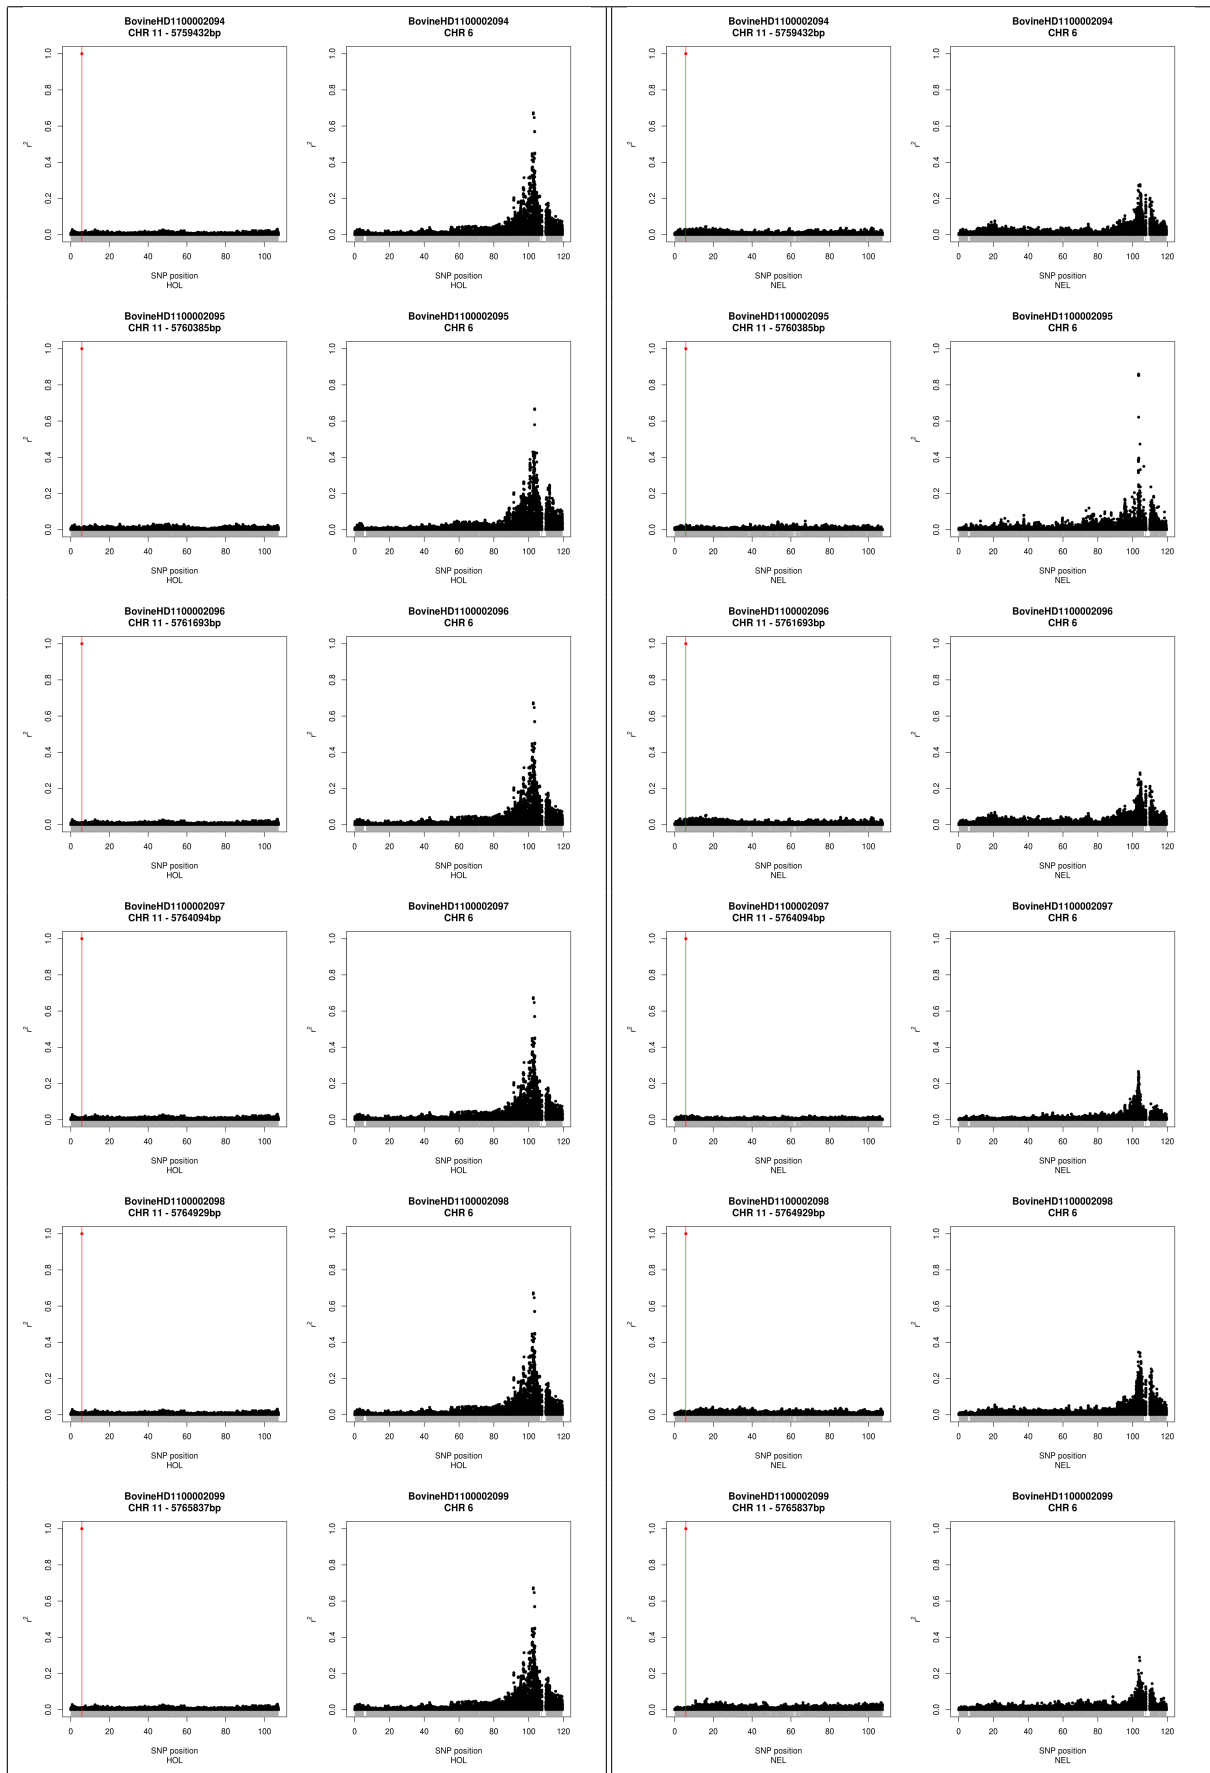



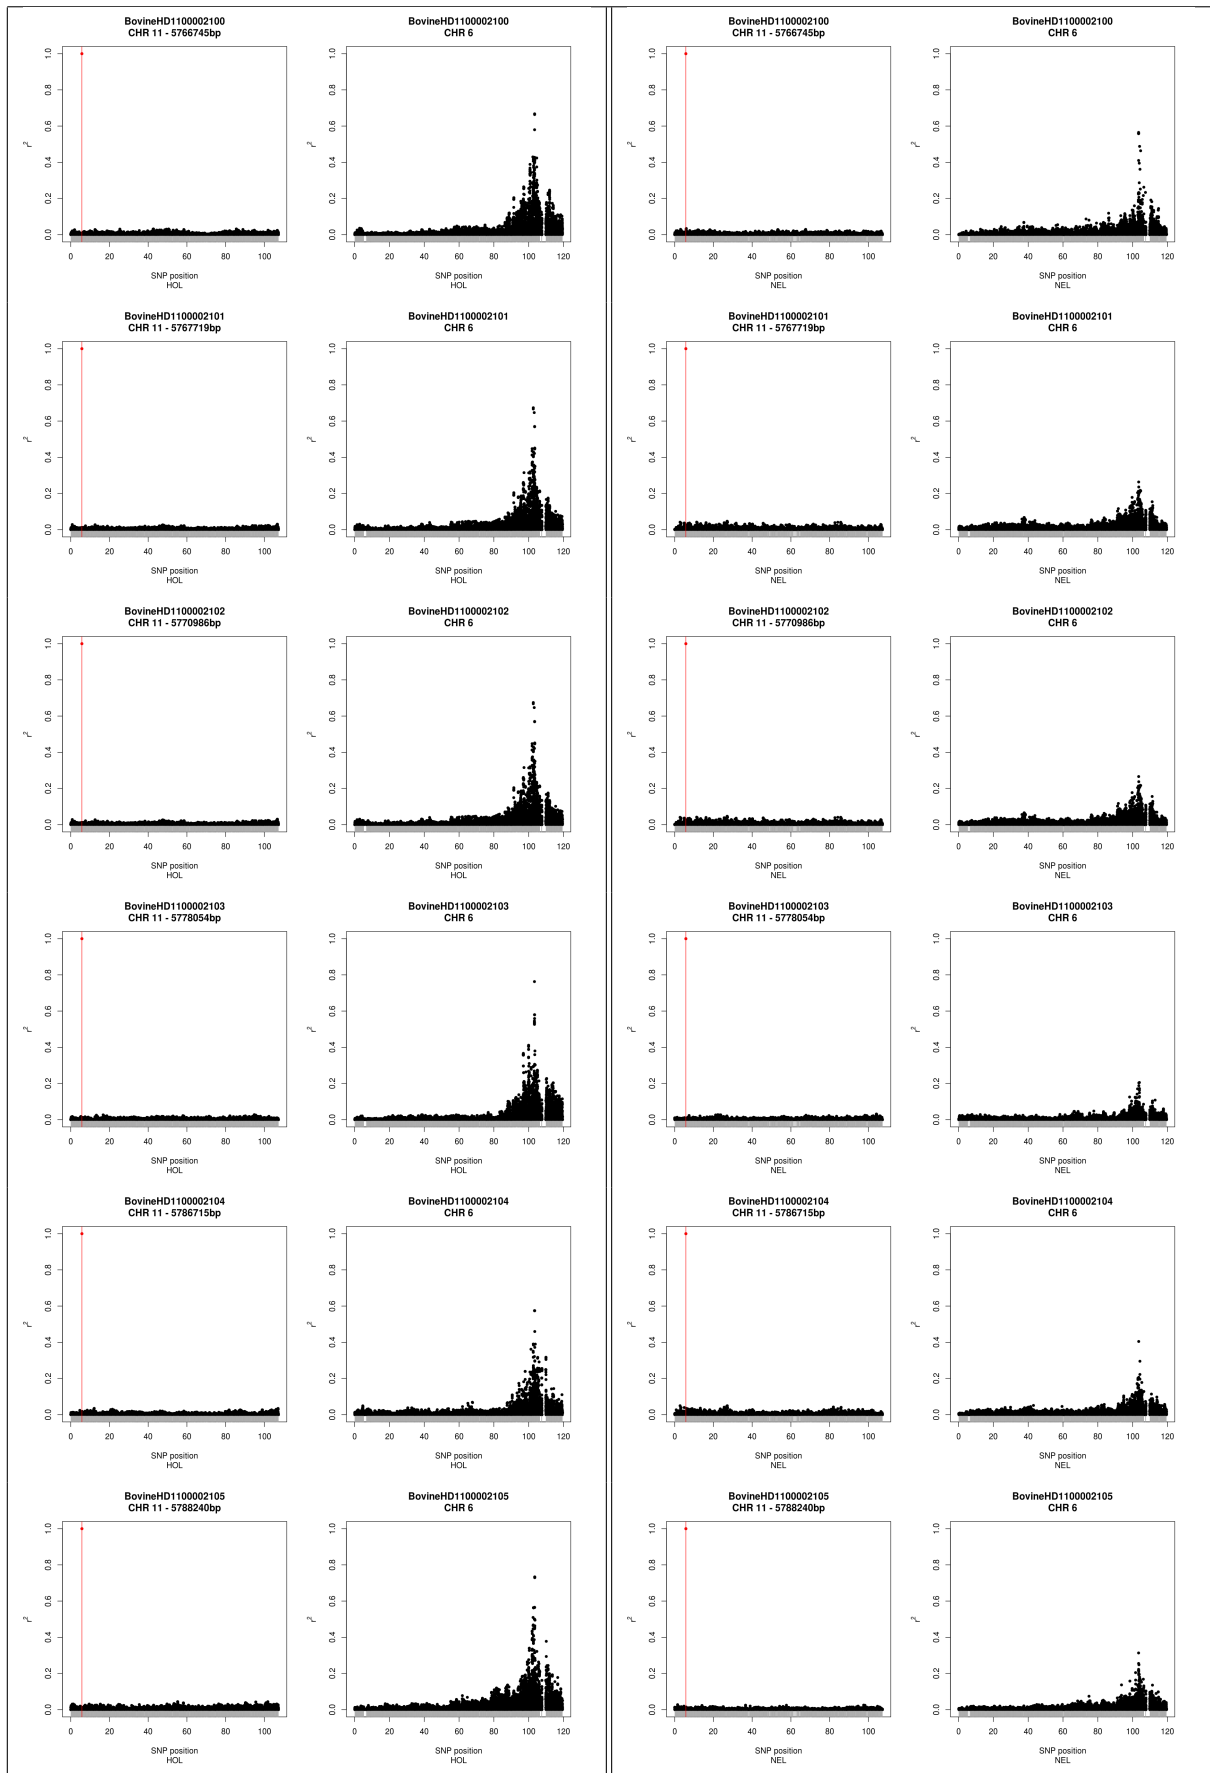



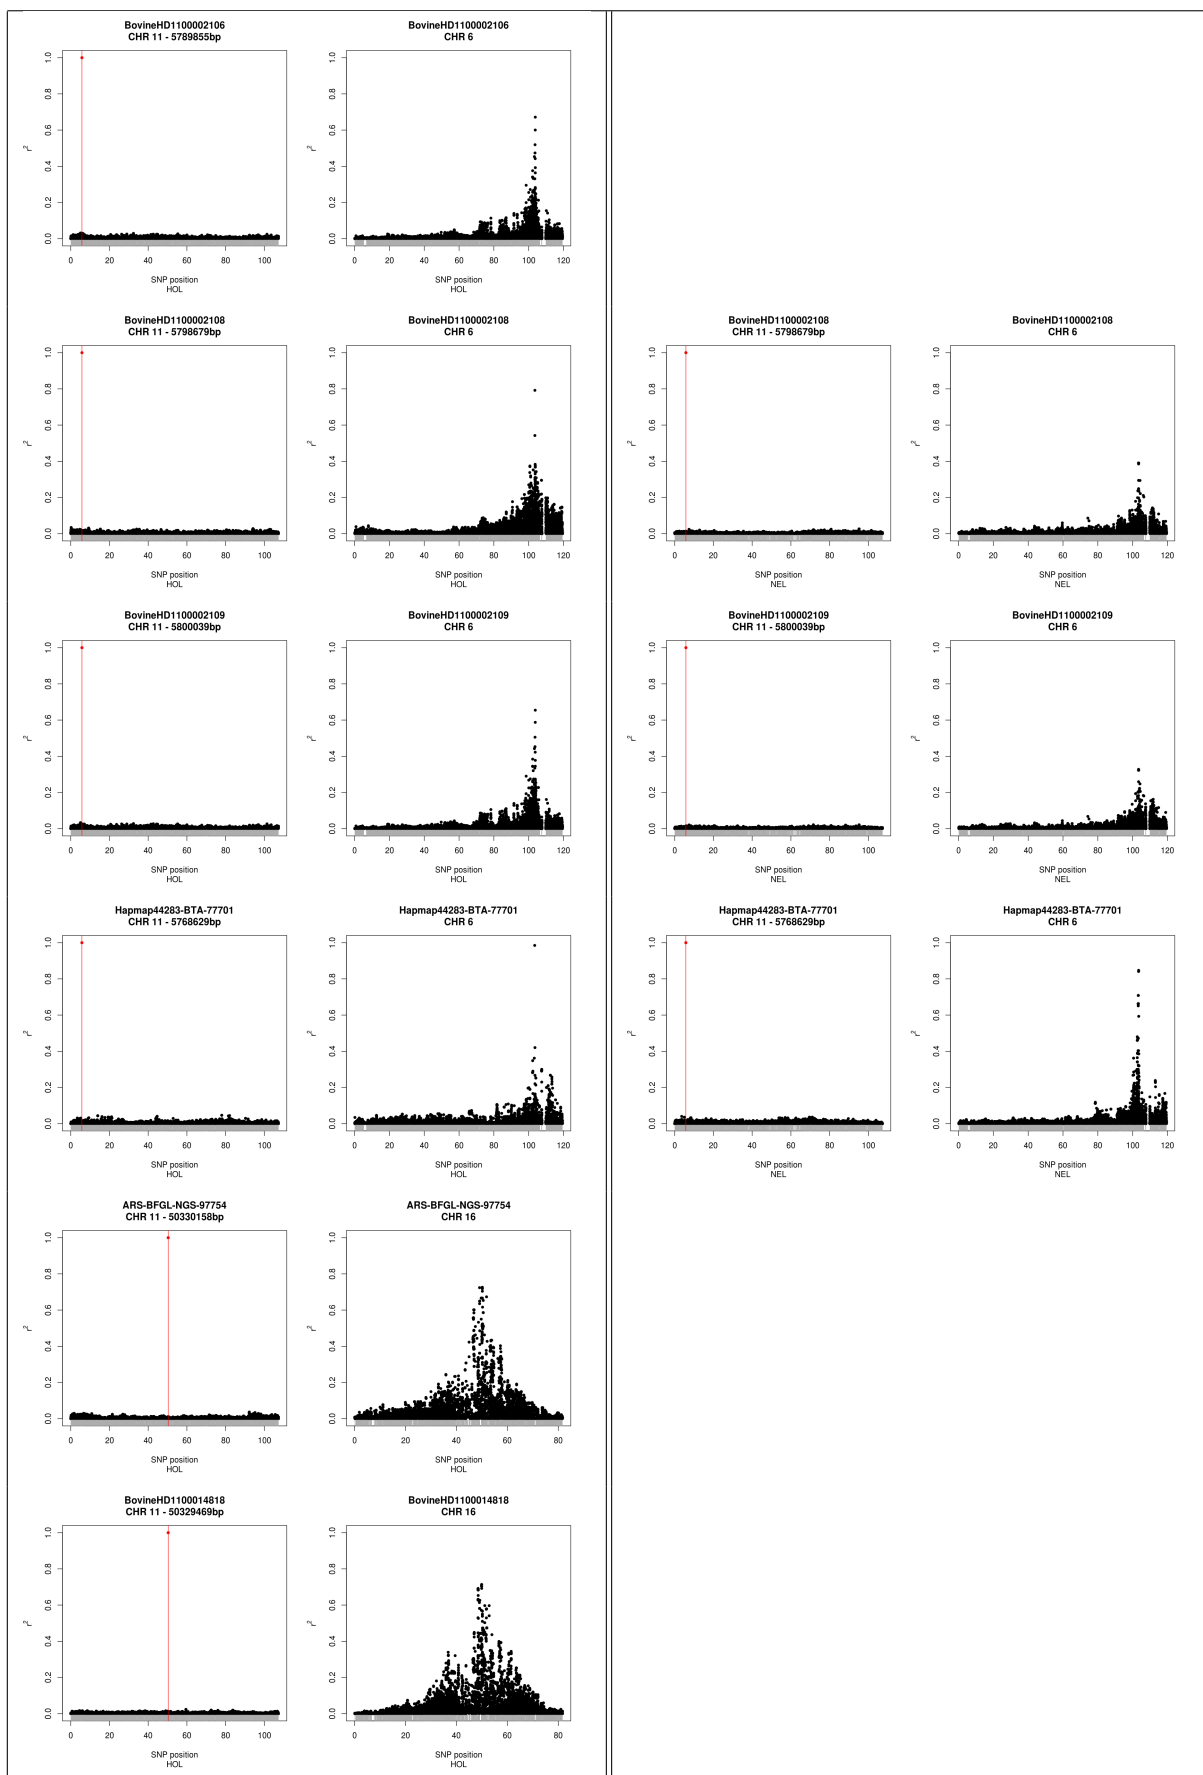



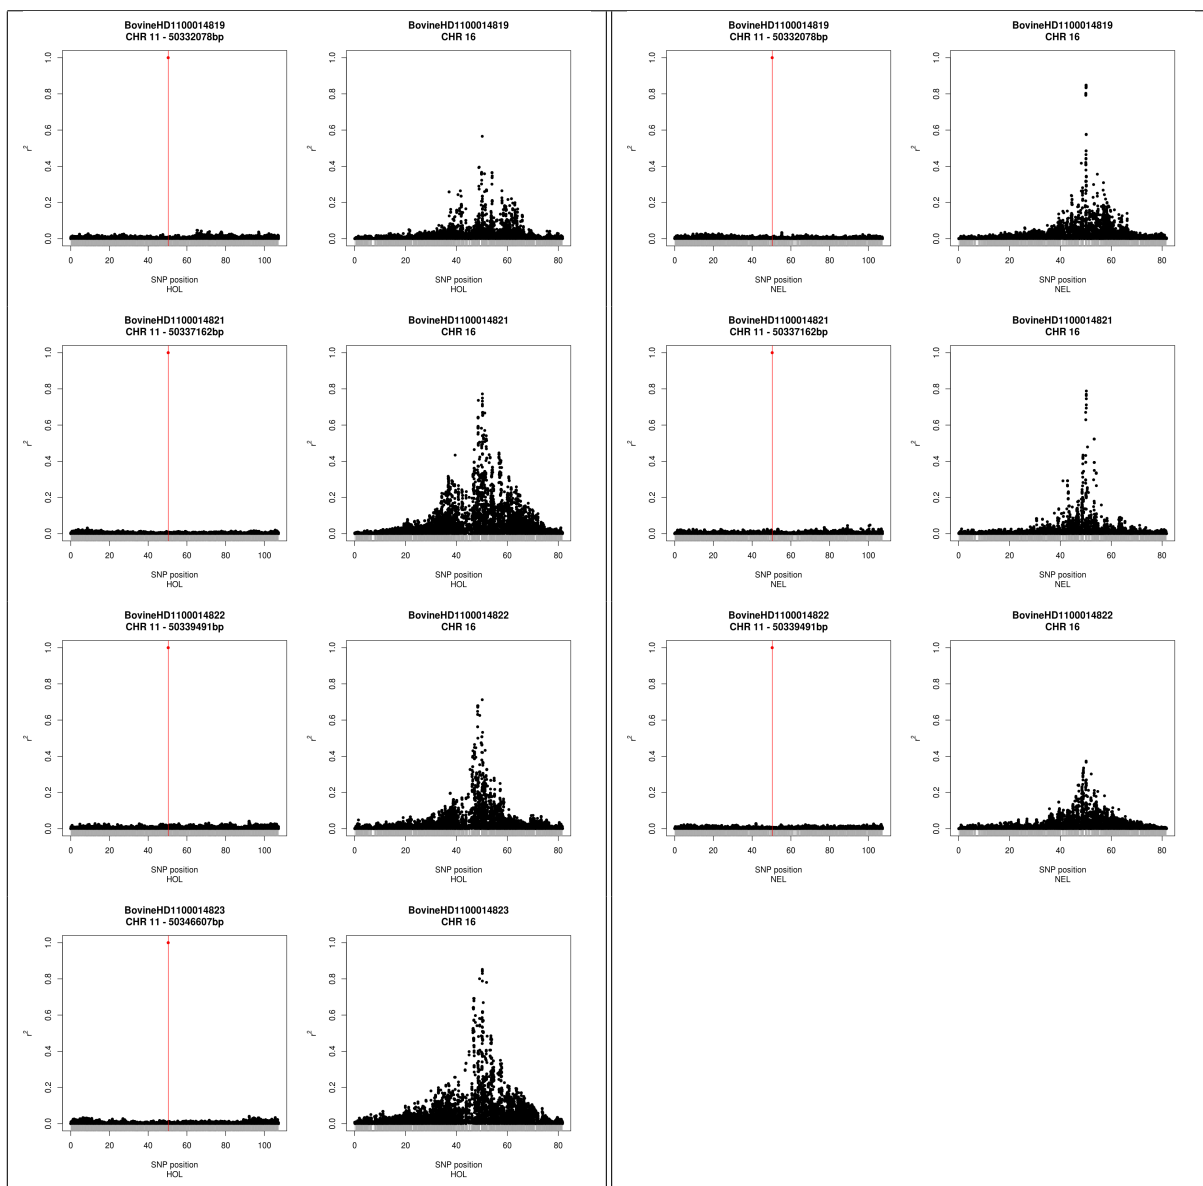

Supplement: 12864_2016_3049_MOESM7_ESM.pdf [file 12864_2016_3049_MOESM7_ESM.pdf]
